# Supplementary material
Source: PubMed Central journal article supplement (PMC3675888)

## Supplementary Figure 1

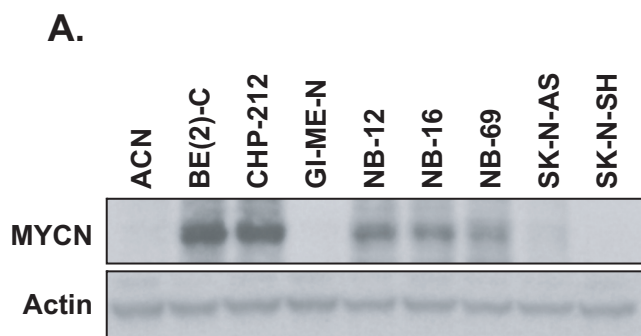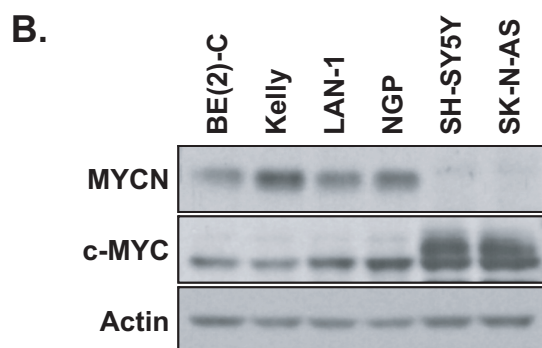

## Supplementary Figure 2

**A.**

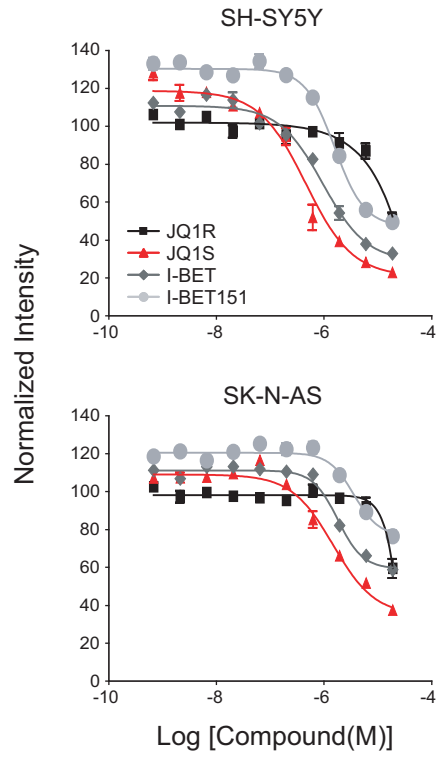

**B.**

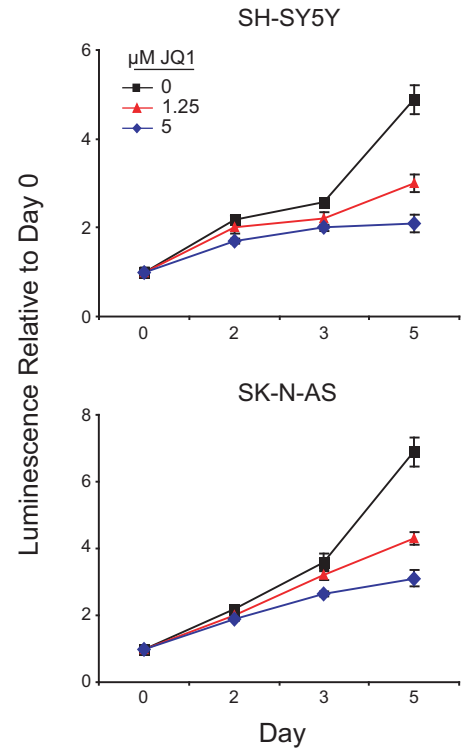

# Supplementary Figure 3

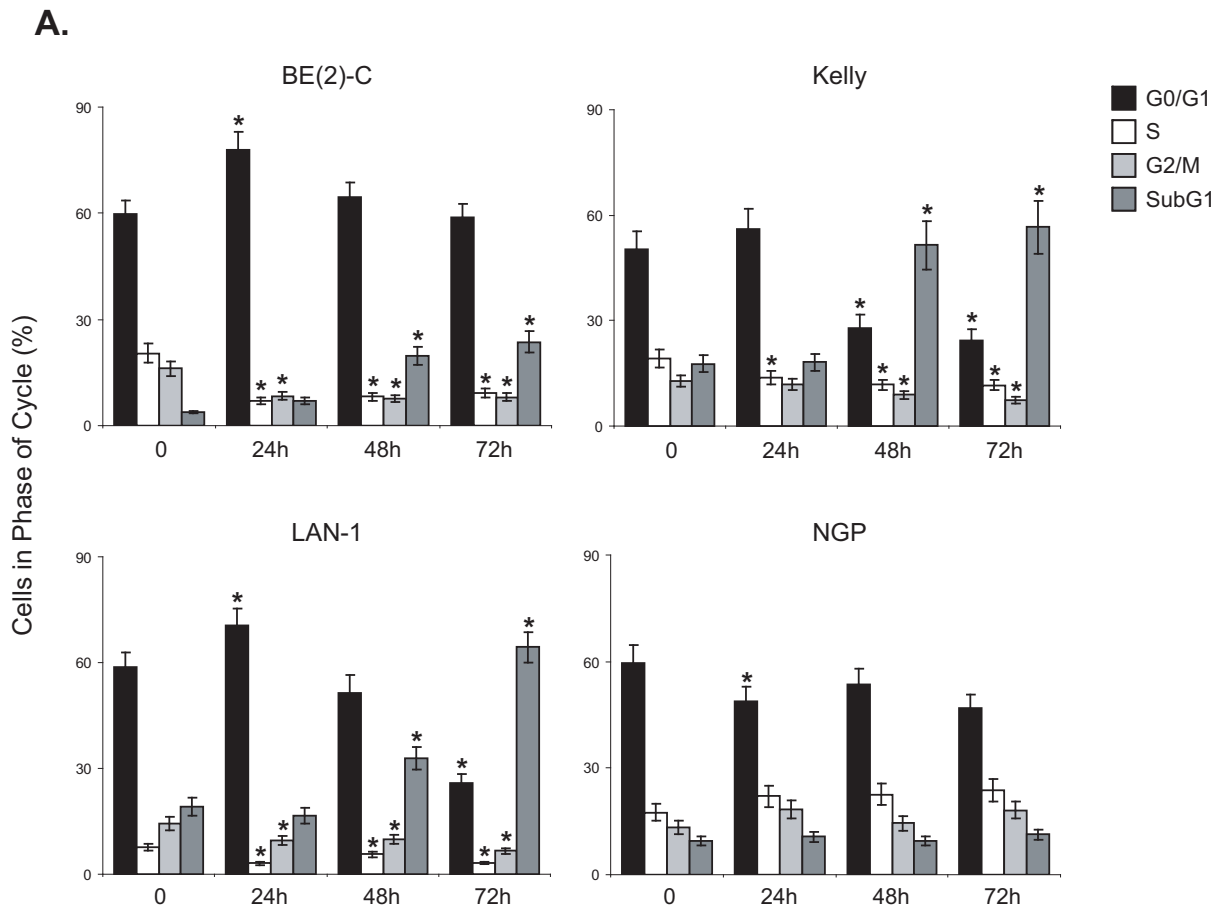

## Supplementary Figure 4

**A.**

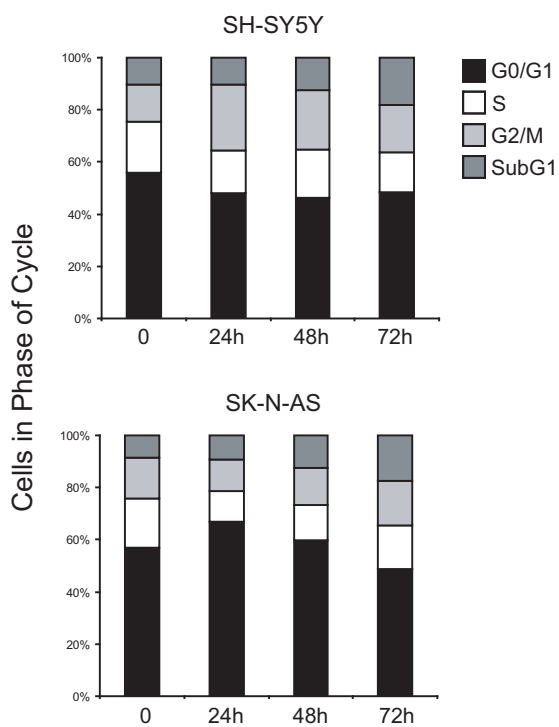

**B.**

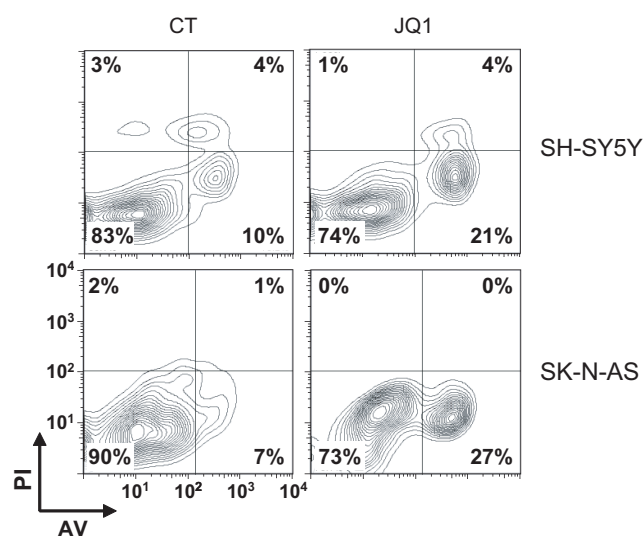

## Supplementary Figure 5

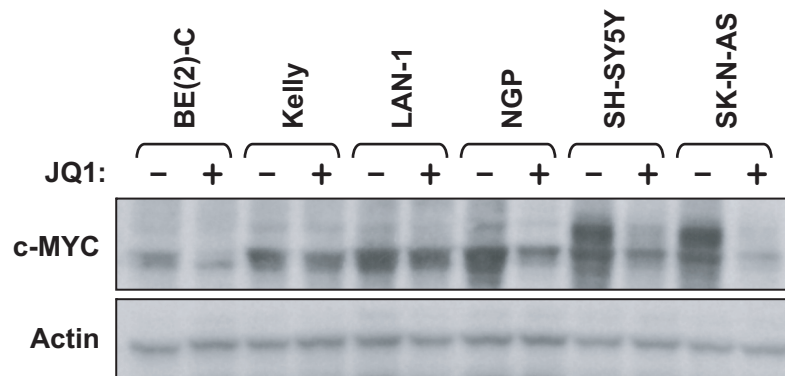

# Supplementary Figure 6

A.

NBL\_JQ1\_Downregulated\_GeneSet

NBL\_JQ1\_Upregulated\_GeneSet

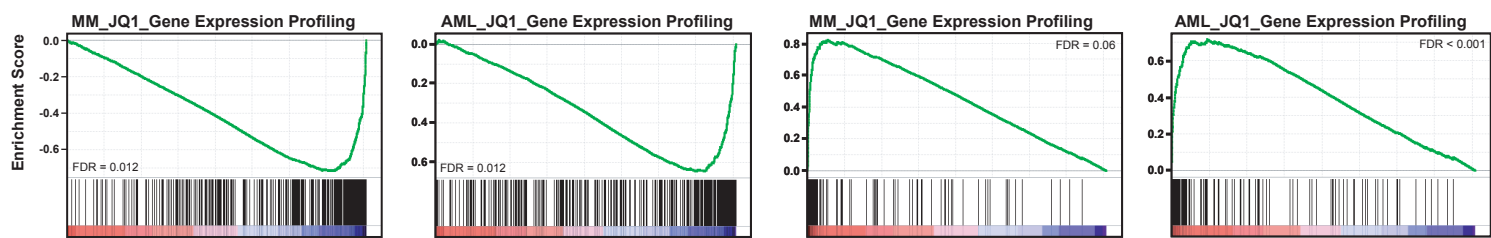

B.

MM\_JQ1\_Downregulated\_GeneSet

AML\_JQ1\_Downregulated\_GeneSet

MM\_JQ1\_Upregulated\_GeneSet

AML\_JQ1\_Upregulated\_GeneSet

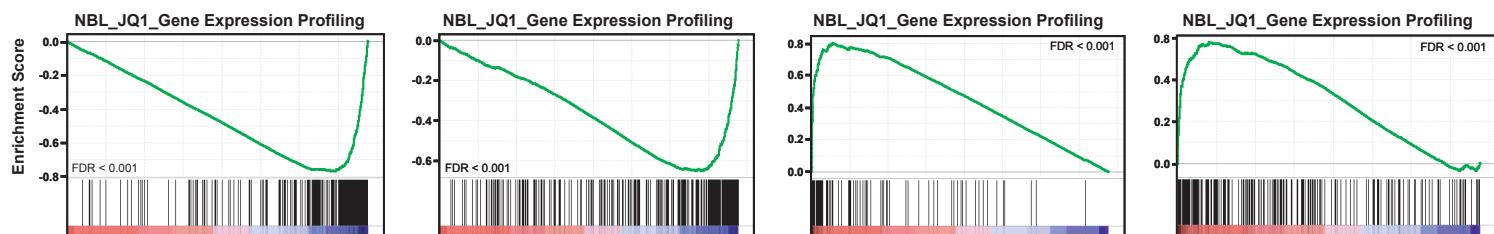

# Supplementary Figure 7

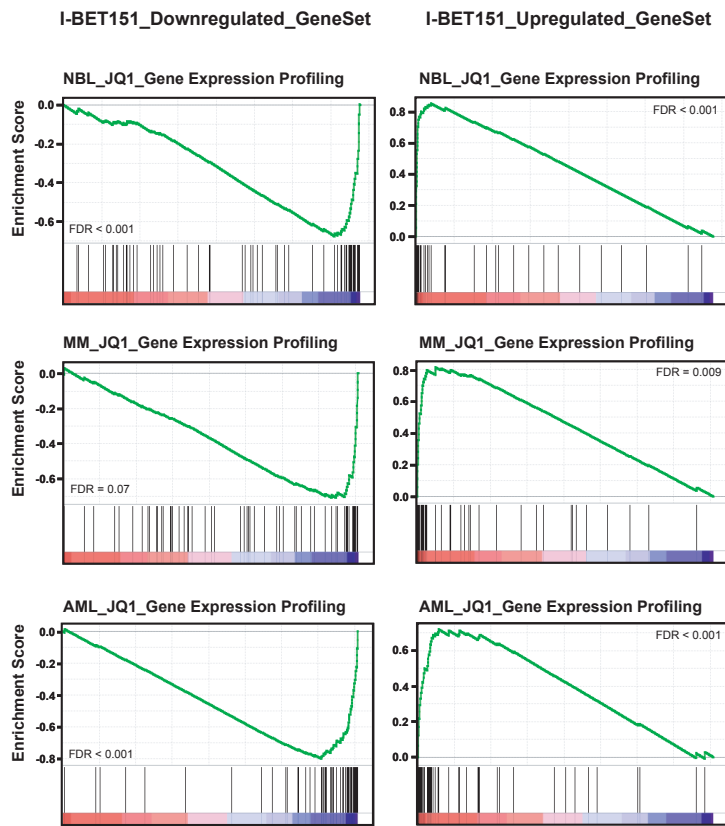

# Supplementary Figure 8

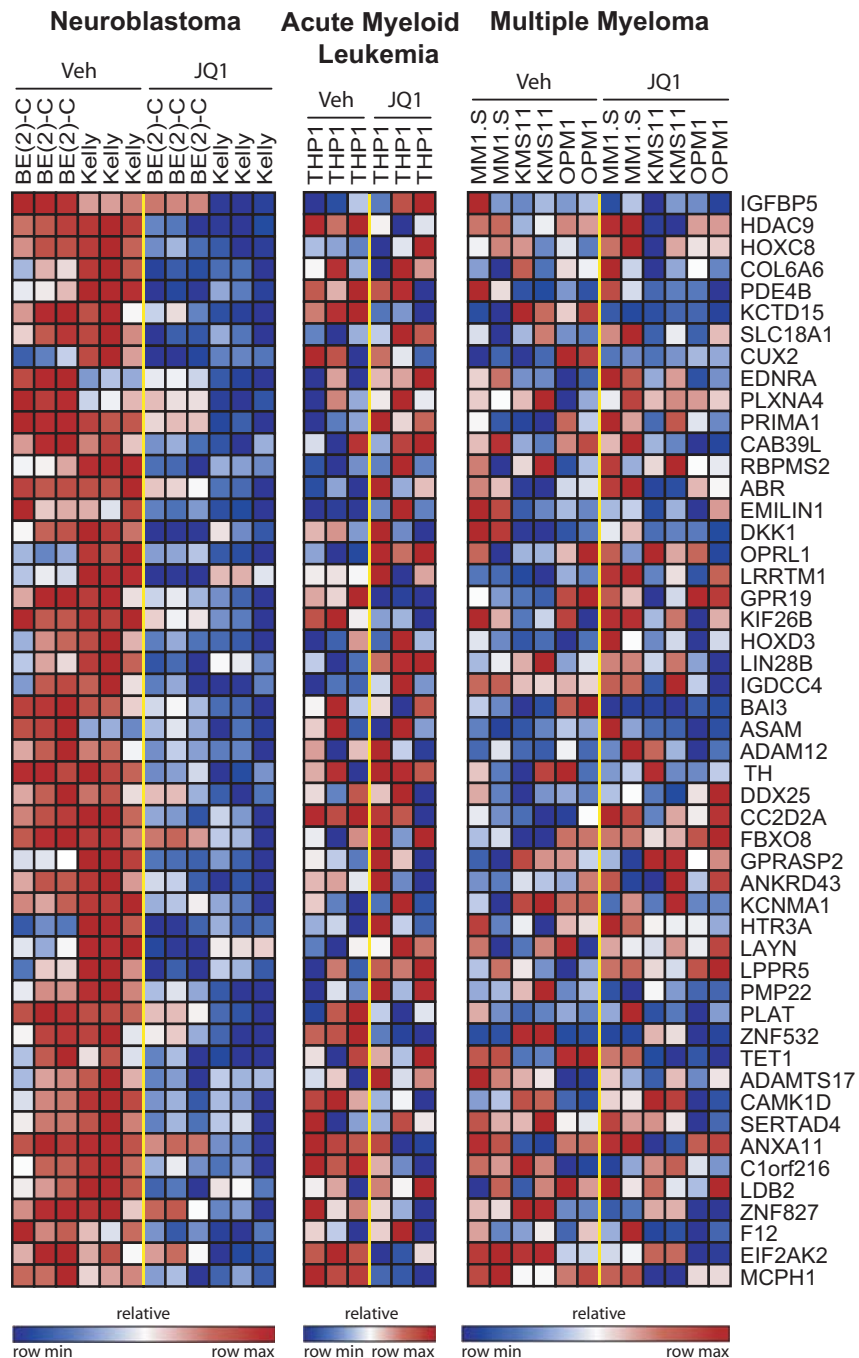



# Supplementary Figure 9

**A.**

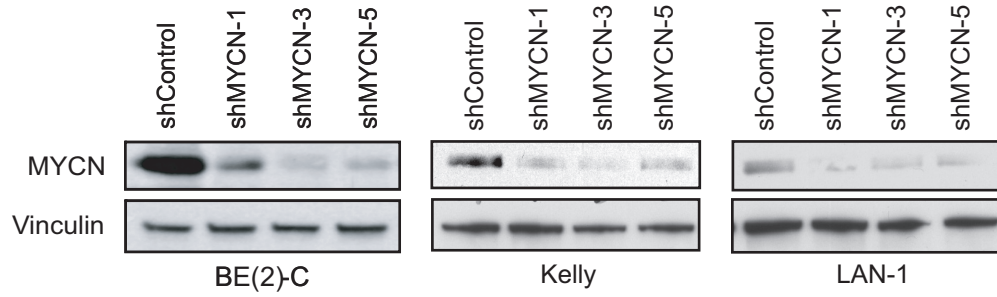

**B.**

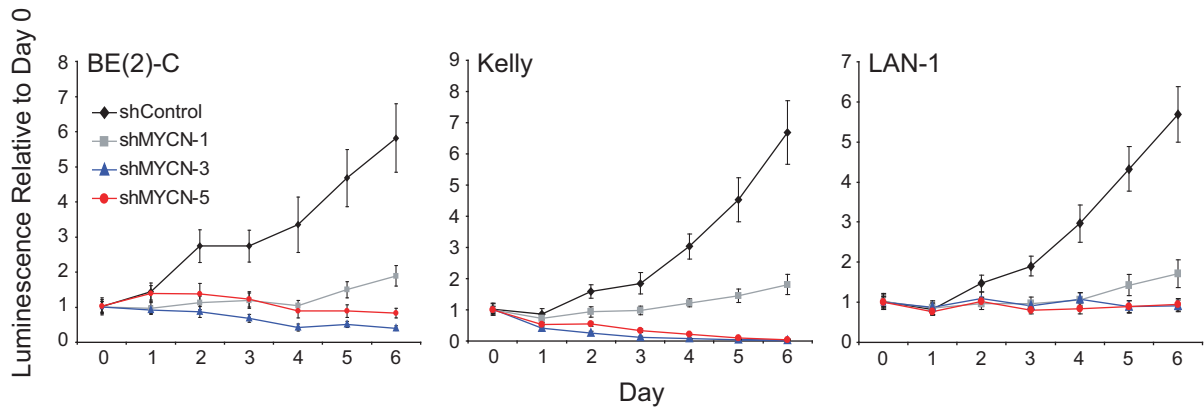

**C.**

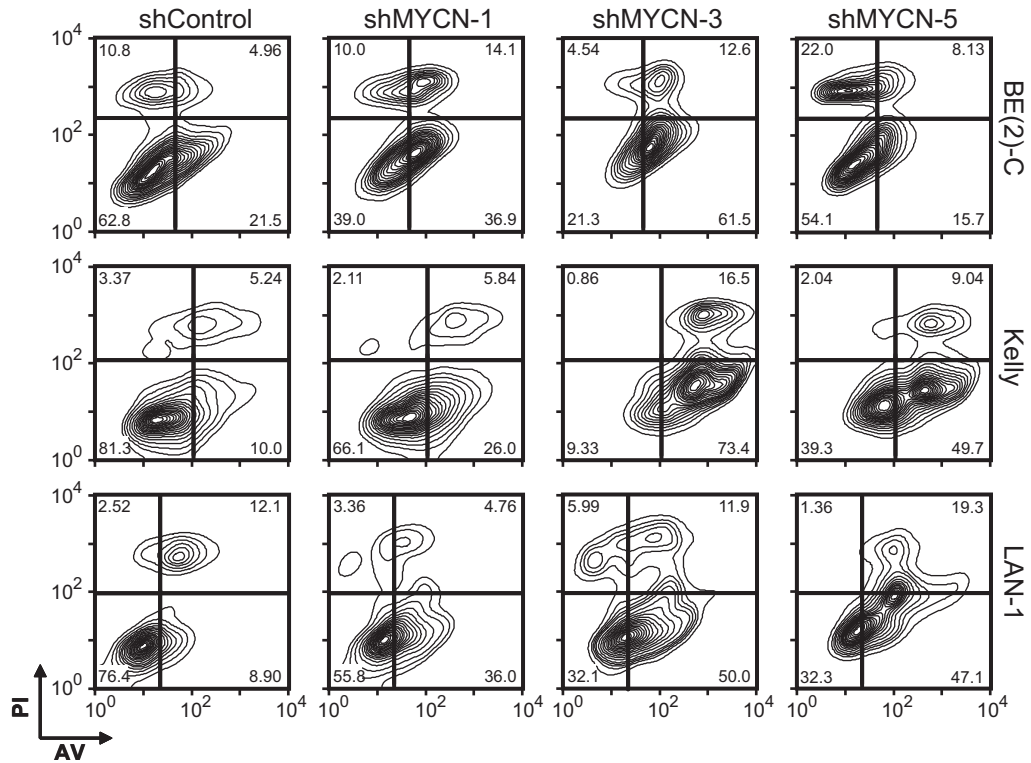

## Supplementary Figure 10

A.

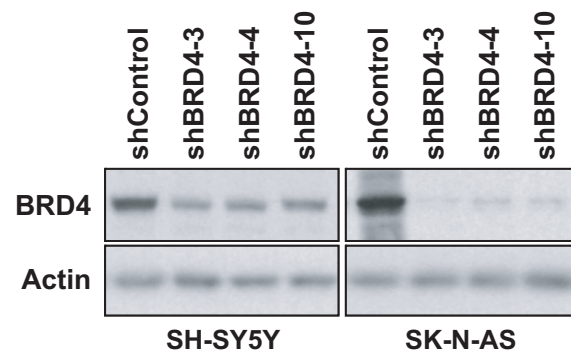

B.

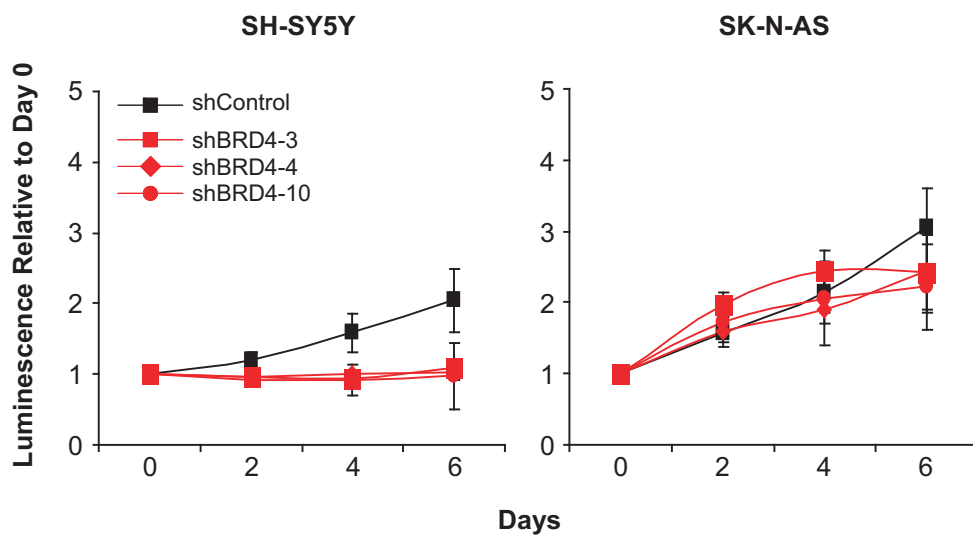

# Supplementary Figure 11

A.

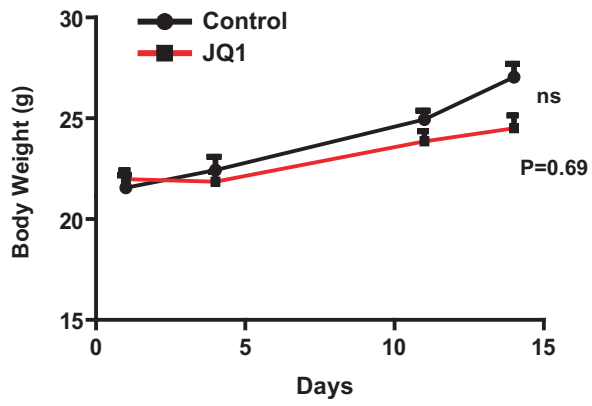

B.

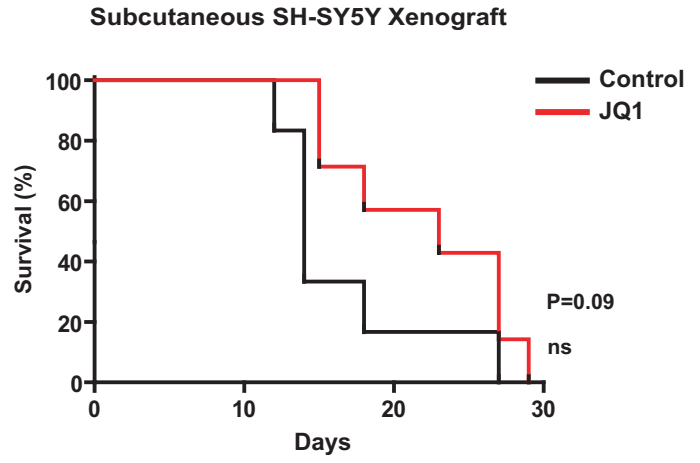

C.

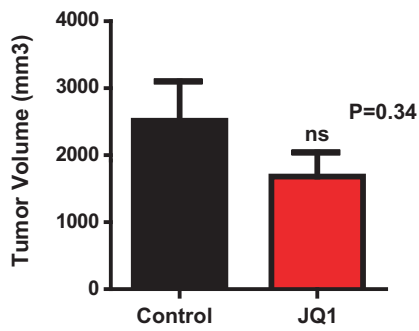

Supplement: NIHMS431744-supplement-2.pdf [file NIHMS431744-supplement-2.pdf]
