# Supplementary material
Source: PubMed Central journal article supplement (PMC3675888)
Supplement: NIHMS431744-supplement-3.pdf [file NIHMS431744-supplement-3.pdf]

**Supplementary Table S1. Sensitivity to JQ1 of a Collection of Cancer Cell Lines**

| #  | Cell_Line          | Organ         | Histology                   | MYCN Copy Number | LN_IC50 | EMax  |
|----|--------------------|---------------|-----------------------------|------------------|---------|-------|
| 1  | TGBC24TKB          | Biliary tract | Gall bladder                | 0<cn<8           | -1.436  | 0.049 |
| 2  | ETK-1              | Biliary tract | Adenocarcinoma              | 0<cn<8           | -0.665  | 0.411 |
| 3  | TGBC1TKB           | Biliary tract | Gall bladder                | 0<cn<8           | 2.220   | 0.644 |
| 4  | SW-1710            | Bladder       | Transitional cell carcinoma | 0<cn<8           | -2.839  | 0.112 |
| 5  | BFTC-905           | Bladder       | Transitional cell carcinoma | 0<cn<8           | -1.794  | 0.252 |
| 6  | SCaBER             | Bladder       | Squamous cell carcinoma     | -                | -1.650  | 0.209 |
| 7  | HT-1197            | Bladder       | Transitional cell carcinoma | 0<cn<8           | -1.441  | 0.182 |
| 8  | TCCSUP             | Bladder       | Transitional cell carcinoma | -                | -1.262  | 0.269 |
| 9  | 647-V              | Bladder       | Transitional cell carcinoma | 0<cn<8           | -1.161  | 0.232 |
| 10 | 639-V              | Bladder       | Transitional cell carcinoma | 0<cn<8           | -1.119  | 0.175 |
| 11 | EJ138              | Bladder       | Carcinoma                   | -                | -1.053  | 0.201 |
| 12 | DSH1               | Bladder       | Carcinoma                   | 0<cn<8           | -0.806  | 0.223 |
| 13 | CAL-29             | Bladder       | Transitional cell carcinoma | -                | -0.634  | 0.174 |
| 14 | LB831-BLC          | Bladder       | Carcinoma                   | 0<cn<8           | -0.416  | 0.303 |
| 15 | J82                | Bladder       | Transitional cell carcinoma | 0<cn<8           | -0.307  | 0.282 |
| 16 | 5637               | Bladder       | Carcinoma                   | -                | -0.295  | 0.342 |
| 17 | SW 780             | Bladder       | Transitional cell carcinoma | 0<cn<8           | 0.431   | 0.531 |
| 18 | RT-112             | Bladder       | Transitional cell carcinoma | 0<cn<8           | 0.956   | 0.543 |
| 19 | HT 1376            | Bladder       | Transitional cell carcinoma | 0<cn<8           | 1.413   | 0.580 |
| 20 | RT4                | Bladder       | Transitional cell carcinoma | 0<cn<8           | 1.455   | 0.551 |
| 21 | RT112/84           | Bladder       | Carcinoma                   | -                | 1.747   | 0.621 |
| 22 | KU-19-19           | Bladder       | Transitional cell carcinoma | 0<cn<8           | 2.353   | 0.739 |
| 23 | UM-UC-3            | Bladder       | Transitional cell carcinoma | -                | 2.882   | 0.763 |
| 24 | T24                | Bladder       | Transitional cell carcinoma | 0<cn<8           | 4.372   | 0.886 |
| 25 | MG-63              | Bone          | Sarcoma                     | 0<cn<8           | -2.587  | 0.248 |
| 26 | Saos-2             | Bone          | Sarcoma                     | 0<cn<8           | -2.123  | 0.139 |
| 27 | NOS-1              | Bone          | Sarcoma                     | -                | -1.906  | 0.214 |
| 28 | HuO9N2             | Bone          | Sarcoma                     | -                | -1.808  | 0.204 |
| 29 | U-2 OS             | Bone          | Sarcoma                     | 0<cn<8           | -1.577  | 0.206 |
| 30 | SJSA-1             | Bone          | Sarcoma                     | 0<cn<8           | -1.561  | 0.278 |
| 31 | CS1R               | Bone          | Unknown                     | -                | -1.261  | 0.282 |
| 32 | CAL-72             | Bone          | Sarcoma                     | -                | -1.119  | 0.363 |
| 33 | 143B PML BK TK     | Bone          | Sarcoma                     | -                | -0.576  | 0.330 |
| 34 | G-292 Clone A141B1 | Bone          | Sarcoma                     | -                | -0.524  | 0.431 |
| 35 | HOS                | Bone          | Sarcoma                     | 0<cn<8           | -0.123  | 0.339 |
| 36 | MHH-ES-1           | Bone          | Ewing's Sarcoma             | -                | 0.016   | 0.374 |
| 37 | KHOS-240S          | Bone          | Sarcoma                     | -                | 0.116   | 0.397 |
| 38 | OSA 80             | Bone          | Sarcoma                     | -                | 0.162   | 0.459 |
| 39 | CS1                | Bone          | Normal cells                | -                | 0.386   | 0.461 |
| 40 | KHOS-312H          | Bone          | Sarcoma                     | -                | 0.397   | 0.441 |
| 41 | EW-16              | Bone          | Ewing's Sarcoma             | 0<cn<8           | 0.720   | 0.386 |
| 42 | NY                 | Bone          | Sarcoma                     | -                | 0.757   | 0.539 |
| 43 | CHSA 0108          | Bone          | Sarcoma                     | -                | 1.036   | 0.577 |
| 44 | 143B               | Bone          | Sarcoma                     | 0<cn<8           | 1.158   | 0.593 |
| 45 | ES8                | Bone          | Ewing's Sarcoma             | 0<cn<8           | 1.212   | 0.175 |
| 46 | Sarc9371           | Bone          | Sarcoma                     | -                | 1.703   | 0.648 |
| 47 | ES4                | Bone          | Ewing's Sarcoma             | 0<cn<8           | 1.766   | 0.628 |
| 48 | ES6                | Bone          | Ewing's Sarcoma             | 0<cn<8           | 1.970   | 0.621 |
| 49 | CHSA8926           | Bone          | Sarcoma                     | -                | 2.745   | 0.665 |
| 50 | CAL-85-1           | Breast        | Adenocarcinoma              | 0<cn<8           | -2.723  | 0.059 |
| 51 | CAMA-1             | Breast        | Adenocarcinoma              | 0<cn<8           | -2.291  | 0.128 |
| 52 | HCC1395            | Breast        | Ductal carcinoma            | -                | -1.830  | 0.158 |
| 53 | HCC1428            | Breast        | Adenocarcinoma              | -                | -1.687  | 0.100 |
| 54 | HCC1569            | Breast        | Metastatic Carcinoma        | 0<cn<8           | -1.489  | 0.183 |
| 55 | HCC38              | Breast        | Ductal carcinoma            | -                | -1.422  | 0.215 |
| 56 | MDA-MB-330         | Breast        | Carcinoma                   | -                | -1.404  | 0.082 |
| 57 | MDA-MB-361         | Breast        | Adenocarcinoma              | 0<cn<8           | -1.306  | 0.126 |
| 58 | SK-BR-3            | Breast        | Carcinoma                   | -                | -1.143  | 0.286 |
| 59 | EFM-192B           | Breast        | Ductal carcinoma            | -                | -0.929  | 0.261 |
| 60 | OCUB-M             | Breast        | Carcinoma                   | 0<cn<8           | -0.822  | 0.080 |

| #   | Cell_Line      | Organ  | Histology               | MYCN Copy Number | LN_IC50 | EMax  |
|-----|----------------|--------|-------------------------|------------------|---------|-------|
| 61  | ZR-75-30       | Breast | Ductal carcinoma        | 0<cn<8           | -0.810  | 0.349 |
| 62  | MDA-MB-453     | Breast | Metastatic Carcinoma    | -                | -0.798  | 0.140 |
| 63  | BT-474         | Breast | Ductal carcinoma        | 0<cn<8           | -0.725  | 0.197 |
| 64  | MDA-MB-468     | Breast | Adenocarcinoma          | 0<cn<8           | -0.673  | 0.232 |
| 65  | HCC70          | Breast | Ductal carcinoma        | -                | -0.557  | 0.101 |
| 66  | HCC1419        | Breast | Ductal carcinoma        | 0<cn<8           | -0.496  | 0.264 |
| 67  | MB 157         | Breast | Carcinoma               | -                | -0.347  | 0.309 |
| 68  | EFM-192A       | Breast | Carcinoma               | -                | -0.178  | 0.377 |
| 69  | BT-549         | Breast | Ductal carcinoma        | -                | -0.124  | 0.341 |
| 70  | EFM-19         | Breast | Ductal carcinoma        | 0<cn<8           | 0.241   | 0.504 |
| 71  | MCF7           | Breast | Adenocarcinoma          | 0<cn<8           | 0.246   | 0.312 |
| 72  | SW527          | Breast | Carcinoma               | -                | 0.437   | 0.473 |
| 73  | JIMT-1         | Breast | Carcinoma               | -                | 0.509   | 0.471 |
| 74  | CAL-120        | Breast | Adenocarcinoma          | -                | 0.896   | 0.501 |
| 75  | ZR-75-1        | Breast | Ductal carcinoma        | -                | 1.135   | 0.463 |
| 76  | AU565          | Breast | Adenocarcinoma          | 0<cn<8           | 1.321   | 0.583 |
| 77  | MDA-MB-415     | Breast | Adenocarcinoma          | 0<cn<8           | 1.353   | 0.596 |
| 78  | HCC1806        | Breast | Ductal carcinoma        | -                | 1.487   | 0.624 |
| 79  | UACC-893       | Breast | Ductal carcinoma        | 0<cn<8           | 1.574   | 0.629 |
| 80  | MDA-MB-231     | Breast | Adenocarcinoma          | 0<cn<8           | 1.720   | 0.604 |
| 81  | EFM-192C       | Breast | Carcinoma               | -                | 1.742   | 0.532 |
| 82  | MDA-MB-436     | Breast | Adenocarcinoma          | -                | 1.997   | 0.659 |
| 83  | CAL-51         | Breast | Carcinoma               | 0<cn<8           | 2.021   | 0.637 |
| 84  | Hs 578T        | Breast | Ductal carcinoma        | 0<cn<8           | 2.036   | 0.695 |
| 85  | T47D           | Breast | Carcinoma               | -                | 2.102   | 0.692 |
| 86  | KPL-1          | Breast | Carcinoma               | -                | 2.152   | 0.671 |
| 87  | HCC1937        | Breast | Ductal carcinoma        | 0<cn<8           | 2.188   | 0.647 |
| 88  | HCC1143        | Breast | Ductal carcinoma        | -                | 2.391   | 0.603 |
| 89  | MDA-MB-175-VII | Breast | Ductal carcinoma        | 0<cn<8           | 2.660   | 0.731 |
| 90  | BT-20          | Breast | Ductal carcinoma        | 0<cn<8           | 3.146   | 0.794 |
| 91  | MT-3           | Breast | Carcinoma               | -                | 3.296   | 0.812 |
| 92  | HDQ-P1         | Breast | Carcinoma               | -                | 3.523   | 0.779 |
| 93  | HCC1954        | Breast | Ductal carcinoma        | 0<cn<8           | 3.615   | 0.847 |
| 94  | MDA-MB-435S    | Breast | Ductal carcinoma        | -                | 4.533   | 0.881 |
| 95  | DoTc2 4510     | Cervix | Carcinoma               | 0<cn<8           | -2.133  | 0.177 |
| 96  | Ca Ski         | Cervix | Squamous cell carcinoma | -                | -1.777  | 0.237 |
| 97  | SISO           | Cervix | Adenocarcinoma          | -                | -1.126  | 0.246 |
| 98  | MS751          | Cervix | Carcinoma               | -                | -0.936  | 0.239 |
| 99  | HT-3           | Cervix | Carcinoma               | -                | -0.735  | 0.296 |
| 100 | C-4 II         | Cervix | Carcinoma               | 0<cn<8           | -0.402  | 0.329 |
| 101 | CAL-39         | Cervix | Squamous cell carcinoma | -                | -0.186  | 0.392 |
| 102 | C-4 I          | Cervix | Carcinoma               | -                | 0.022   | 0.424 |
| 103 | ME-180         | Cervix | Carcinoma               | 0<cn<8           | 0.324   | 0.449 |
| 104 | SKG-IIIb       | Cervix | Squamous cell carcinoma | -                | 0.830   | 0.530 |
| 105 | C-33 A         | Cervix | Carcinoma               | -                | 0.856   | 0.531 |
| 106 | HeLa           | Cervix | Adenocarcinoma          | -                | 0.986   | 0.557 |
| 107 | SiHa           | Cervix | Squamous cell carcinoma | -                | 1.288   | 0.512 |
| 108 | SKG-IIIa       | Cervix | Carcinoma               | 0<cn<8           | 1.491   | 0.595 |
| 109 | SW756          | Cervix | Squamous cell carcinoma | 0<cn<8           | 1.647   | 0.650 |
| 110 | Hs 588.T       | Cervix | Adenocarcinoma          | -                | 2.125   | 0.712 |
| 111 | OMC-1          | Cervix | Squamous cell carcinoma | -                | 2.347   | 0.667 |
| 112 | BOKU           | Cervix | Squamous cell carcinoma | 0<cn<8           | 3.601   | 0.713 |
| 113 | 8-MG-BA        | CNS    | Glioblastoma            | 0<cn<8           | -2.886  | 0.045 |
| 114 | SVG p12        | CNS    | Glioblastoma            | -                | -2.224  | 0.145 |
| 115 | GI-1           | CNS    | Glioblastoma            | 0<cn<8           | -2.053  | 0.086 |
| 116 | no-10          | CNS    | Glioblastoma            | -                | -1.867  | 0.120 |
| 117 | D-566MG        | CNS    | Glioblastoma            | 0<cn<8           | -1.821  | 0.172 |
| 118 | SNB75          | CNS    | Glioblastoma            | 0<cn<8           | -1.700  | 0.325 |
| 119 | SK-MG-1        | CNS    | Glioblastoma            | 0<cn<8           | -1.654  | 0.110 |
| 120 | M059K          | CNS    | Glioblastoma            | -                | -1.621  | 0.220 |
| 121 | M059J          | CNS    | Glioblastoma            | 0<cn<8           | -1.597  | 0.096 |
| 122 | MOG-G-CCM      | CNS    | Astrocytoma             | 0<cn<8           | -1.459  | 0.114 |
| 123 | H4             | CNS    | Glioblastoma            | 0<cn<8           | -1.318  | 0.125 |
| 124 | KS-1           | CNS    | Glioblastoma            | 0<cn<8           | -1.309  | 0.363 |
| 125 | no-11          | CNS    | Glioblastoma            | -                | -1.175  | 0.144 |

| #   | Cell_Line  | Organ     | Histology               | MYCN Copy Number | LN_IC50 | EMax  |
|-----|------------|-----------|-------------------------|------------------|---------|-------|
| 126 | Daoy       | CNS       | Medulloblastoma         | 0<cn<8           | -0.992  | 0.174 |
| 127 | MOG-G-UVW  | CNS       | Astrocytoma             | 0<cn<8           | -0.917  | 0.310 |
| 128 | ONS-76     | CNS       | Medulloblastoma         | 0<cn<8           | -0.837  | 0.334 |
| 129 | LN-18      | CNS       | Glioblastoma            | -                | -0.814  | 0.294 |
| 130 | YKG-1      | CNS       | Glioblastoma            | -                | -0.809  | 0.315 |
| 131 | U-138 MG   | CNS       | Glioblastoma            | -                | -0.774  | 0.289 |
| 132 | 1321N1     | CNS       | Astrocytoma             | -                | -0.754  | 0.302 |
| 133 | SF-295     | CNS       | Glioblastoma            | 0<cn<8           | -0.575  | 0.374 |
| 134 | D-247MG    | CNS       | Glioblastoma            | 0<cn<8           | -0.500  | 0.329 |
| 135 | D-542MG    | CNS       | Glioblastoma            | 0<cn<8           | -0.483  | 0.364 |
| 136 | KALS-1     | CNS       | Glioblastoma            | 0<cn<8           | -0.448  | 0.384 |
| 137 | D-336MG    | CNS       | Glioblastoma            | 0<cn<8           | -0.423  | 0.366 |
| 138 | Hs 683     | CNS       | Glioblastoma            | -                | -0.205  | 0.437 |
| 139 | B2-17      | CNS       | Glioblastoma            | 0<cn<8           | -0.151  | 0.460 |
| 140 | D-392MG    | CNS       | Glioblastoma            | 0<cn<8           | -0.132  | 0.414 |
| 141 | D-423MG    | CNS       | Glioblastoma            | 0<cn<8           | -0.081  | 0.468 |
| 142 | T98G       | CNS       | Glioblastoma            | 0<cn<8           | 0.046   | 0.424 |
| 143 | LNZTA3WT4  | CNS       | Glioblastoma            | -                | 0.050   | 0.383 |
| 144 | GAMG       | CNS       | Glioblastoma            | 0<cn<8           | 0.070   | 0.451 |
| 145 | U373 MG    | CNS       | Glioblastoma            | -                | 0.270   | 0.237 |
| 146 | DK-MG      | CNS       | Glioblastoma            | 0<cn<8           | 0.436   | 0.561 |
| 147 | SW 1783    | CNS       | Astrocytoma             | -                | 0.489   | 0.363 |
| 148 | U-251 MG   | CNS       | Glioblastoma            | -                | 0.581   | 0.479 |
| 149 | KG-1-C     | CNS       | Glioblastoma            | -                | 0.720   | 0.428 |
| 150 | LNZTA3WT11 | CNS       | Glioblastoma            | -                | 0.750   | 0.528 |
| 151 | LN-229     | CNS       | Glioblastoma            | -                | 0.859   | 0.559 |
| 152 | SF126      | CNS       | Glioblastoma            | 0<cn<8           | 1.128   | 0.527 |
| 153 | YH-13      | CNS       | Glioblastoma            | 0<cn<8           | 1.144   | 0.568 |
| 154 | GB-1       | CNS       | Glioblastoma            | -                | 1.406   | 0.492 |
| 155 | DBTRG-05MG | CNS       | Glioblastoma            | 0<cn<8           | 1.498   | 0.610 |
| 156 | Becker     | CNS       | Glioblastoma            | 0<cn<8           | 1.518   | 0.608 |
| 157 | U-118 MG   | CNS       | Glioblastoma            | 0<cn<8           | 1.659   | 0.594 |
| 158 | A172       | CNS       | Glioblastoma            | 0<cn<8           | 1.661   | 0.636 |
| 159 | LN-405     | CNS       | Astrocytoma             | 0<cn<8           | 1.691   | 0.582 |
| 160 | 42-MG-BA   | CNS       | Glioblastoma            | -                | 1.866   | 0.620 |
| 161 | SF268      | CNS       | Glioblastoma            | 0<cn<8           | 1.881   | 0.622 |
| 162 | KNS-42     | CNS       | Glioblastoma            | 0<cn<8           | 2.122   | 0.694 |
| 163 | GOS-3      | CNS       | Astrocytoma             | -                | 2.953   | 0.769 |
| 164 | SNB-19     | CNS       | Glioblastoma            | 0<cn<8           | 3.372   | 0.762 |
| 165 | D-502MG    | CNS       | Glioblastoma            | 0<cn<8           | 3.391   | 0.798 |
| 166 | KNS-81-FD  | CNS       | Glioblastoma            | 0<cn<8           | 3.531   | 0.835 |
| 167 | CCF-STTG1  | CNS       | Astrocytoma             | 0<cn<8           | 3.806   | 0.752 |
| 168 | GMS-10     | CNS       | Glioblastoma            | -                | 4.065   | 0.898 |
| 169 | KINGS-1    | CNS       | Glioblastoma            | 0<cn<8           | 4.171   | 0.902 |
| 170 | SW 1088    | CNS       | Astrocytoma             | 0<cn<8           | 4.974   | 1.108 |
| 171 | D-263MG    | CNS       | Glioblastoma            | 0<cn<8           | 4.995   | 1.025 |
| 172 | KYSE-50    | Esophagus | Squamous cell carcinoma | -                | -2.620  | 0.057 |
| 173 | KYSE-270   | Esophagus | Squamous cell carcinoma | -                | -2.267  | 0.138 |
| 174 | KYSE-30    | Esophagus | Squamous cell carcinoma | -                | -1.807  | 0.126 |
| 175 | KYSE-150   | Esophagus | Squamous cell carcinoma | 0<cn<8           | -1.799  | 0.216 |
| 176 | OE21       | Esophagus | Squamous cell carcinoma | -                | -1.756  | 0.283 |
| 177 | T.T        | Esophagus | Squamous cell carcinoma | -                | -1.740  | 0.224 |
| 178 | KYSE-410   | Esophagus | Squamous cell carcinoma | 0<cn<8           | -1.605  | 0.345 |
| 179 | KYSE-450   | Esophagus | Squamous cell carcinoma | 0<cn<8           | -1.470  | 0.235 |
| 180 | T.Tn       | Esophagus | Squamous cell carcinoma | -                | -1.205  | 0.227 |
| 181 | TE-10      | Esophagus | Squamous cell carcinoma | 0<cn<8           | -0.969  | 0.360 |
| 182 | KYSE-510   | Esophagus | Squamous cell carcinoma | -                | -0.852  | 0.297 |
| 183 | KYSE-220   | Esophagus | Squamous cell carcinoma | -                | -0.848  | 0.301 |
| 184 | TE-15      | Esophagus | Squamous cell carcinoma | -                | -0.694  | 0.418 |
| 185 | TE-5       | Esophagus | Squamous cell carcinoma | 0<cn<8           | -0.318  | 0.400 |
| 186 | KYSE-180   | Esophagus | Squamous cell carcinoma | -                | -0.176  | 0.432 |
| 187 | TE7        | Esophagus | Adenocarcinoma          | -                | -0.053  | 0.388 |
| 188 | OE33       | Esophagus | Adenocarcinoma          | 0<cn<8           | -0.042  | 0.308 |
| 189 | KYSE-140   | Esophagus | Squamous cell carcinoma | 0<cn<8           | 0.008   | 0.360 |
| 190 | TE-11      | Esophagus | Squamous cell carcinoma | -                | 0.194   | 0.399 |

| #   | Cell_Line     | Organ       | Histology                    | MYCN Copy Number | LN_IC50 | EMax  |
|-----|---------------|-------------|------------------------------|------------------|---------|-------|
| 191 | COLO-680N     | Esophagus   | Squamous cell carcinoma      | 0<cn<8           | 0.309   | 0.439 |
| 192 | KYSE-520      | Esophagus   | Squamous cell carcinoma      | -                | 0.361   | 0.512 |
| 193 | OE19          | Esophagus   | Adenocarcinoma               | 0<cn<8           | 0.544   | 0.452 |
| 194 | TE-9          | Esophagus   | Squamous cell carcinoma      | 0<cn<8           | 0.616   | 0.419 |
| 195 | HCE7          | Esophagus   | Adenocarcinoma               | -                | 0.799   | 0.494 |
| 196 | KYSE-70       | Esophagus   | Squamous cell carcinoma      | 0<cn<8           | 1.028   | 0.558 |
| 197 | TE-12         | Esophagus   | Squamous cell carcinoma      | 0<cn<8           | 1.600   | 0.633 |
| 198 | TE-1          | Esophagus   | Squamous cell carcinoma      | 0<cn<8           | 2.378   | 0.669 |
| 199 | HCE-4         | Esophagus   | Squamous cell carcinoma      | 0<cn<8           | 3.764   | 0.878 |
| 200 | TE-8          | Esophagus   | Squamous cell carcinoma      | -                | 4.146   | 0.908 |
| 201 | PCI-4A        | Head & Neck | Squamous cell carcinoma      | -                | -3.544  | 0.075 |
| 202 | BB30-HNC      | Head & Neck | Squamous cell carcinoma      | -                | -2.763  | 0.325 |
| 203 | PCI-6A        | Head & Neck | Squamous cell carcinoma      | -                | -2.195  | 0.074 |
| 204 | Ca9-22        | Head & Neck | Carcinoma                    | 0<cn<8           | -2.169  | 0.082 |
| 205 | SCC-9         | Head & Neck | Squamous cell carcinoma      | 0<cn<8           | -2.154  | 0.380 |
| 206 | HSC-2         | Head & Neck | Squamous cell carcinoma      | -                | -1.874  | 0.214 |
| 207 | PCI-4B        | Head & Neck | Carcinoma                    | -                | -1.628  | 0.241 |
| 208 | H3118         | Head & Neck | Carcinoma                    | -                | -1.469  | 0.244 |
| 209 | KOSC-2 cl3-43 | Head & Neck | Squamous cell carcinoma      | -                | -1.445  | 0.177 |
| 210 | HSC-3         | Head & Neck | Squamous cell carcinoma      | 0<cn<8           | -1.425  | 0.342 |
| 211 | CAL-33        | Head & Neck | Squamous cell carcinoma      | 0<cn<8           | -1.270  | 0.327 |
| 212 | LB771-HNC     | Head & Neck | Squamous cell carcinoma      | -                | -1.214  | 0.286 |
| 213 | RPMI 2650     | Head & Neck | Squamous cell carcinoma      | 0<cn<8           | -1.064  | 0.338 |
| 214 | SCC-4         | Head & Neck | Squamous cell carcinoma      | -                | -0.938  | 0.224 |
| 215 | BICR 78       | Head & Neck | Squamous cell carcinoma      | -                | -0.859  | 0.364 |
| 216 | JHU-011       | Head & Neck | Squamous cell carcinoma      | -                | -0.854  | 0.280 |
| 217 | BHY           | Head & Neck | Squamous cell carcinoma      | 0<cn<8           | -0.802  | 0.340 |
| 218 | SCC-15        | Head & Neck | Squamous cell carcinoma      | 0<cn<8           | -0.796  | 0.400 |
| 219 | KON           | Head & Neck | Squamous cell carcinoma      | -                | -0.328  | 0.298 |
| 220 | Detroit 562   | Head & Neck | Carcinoma                    | -                | -0.234  | 0.373 |
| 221 | OSC-19        | Head & Neck | Squamous cell carcinoma      | -                | -0.230  | 0.232 |
| 222 | PCI-15        | Head & Neck | Squamous cell carcinoma      | -                | -0.152  | 0.447 |
| 223 | JHU-029       | Head & Neck | Squamous cell carcinoma      | -                | -0.136  | 0.308 |
| 224 | ACCS          | Head & Neck | Adenoid cystic carcinoma     | -                | -0.081  | 0.312 |
| 225 | FaDu          | Head & Neck | Squamous cell carcinoma      | -                | 0.434   | 0.511 |
| 226 | SCC-25        | Head & Neck | Squamous cell carcinoma      | 0<cn<8           | 0.435   | 0.557 |
| 227 | BICR 10       | Head & Neck | Squamous cell carcinoma      | -                | 0.545   | 0.670 |
| 228 | OSC-20        | Head & Neck | Squamous cell carcinoma      | -                | 0.651   | 0.526 |
| 229 | BICR 31       | Head & Neck | Squamous cell carcinoma      | -                | 1.026   | 0.551 |
| 230 | DOK           | Head & Neck | Dysplastic oral keratinocyte | -                | 1.123   | 0.571 |
| 231 | A253          | Head & Neck | Mucoepidermoid carcinoma     | 0<cn<8           | 1.126   | 0.473 |
| 232 | SAT           | Head & Neck | Squamous cell carcinoma      | -                | 1.496   | 0.527 |
| 233 | PCI-15A       | Head & Neck | Squamous cell carcinoma      | -                | 1.502   | 0.637 |
| 234 | PCI-38        | Head & Neck | Squamous cell carcinoma      | -                | 1.606   | 0.621 |
| 235 | HO-1-N-1      | Head & Neck | Squamous cell carcinoma      | -                | 1.623   | 0.567 |
| 236 | SACC-83       | Head & Neck | Adenoid cystic carcinoma     | -                | 2.158   | 0.700 |
| 237 | HO-1-u-1      | Head & Neck | Squamous cell carcinoma      | -                | 2.259   | 0.711 |
| 238 | CAL 27        | Head & Neck | Squamous cell carcinoma      | 0<cn<8           | 2.419   | 0.772 |
| 239 | ACC3          | Head & Neck | Adenoid cystic carcinoma     | -                | 2.425   | 0.719 |
| 240 | SAS           | Head & Neck | Squamous cell carcinoma      | 0<cn<8           | 2.615   | 0.795 |
| 241 | SKN-3         | Head & Neck | Squamous cell carcinoma      | -                | 2.980   | 0.742 |
| 242 | BICR 22       | Head & Neck | Squamous cell carcinoma      | -                | 4.008   | 0.777 |
| 243 | JHU-022       | Head & Neck | Squamous cell carcinoma      | -                | 4.042   | 0.896 |
| 244 | RKO           | Intestine   | Carcinoma                    | 0<cn<8           | -3.170  | 0.089 |
| 245 | Caco-2        | Intestine   | Adenocarcinoma               | -                | -2.844  | 0.061 |
| 246 | COLO 205      | Intestine   | Adenocarcinoma               | 0<cn<8           | -2.482  | 0.039 |
| 247 | Gp2D          | Intestine   | Adenocarcinoma               | 0<cn<8           | -2.183  | 0.161 |
| 248 | C170          | Intestine   | Carcinoma                    | -                | -2.084  | 0.155 |
| 249 | LS-411N       | Intestine   | Adenocarcinoma               | 0<cn<8           | -2.061  | 0.033 |
| 250 | HT-29         | Intestine   | Adenocarcinoma               | 0<cn<8           | -1.923  | 0.156 |
| 251 | HCT 116       | Intestine   | Carcinoma                    | 0<cn<8           | -1.856  | 0.207 |
| 252 | HRT-18        | Intestine   | Adenocarcinoma               | -                | -1.715  | 0.139 |
| 253 | WiDr          | Intestine   | Adenocarcinoma               | -                | -1.691  | 0.199 |
| 254 | Hs 257.T      | Intestine   | Adenocarcinoma               | -                | -1.593  | 0.162 |
| 255 | GP5d          | Intestine   | Adenocarcinoma               | 0<cn<8           | -1.121  | 0.291 |

| #   | Cell_Line   | Organ     | Histology                            | MYCN Copy Number | LN_IC50 | EMax  |
|-----|-------------|-----------|--------------------------------------|------------------|---------|-------|
| 256 | HCT-15      | Intestine | Adenocarcinoma                       | 0<cn<8           | -1.075  | 0.191 |
| 257 | COLO 201    | Intestine | Adenocarcinoma                       | -                | -0.949  | 0.301 |
| 258 | NCI-H747    | Intestine | Adenocarcinoma                       | 0<cn<8           | -0.659  | 0.285 |
| 259 | LS174T      | Intestine | Adenocarcinoma                       | 0<cn<8           | -0.293  | 0.287 |
| 260 | LoVo        | Intestine | Adenocarcinoma                       | -                | -0.166  | 0.220 |
| 261 | HCC2998     | Intestine | Adenocarcinoma                       | 0<cn<8           | -0.143  | 0.213 |
| 262 | SW 48       | Intestine | Adenocarcinoma                       | 0<cn<8           | -0.012  | 0.432 |
| 263 | HUTU-80     | Intestine | Adenocarcinoma                       | 0<cn<8           | 0.087   | 0.383 |
| 264 | SNU-C2B     | Intestine | Adenocarcinoma                       | 0<cn<8           | 0.218   | 0.431 |
| 265 | HCT-8       | Intestine | Adenocarcinoma                       | -                | 0.753   | 0.412 |
| 266 | HT115       | Intestine | Carcinoma                            | -                | 0.785   | 0.479 |
| 267 | RCM-1       | Intestine | Adenocarcinoma                       | 0<cn<8           | 0.838   | 0.496 |
| 268 | SW620       | Intestine | Adenocarcinoma                       | 0<cn<8           | 0.884   | 0.506 |
| 269 | COLO-678    | Intestine | Carcinoma                            | -                | 1.075   | 0.603 |
| 270 | SW 1463     | Intestine | Adenocarcinoma                       | 0<cn<8           | 1.350   | 0.572 |
| 271 | SW837       | Intestine | Adenocarcinoma                       | 0<cn<8           | 1.427   | 0.629 |
| 272 | CaR-1       | Intestine | Adenocarcinoma                       | 0<cn<8           | 1.812   | 0.639 |
| 273 | COLO 741    | Intestine | Carcinoma                            | 0<cn<8           | 2.649   | 0.716 |
| 274 | OUMS-23     | Intestine | Carcinoma                            | -                | 2.784   | 0.777 |
| 275 | LS-1034     | Intestine | Adenocarcinoma                       | 0<cn<8           | 2.958   | 0.783 |
| 276 | HT55        | Intestine | Carcinoma                            | 0<cn<8           | 3.134   | 0.752 |
| 277 | LS-123      | Intestine | Adenocarcinoma                       | -                | 3.333   | 0.758 |
| 278 | SK-CO-1     | Intestine | Adenocarcinoma                       | 0<cn<8           | 3.818   | 0.892 |
| 279 | RCC10RGB    | Kidney    | Carcinoma                            | 0<cn<8           | -3.572  | 0.283 |
| 280 | A498        | Kidney    | Carcinoma                            | 0<cn<8           | -2.912  | 0.081 |
| 281 | 786-O       | Kidney    | Clear cell renal cell adenocarcinoma | 0<cn<8           | -2.360  | 0.183 |
| 282 | Caki-1      | Kidney    | Clear cell renal cell adenocarcinoma | 0<cn<8           | -2.005  | 0.317 |
| 283 | UO-31       | Kidney    | Carcinoma                            | -                | -1.758  | 0.356 |
| 284 | G-402       | Kidney    | Leiomyblastoma                       | 0<cn<8           | -1.699  | 0.140 |
| 285 | VMRC-RCZ    | Kidney    | Carcinoma                            | 0<cn<8           | -1.618  | 0.230 |
| 286 | 769-P       | Kidney    | Clear cell renal cell adenocarcinoma | -                | -1.206  | 0.221 |
| 287 | OS-RC-2     | Kidney    | Carcinoma                            | 0<cn<8           | -0.232  | 0.434 |
| 288 | BFTC-909    | Kidney    | Transitional cell carcinoma          | 0<cn<8           | -0.040  | 0.391 |
| 289 | TK10        | Kidney    | Carcinoma                            | -                | 0.015   | 0.445 |
| 290 | ACHN        | Kidney    | Adenocarcinoma                       | 0<cn<8           | 0.079   | 0.422 |
| 291 | HA7-RCC     | Kidney    | Carcinoma                            | 0<cn<8           | 0.526   | 0.372 |
| 292 | LB996-RCC   | Kidney    | Carcinoma                            | 0<cn<8           | 0.905   | 0.547 |
| 293 | KMRC-1      | Kidney    | Carcinoma                            | -                | 1.146   | 0.529 |
| 294 | SW 13       | Kidney    | Adrenal cortex adenocarcinoma        | -                | 1.282   | 0.537 |
| 295 | LB1047-RCC  | Kidney    | Carcinoma                            | 0<cn<8           | 1.754   | 0.638 |
| 296 | SN-12C      | Kidney    | Carcinoma                            | 0<cn<8           | 1.800   | 0.571 |
| 297 | G-401       | Kidney    | Rhabdoid tumor                       | 0<cn<8           | 2.085   | 0.672 |
| 298 | LB2241-RCC  | Kidney    | Carcinoma                            | 0<cn<8           | 2.473   | 0.618 |
| 299 | BB65-RCC    | Kidney    | Carcinoma                            | 0<cn<8           | 2.737   | 0.674 |
| 300 | RXF393      | Kidney    | Carcinoma                            | 0<cn<8           | 3.902   | 0.768 |
| 301 | A704        | Kidney    | Carcinoma                            | 0<cn<8           | 5.386   | 0.929 |
| 302 | SNU-398     | Liver     | Carcinoma                            | -                | -1.812  | 0.233 |
| 303 | SNU-387     | Liver     | Carcinoma                            | 0<cn<8           | -1.676  | 0.287 |
| 304 | HuH-7       | Liver     | Carcinoma                            | 0<cn<8           | -1.669  | 0.098 |
| 305 | HuCCT1      | Liver     | Extrahepatic cholangiocarcinoma      | 0<cn<8           | -1.641  | 0.282 |
| 306 | Hep 3B2.1-7 | Liver     | Carcinoma                            | -                | -1.513  | 0.229 |
| 307 | JHH-1       | Liver     | Carcinoma                            | -                | -1.489  | 0.278 |
| 308 | SNU-182     | Liver     | Carcinoma                            | -                | -1.276  | 0.205 |
| 309 | JHH-6       | Liver     | Carcinoma                            | -                | -0.452  | 0.413 |
| 310 | SNU-423     | Liver     | Carcinoma                            | 0<cn<8           | -0.303  | 0.345 |
| 311 | HLE         | Liver     | Carcinoma                            | 0<cn<8           | -0.104  | 0.329 |
| 312 | SK-HEP-1    | Liver     | Adenocarcinoma                       | 0<cn<8           | 0.124   | 0.422 |
| 313 | JHH-7       | Liver     | Carcinoma                            | -                | 0.218   | 0.429 |
| 314 | C3A         | Liver     | Carcinoma                            | 0<cn<8           | 0.317   | 0.493 |
| 315 | SNU-449     | Liver     | Carcinoma                            | -                | 0.733   | 0.455 |
| 316 | JHH-4       | Liver     | Carcinoma                            | -                | 1.137   | 0.547 |
| 317 | Hep G2      | Liver     | Carcinoma                            | -                | 1.300   | 0.572 |
| 318 | HLF         | Liver     | Carcinoma                            | -                | 1.308   | 0.600 |
| 319 | EGI-1       | Liver     | Extrahepatic cholangiocarcinoma      | 0<cn<8           | 1.760   | 0.548 |
| 320 | PLC/PRF/5   | Liver     | Carcinoma                            | 0<cn<8           | 1.940   | 0.681 |

| #   | Cell_Line  | Organ      | Histology                          | MYCN Copy Number | LN_IC50 | EMax  |
|-----|------------|------------|------------------------------------|------------------|---------|-------|
| 321 | huH-1      | Liver      | Carcinoma                          | -                | 4.448   | 0.868 |
| 322 | HOP-62     | Lung       | Adenocarcinoma                     | 0<cn<8           | -2.110  | 0.171 |
| 323 | SBC-3      | Lung       | Small cell carcinoma               | -                | -2.005  | 0.093 |
| 324 | IA-LM      | Lung       | Large cell carcinoma               | 0<cn<8           | -1.831  | 0.230 |
| 325 | NCI-H727   | Lung       | Carcinoma                          | 0<cn<8           | -1.584  | 0.351 |
| 326 | UMC-11     | Lung       | Carcinoma                          | 0<cn<8           | -1.479  | 0.023 |
| 327 | H2052      | Lung       | Mesothelioma                       | cn ≥ 8           | -1.469  | 0.209 |
| 328 | DMS 273    | Lung       | Small cell carcinoma               | 0<cn<8           | -1.051  | 0.233 |
| 329 | LC-2-ad    | Lung       | Adenocarcinoma                     | -                | -0.857  | 0.358 |
| 330 | H2731      | Lung       | Mesothelioma                       | -                | -0.766  | 0.201 |
| 331 | LXF-289    | Lung       | Adenocarcinoma                     | -                | -0.219  | 0.316 |
| 332 | SBC-5      | Lung       | Small cell carcinoma               | 0<cn<8           | -0.211  | 0.305 |
| 333 | NCI-H157   | Lung       | Squamous cell carcinoma            | 0<cn<8           | -0.106  | 0.316 |
| 334 | H2369      | Lung       | Mesothelioma                       | -                | 0.201   | 0.461 |
| 335 | H2722      | Lung       | Mesothelioma                       | -                | 0.258   | 0.500 |
| 336 | Lu-135     | Lung       | Small cell carcinoma               | -                | 0.261   | 0.380 |
| 337 | H2461      | Lung       | Mesothelioma                       | -                | 0.275   | 0.349 |
| 338 | H2595      | Lung       | Mesothelioma                       | -                | 0.295   | 0.446 |
| 339 | SW 1271    | Lung       | Carcinoma                          | -                | 0.339   | 0.416 |
| 340 | H292       | Lung       | Pulmonary mucoepidermoid carcinoma | 0<cn<8           | 0.517   | 0.455 |
| 341 | H2804      | Lung       | Mesothelioma                       | -                | 0.577   | 0.475 |
| 342 | H2803      | Lung       | Mesothelioma                       | -                | 0.626   | 0.528 |
| 343 | H2596      | Lung       | Mesothelioma                       | -                | 0.673   | 0.456 |
| 344 | NCI-H196   | Lung       | Small cell carcinoma               | -                | 0.693   | 0.475 |
| 345 | Calu-6     | Lung       | Adenocarcinoma                     | 0<cn<8           | 0.699   | 0.441 |
| 346 | H2591      | Lung       | Mesothelioma                       | -                | 0.749   | 0.488 |
| 347 | NCI-H1355  | Lung       | Adenocarcinoma                     | 0<cn<8           | 0.980   | 0.528 |
| 348 | IST-MES1   | Lung       | Mesothelioma                       | -                | 1.031   | 0.506 |
| 349 | H2795      | Lung       | Mesothelioma                       | -                | 1.254   | 0.575 |
| 350 | NCI-H2126  | Lung       | Adenocarcinoma                     | 0<cn<8           | 1.262   | 0.589 |
| 351 | H2373      | Lung       | Mesothelioma                       | -                | 1.652   | 0.577 |
| 352 | DMS 53     | Lung       | Small cell carcinoma               | -                | 1.775   | 0.645 |
| 353 | H28        | Lung       | Mesothelioma                       | 0<cn<8           | 1.822   | 0.603 |
| 354 | H290       | Lung       | Mesothelioma                       | -                | 1.901   | 0.620 |
| 355 | NCI-H2452  | Lung       | Mesothelioma                       | 0<cn<8           | 2.242   | 0.663 |
| 356 | MPP-89     | Lung       | Mesothelioma                       | 0<cn<8           | 2.426   | 0.707 |
| 357 | EKVX       | Lung       | Adenocarcinoma                     | -                | 2.827   | 0.694 |
| 358 | H2869      | Lung       | Mesothelioma                       | -                | 2.940   | 0.676 |
| 359 | NCI-H841   | Lung       | Small cell carcinoma               | -                | 3.137   | 0.782 |
| 360 | NCI-H2286  | Lung       | Carcinoma                          | -                | 3.227   | 0.682 |
| 361 | H513       | Lung       | Mesothelioma                       | -                | 3.650   | 0.861 |
| 362 | COR-L 105  | Lung:NSCLC | Adenocarcinoma                     | 0<cn<8           | -2.297  | 0.264 |
| 363 | LCLC-97TM1 | Lung:NSCLC | Large cell carcinoma               | 0<cn<8           | -2.091  | 0.144 |
| 364 | BEN        | Lung:NSCLC | Carcinoma                          | 0<cn<8           | -1.965  | 0.071 |
| 365 | VMRC-LCP   | Lung:NSCLC | Squamous cell carcinoma            | cn ≥ 8           | -1.788  | 0.023 |
| 366 | NCI-H650   | Lung:NSCLC | Carcinoma                          | 0<cn<8           | -1.730  | 0.169 |
| 367 | LU65A      | Lung:NSCLC | Giant cell carcinoma               | -                | -1.578  | 0.134 |
| 368 | HCC-44     | Lung:NSCLC | Carcinoma                          | -                | -1.470  | 0.227 |
| 369 | LU99C      | Lung:NSCLC | Giant cell carcinoma               | -                | -1.300  | 0.073 |
| 370 | SK-MES-1   | Lung:NSCLC | Squamous cell carcinoma            | 0<cn<8           | -1.284  | 0.287 |
| 371 | NCI-H2009  | Lung:NSCLC | Adenocarcinoma                     | 0<cn<8           | -1.237  | 0.197 |
| 372 | NCI-H1437  | Lung:NSCLC | Adenocarcinoma                     | 0<cn<8           | -1.183  | 0.325 |
| 373 | NCI-H522   | Lung:NSCLC | Carcinoma                          | 0<cn<8           | -1.161  | 0.186 |
| 374 | NCI-H810   | Lung:NSCLC | Large cell carcinoma               | -                | -1.134  | 0.053 |
| 375 | NCI-H2342  | Lung:NSCLC | Adenocarcinoma                     | 0<cn<8           | -1.034  | 0.171 |
| 376 | LU99B      | Lung:NSCLC | Giant cell carcinoma               | -                | -0.934  | 0.268 |
| 377 | NCI-H1944  | Lung:NSCLC | Carcinoma                          | -                | -0.884  | 0.405 |
| 378 | LU65C      | Lung:NSCLC | Giant cell carcinoma               | -                | -0.823  | 0.229 |
| 379 | NCI-H2073  | Lung:NSCLC | Adenocarcinoma                     | -                | -0.796  | 0.355 |
| 380 | LCLC-103H  | Lung:NSCLC | Large cell carcinoma               | 0<cn<8           | -0.627  | 0.353 |
| 381 | NCI-H460   | Lung:NSCLC | Large cell carcinoma               | 0<cn<8           | -0.627  | 0.268 |
| 382 | NCI-H596   | Lung:NSCLC | Squamous cell carcinoma            | 0<cn<8           | -0.550  | 0.431 |
| 383 | 273T       | Lung:NSCLC | Squamous cell carcinoma            | -                | -0.484  | 0.366 |
| 384 | NCI-H1299  | Lung:NSCLC | Large cell carcinoma               | 0<cn<8           | -0.415  | 0.323 |
| 385 | NCI-H3122  | Lung:NSCLC | Adenocarcinoma                     | -                | -0.363  | 0.274 |

| #   | Cell_Line    | Organ         | Histology                      | MYCN Copy Number | LN_IC50 | EMax  |
|-----|--------------|---------------|--------------------------------|------------------|---------|-------|
| 386 | NCI-H1755    | Lung:NSCLC    | Adenocarcinoma                 | 0<cn<8           | -0.243  | 0.348 |
| 387 | NCI-H2122    | Lung:NSCLC    | Adenocarcinoma                 | -                | -0.214  | 0.283 |
| 388 | NCI-H1650    | Lung:NSCLC    | Carcinoma                      | -                | -0.145  | 0.423 |
| 389 | NCI-H2030    | Lung:NSCLC    | Adenocarcinoma                 | 0<cn<8           | -0.130  | 0.450 |
| 390 | ABC-1        | Lung:NSCLC    | Adenocarcinoma                 | 0<cn<8           | -0.047  | 0.403 |
| 391 | 201T         | Lung:NSCLC    | Adenocarcinoma                 | -                | 0.090   | 0.375 |
| 392 | Calu-3       | Lung:NSCLC    | Adenocarcinoma                 | -                | 0.092   | 0.452 |
| 393 | SK-LU-1      | Lung:NSCLC    | Adenocarcinoma                 | 0<cn<8           | 0.186   | 0.376 |
| 394 | NCI-H2347    | Lung:NSCLC    | Carcinoma                      | 0<cn<8           | 0.236   | 0.469 |
| 395 | NCI-H2085    | Lung:NSCLC    | Carcinoma                      | -                | 0.306   | 0.375 |
| 396 | LC-1 sq      | Lung:NSCLC    | Squamous cell carcinoma        | -                | 0.363   | 0.474 |
| 397 | HCC-366      | Lung:NSCLC    | Carcinoma                      | -                | 0.397   | 0.278 |
| 398 | NCI-H520     | Lung:NSCLC    | Squamous cell carcinoma        | 0<cn<8           | 0.442   | 0.356 |
| 399 | NCI-H322     | Lung:NSCLC    | Carcinoma                      | -                | 0.450   | 0.483 |
| 400 | NCI-H1693    | Lung:NSCLC    | Adenocarcinoma                 | 0<cn<8           | 0.505   | 0.522 |
| 401 | Calu-1       | Lung:NSCLC    | Carcinoma                      | 0<cn<8           | 0.569   | 0.483 |
| 402 | NCI-H2110    | Lung:NSCLC    | Carcinoma                      | -                | 0.578   | 0.491 |
| 403 | LU99A        | Lung:NSCLC    | Giant cell carcinoma           | 0<cn<8           | 0.618   | 0.186 |
| 404 | A549         | Lung:NSCLC    | Carcinoma                      | 0<cn<8           | 0.679   | 0.477 |
| 405 | NCI-H2023    | Lung:NSCLC    | Carcinoma                      | -                | 0.760   | 0.507 |
| 406 | NCI-H1734    | Lung:NSCLC    | Adenocarcinoma                 | 0<cn<8           | 0.783   | 0.466 |
| 407 | NCI-H1568    | Lung:NSCLC    | Carcinoma                      | -                | 0.832   | 0.534 |
| 408 | NCI-H1975    | Lung:NSCLC    | Adenocarcinoma                 | 0<cn<8           | 0.938   | 0.545 |
| 409 | NCI-H441     | Lung:NSCLC    | Carcinoma                      | 0<cn<8           | 1.008   | 0.494 |
| 410 | ChaGo-K-1    | Lung:NSCLC    | Carcinoma                      | -                | 1.009   | 0.526 |
| 411 | HCC-15       | Lung:NSCLC    | Carcinoma                      | -                | 1.034   | 0.532 |
| 412 | NCI-H2228    | Lung:NSCLC    | Adenocarcinoma                 | -                | 1.159   | 0.587 |
| 413 | NCI-H358     | Lung:NSCLC    | Carcinoma                      | 0<cn<8           | 1.174   | 0.554 |
| 414 | HARA         | Lung:NSCLC    | Squamous cell carcinoma        | -                | 1.187   | 0.587 |
| 415 | NCI-H1915    | Lung:NSCLC    | Carcinoma                      | -                | 1.226   | 0.540 |
| 416 | NCI-H2405    | Lung:NSCLC    | Adenocarcinoma                 | 0<cn<8           | 1.240   | 0.493 |
| 417 | DV-90        | Lung:NSCLC    | Adenocarcinoma                 | 0<cn<8           | 1.388   | 0.593 |
| 418 | NCI-H1651    | Lung:NSCLC    | Adenocarcinoma                 | -                | 1.503   | 0.528 |
| 419 | NCI-H1648    | Lung:NSCLC    | Adenocarcinoma                 | 0<cn<8           | 1.506   | 0.601 |
| 420 | NCI-H838     | Lung:NSCLC    | Carcinoma                      | 0<cn<8           | 1.578   | 0.514 |
| 421 | NCI-H661     | Lung:NSCLC    | Large cell carcinoma           | 0<cn<8           | 1.595   | 0.626 |
| 422 | PC-14        | Lung:NSCLC    | Adenocarcinoma                 | 0<cn<8           | 1.637   | 0.606 |
| 423 | COR-L23      | Lung:NSCLC    | Large cell carcinoma           | 0<cn<8           | 1.681   | 0.678 |
| 424 | PC-3 [JPC-3] | Lung:NSCLC    | Adenocarcinoma                 | -                | 1.723   | 0.596 |
| 425 | NCI-H2172    | Lung:NSCLC    | Carcinoma                      | -                | 1.723   | 0.597 |
| 426 | NCI-H1435    | Lung:NSCLC    | Carcinoma                      | -                | 1.830   | 0.638 |
| 427 | NCI-H1993    | Lung:NSCLC    | Adenocarcinoma                 | 0<cn<8           | 1.880   | 0.614 |
| 428 | RERF-LC-MS   | Lung:NSCLC    | Adenocarcinoma                 | 0<cn<8           | 1.917   | 0.643 |
| 429 | NCI-H1793    | Lung:NSCLC    | Adenocarcinoma                 | 0<cn<8           | 1.929   | 0.635 |
| 430 | HOP92        | Lung:NSCLC    | Large cell carcinoma           | 0<cn<8           | 2.012   | 0.683 |
| 431 | NCI-H2170    | Lung:NSCLC    | Squamous cell carcinoma        | 0<cn<8           | 2.091   | 0.590 |
| 432 | NCI-H1703    | Lung:NSCLC    | Squamous cell carcinoma        | 0<cn<8           | 2.132   | 0.682 |
| 433 | LK-2         | Lung:NSCLC    | Squamous cell carcinoma        | -                | 2.140   | 0.628 |
| 434 | SW 1573      | Lung:NSCLC    | Adenocarcinoma                 | 0<cn<8           | 2.189   | 0.704 |
| 435 | CAL-12T      | Lung:NSCLC    | Carcinoma                      | 0<cn<8           | 2.205   | 0.722 |
| 436 | NCI-H1792    | Lung:NSCLC    | Adenocarcinoma                 | 0<cn<8           | 2.367   | 0.664 |
| 437 | NCI-H1781    | Lung:NSCLC    | Adenocarcinoma                 | -                | 2.701   | 0.755 |
| 438 | SW 900       | Lung:NSCLC    | Squamous cell carcinoma        | -                | 2.920   | 0.789 |
| 439 | HCC-827      | Lung:NSCLC    | Carcinoma                      | -                | 3.042   | 0.810 |
| 440 | RERF-LC-Sq1  | Lung:NSCLC    | Squamous cell carcinoma        | -                | 3.572   | 0.862 |
| 441 | NCI-H1623    | Lung:NSCLC    | Adenocarcinoma                 | 0<cn<8           | 3.821   | 0.867 |
| 442 | NCI-H1563    | Lung:NSCLC    | Adenocarcinoma                 | -                | 4.073   | 0.919 |
| 443 | SW982        | Misc          | Sarcoma                        | 0<cn<8           | -1.756  | 0.341 |
| 444 | SK-LMS-1     | Misc          | Sarcoma                        | 0<cn<8           | -1.705  | 0.110 |
| 445 | SW872        | Misc          | Liposarcoma                    | 0<cn<8           | -1.055  | 0.134 |
| 446 | VA-ES-BJ     | Misc          | Sarcoma                        | 0<cn<8           | -0.395  | 0.368 |
| 447 | SW684        | Misc          | Fibrosarcoma                   | 0<cn<8           | 0.681   | 0.498 |
| 448 | MFH-ino      | Misc          | Malignant fibrous histiocytoma | 0<cn<8           | 1.731   | 0.644 |
| 449 | BeWo         | Miscellaneous | Choriocarcinoma                | -                | -1.480  | 0.093 |
| 450 | Hs 633T      | Miscellaneous | Fibrosarcoma                   | -                | -1.375  | 0.181 |

| #   | Cell_Line   | Organ         | Histology                      | MYCN Copy Number | LN_IC50 | EMax  |
|-----|-------------|---------------|--------------------------------|------------------|---------|-------|
| 451 | HT 1080     | Miscellaneous | Fibrosarcoma                   | 0<cn<8           | 0.584   | 0.462 |
| 452 | GCT         | Miscellaneous | Malignant fibrous histiocytoma | 0<cn<8           | 0.840   | 0.505 |
| 453 | SK-UT-1     | Muscle        | Leiomyosarcoma                 | -                | -1.573  | 0.201 |
| 454 | A-204       | Muscle        | Rhabdomyosarcoma               | 0<cn<8           | -1.503  | 0.190 |
| 455 | RH-30       | Muscle        | Rhabdomyosarcoma               | -                | -1.414  | 0.156 |
| 456 | RD          | Muscle        | Rhabdomyosarcoma               | 0<cn<8           | -0.344  | 0.227 |
| 457 | OVTOKO      | Ovary         | Adenocarcinoma                 | -                | -3.599  | 0.146 |
| 458 | IGROV-1     | Ovary         | Carcinoma                      | 0<cn<8           | -3.390  | 0.078 |
| 459 | FU-OV-1     | Ovary         | Carcinoma                      | -                | -2.114  | 0.216 |
| 460 | KGN         | Ovary         | Granulosa cell tumor           | 0<cn<8           | -1.907  | 0.247 |
| 461 | OC-314      | Ovary         | Carcinoma                      | -                | -1.906  | 0.188 |
| 462 | SK-OV-3     | Ovary         | Adenocarcinoma                 | 0<cn<8           | -1.344  | 0.337 |
| 463 | OVMIU       | Ovary         | Adenocarcinoma                 | -                | -1.213  | 0.159 |
| 464 | PA-1        | Ovary         | Teratocarcinoma                | 0<cn<8           | -0.812  | 0.037 |
| 465 | EFO-27      | Ovary         | Adenocarcinoma                 | 0<cn<8           | -0.718  | 0.383 |
| 466 | OVCAR-8     | Ovary         | Carcinoma                      | 0<cn<8           | -0.646  | 0.217 |
| 467 | MDA-H2774   | Ovary         | Carcinoma                      | -                | -0.475  | 0.252 |
| 468 | KURAMOCHI   | Ovary         | Carcinoma                      | 0<cn<8           | -0.471  | 0.420 |
| 469 | SW 626      | Ovary         | Adenocarcinoma                 | -                | -0.444  | 0.406 |
| 470 | RMG-I       | Ovary         | Mesonephroid adenocarcinoma    | 0<cn<8           | -0.432  | 0.372 |
| 471 | OVISE       | Ovary         | Adenocarcinoma                 | -                | -0.419  | 0.329 |
| 472 | EFO-21      | Ovary         | Carcinoma                      | -                | -0.395  | 0.395 |
| 473 | NCI/ADR-RES | Ovary         | Carcinoma                      | 0<cn<8           | -0.036  | 0.399 |
| 474 | NIH:OVCAR-3 | Ovary         | Adenocarcinoma                 | 0<cn<8           | 0.027   | 0.301 |
| 475 | OVCAR-4     | Ovary         | Carcinoma                      | 0<cn<8           | 0.040   | 0.384 |
| 476 | A2780cis    | Ovary         | Carcinoma                      | -                | 0.088   | 0.479 |
| 477 | TOV-21G     | Ovary         | Adenocarcinoma                 | -                | 0.139   | 0.383 |
| 478 | OV-90       | Ovary         | Adenocarcinoma                 | -                | 0.441   | 0.439 |
| 479 | OAW42       | Ovary         | Carcinoma                      | 0<cn<8           | 0.468   | 0.526 |
| 480 | OVCAR-5     | Ovary         | Carcinoma                      | 0<cn<8           | 0.865   | 0.542 |
| 481 | OVSAYO      | Ovary         | Adenocarcinoma                 | -                | 1.119   | 0.505 |
| 482 | RKN         | Ovary         | Myoma                          | -                | 1.205   | 0.579 |
| 483 | MCAS        | Ovary         | Adenocarcinoma                 | -                | 1.314   | 0.552 |
| 484 | TYK-nu      | Ovary         | Carcinoma                      | -                | 2.290   | 0.648 |
| 485 | OAW28       | Ovary         | Carcinoma                      | -                | 2.338   | 0.698 |
| 486 | A2780ADR    | Ovary         | Carcinoma                      | -                | 3.357   | 0.696 |
| 487 | OVKATE      | Ovary         | Adenocarcinoma                 | -                | 3.664   | 0.887 |
| 488 | SUIT-2      | Pancreas      | Adenocarcinoma                 | -                | -2.202  | 0.184 |
| 489 | BxPC-3      | Pancreas      | Adenocarcinoma                 | 0<cn<8           | -2.183  | 0.254 |
| 490 | PL18        | Pancreas      | Carcinoma                      | -                | -0.772  | 0.304 |
| 491 | CFPAC-1     | Pancreas      | Adenocarcinoma                 | 0<cn<8           | -0.704  | 0.343 |
| 492 | MZ1-PC      | Pancreas      | Carcinoma                      | -                | -0.624  | 0.353 |
| 493 | Panc 08.13  | Pancreas      | Adenocarcinoma                 | 0<cn<8           | -0.612  | 0.141 |
| 494 | SU.86.86    | Pancreas      | Adenocarcinoma                 | -                | -0.559  | 0.403 |
| 495 | KP-1NL      | Pancreas      | Carcinoma                      | -                | -0.549  | 0.300 |
| 496 | PA-TU-8988T | Pancreas      | Adenocarcinoma                 | -                | -0.513  | 0.313 |
| 497 | MIA PaCa-2  | Pancreas      | Adenocarcinoma                 | -                | -0.424  | 0.262 |
| 498 | Panc 02.03  | Pancreas      | Adenocarcinoma                 | -                | -0.249  | 0.385 |
| 499 | HUP-T4      | Pancreas      | Carcinoma                      | 0<cn<8           | -0.123  | 0.373 |
| 500 | Panc 10.05  | Pancreas      | Adenocarcinoma                 | 0<cn<8           | -0.122  | 0.351 |
| 501 | HPAF-II     | Pancreas      | Adenocarcinoma                 | 0<cn<8           | -0.043  | 0.504 |
| 502 | KP-1N       | Pancreas      | Carcinoma                      | -                | 0.144   | 0.337 |
| 503 | A13A        | Pancreas      | Carcinoma                      | -                | 0.338   | 0.400 |
| 504 | Hs 766T     | Pancreas      | Adenocarcinoma                 | -                | 0.472   | 0.477 |
| 505 | 1108-MP2    | Pancreas      | Adenocarcinoma                 | -                | 0.800   | 0.543 |
| 506 | 617-MP17    | Pancreas      | Adenosquamous carcinoma        | -                | 0.930   | 0.496 |
| 507 | PL45        | Pancreas      | Adenocarcinoma                 | -                | 1.250   | 0.547 |
| 508 | Panc 04.03  | Pancreas      | Adenocarcinoma                 | -                | 1.301   | 0.570 |
| 509 | 950-MP5     | Pancreas      | IPMN                           | -                | 1.391   | 0.639 |
| 510 | 609MP9      | Pancreas      | Adenocarcinoma                 | -                | 1.428   | 0.597 |
| 511 | SW 1990     | Pancreas      | Adenocarcinoma                 | 0<cn<8           | 1.454   | 0.576 |
| 512 | HUP-T3      | Pancreas      | Carcinoma                      | 0<cn<8           | 1.460   | 0.620 |
| 513 | PL4         | Pancreas      | Carcinoma                      | -                | 1.957   | 0.732 |
| 514 | PA-TU-8902  | Pancreas      | Adenocarcinoma                 | -                | 2.104   | 0.672 |
| 515 | Panc 03.27  | Pancreas      | Adenocarcinoma                 | 0<cn<8           | 2.222   | 0.728 |

| #   | Cell_Line   | Organ    | Histology               | MYCN Copy Number | LN_IC50 | EMax  |
|-----|-------------|----------|-------------------------|------------------|---------|-------|
| 516 | AsPC-1      | Pancreas | Adenocarcinoma          | 0<cn<8           | 2.464   | 0.731 |
| 517 | YAPC        | Pancreas | Carcinoma               | 0<cn<8           | 2.550   | 0.747 |
| 518 | PANC-1      | Pancreas | Adenocarcinoma          | -                | 2.595   | 0.603 |
| 519 | DAN-G       | Pancreas | Adenocarcinoma          | -                | 2.798   | 0.782 |
| 520 | Capan-2     | Pancreas | Adenocarcinoma          | 0<cn<8           | 3.905   | 0.588 |
| 521 | PSN1        | Pancreas | Carcinoma               | 0<cn<8           | 5.655   | 1.118 |
| 522 | NB69        | PNS      | Neuroblastoma           | cn ≥ 8           | -2.197  | 0.071 |
| 523 | CHP-212     | PNS      | Neuroblastoma           | cn ≥ 8           | -2.079  | 0.056 |
| 524 | ACN         | PNS      | Neuroblastoma           | 0<cn<8           | -1.956  | 0.224 |
| 525 | NB16        | PNS      | Neuroblastoma           | 0<cn<8           | -1.256  | 0.170 |
| 526 | BE(2)-C     | PNS      | Neuroblastoma           | -                | -1.092  | 0.075 |
| 527 | MC-IXC      | PNS      | Neuroepithelia          | 0<cn<8           | -1.021  | 0.029 |
| 528 | SK-N-SH     | PNS      | Neuroblastoma           | 0<cn<8           | -0.931  | 0.245 |
| 529 | NB12        | PNS      | Neuroblastoma           | 0<cn<8           | -0.342  | 0.266 |
| 530 | GI-ME-N     | PNS      | Neuroblastoma           | 0<cn<8           | 0.281   | 0.459 |
| 531 | SK-N-AS     | PNS      | Neuroblastoma           | 0<cn<8           | 1.485   | 0.598 |
| 532 | BPH-1       | Prostate | Benign                  | 0<cn<8           | -3.418  | 0.058 |
| 533 | DU 145      | Prostate | Adenocarcinoma          | 0<cn<8           | -0.088  | 0.413 |
| 534 | 22RV1       | Prostate | Adenocarcinoma          | 0<cn<8           | 0.030   | 0.545 |
| 535 | PC-3        | Prostate | Adenocarcinoma          | 0<cn<8           | 2.546   | 0.682 |
| 536 | HCE-T       | Sinus    | Squamous cell carcinoma | 0<cn<8           | 1.376   | 0.546 |
| 537 | COLO-679    | Skin     | Melanoma                | 0<cn<8           | -2.967  | 0.092 |
| 538 | MEL-HO      | Skin     | Melanoma                | 0<cn<8           | -2.461  | 0.131 |
| 539 | MGH-ST-1    | Skin     | Melanoma                | -                | -2.235  | 0.084 |
| 540 | WM35        | Skin     | Melanoma                | -                | -2.012  | 0.072 |
| 541 | CHL-1       | Skin     | Melanoma                | 0<cn<8           | -2.003  | 0.171 |
| 542 | 451Lu       | Skin     | Melanoma                | -                | -1.932  | 0.191 |
| 543 | MGH-PO-1    | Skin     | Melanoma                | -                | -1.918  | 0.115 |
| 544 | MGH-BO-1    | Skin     | Melanoma                | -                | -1.913  | 0.224 |
| 545 | SK-MEL-24   | Skin     | Melanoma                | 0<cn<8           | -1.913  | 0.202 |
| 546 | MGH-TH-1    | Skin     | Melanoma                | -                | -1.834  | 0.322 |
| 547 | SH-4        | Skin     | Melanoma                | 0<cn<8           | -1.831  | 0.239 |
| 548 | MM608       | Skin     | Melanoma                | -                | -1.767  | 0.043 |
| 549 | SK-MEL-30   | Skin     | Melanoma                | 0<cn<8           | -1.734  | 0.194 |
| 550 | IPC-298     | Skin     | Melanoma                | 0<cn<8           | -1.703  | 0.178 |
| 551 | COLO 857    | Skin     | Melanoma                | -                | -1.657  | 0.087 |
| 552 | MGH-SW-1    | Skin     | Melanoma                | -                | -1.628  | 0.062 |
| 553 | WM1158      | Skin     | Melanoma                | -                | -1.581  | 0.081 |
| 554 | WM793B      | Skin     | Melanoma                | -                | -1.501  | 0.311 |
| 555 | K4          | Skin     | Melanoma                | -                | -1.437  | 0.141 |
| 556 | M-14        | Skin     | Melanoma                | 0<cn<8           | -1.402  | 0.088 |
| 557 | MZ7-mel     | Skin     | Melanoma                | 0<cn<8           | -1.383  | 0.079 |
| 558 | WM164       | Skin     | Melanoma                | -                | -1.381  | 0.191 |
| 559 | A373-C6     | Skin     | Melanoma                | -                | -1.327  | 0.253 |
| 560 | A375.S2     | Skin     | Melanoma                | -                | -1.321  | 0.067 |
| 561 | IGR-1       | Skin     | Melanoma                | 0<cn<8           | -1.293  | 0.149 |
| 562 | A101D       | Skin     | Melanoma                | 0<cn<8           | -0.862  | 0.398 |
| 563 | Hs 940.T    | Skin     | Melanoma                | -                | -0.861  | 0.343 |
| 564 | WM278       | Skin     | Melanoma                | -                | -0.707  | 0.215 |
| 565 | MGH-MC-1    | Skin     | Melanoma                | -                | -0.641  | 0.368 |
| 566 | HT-144      | Skin     | Melanoma                | 0<cn<8           | -0.575  | 0.381 |
| 567 | MGH-BA-1    | Skin     | Melanoma                | -                | -0.372  | 0.226 |
| 568 | IST-MEL1    | Skin     | Melanoma                | -                | -0.360  | 0.412 |
| 569 | BU-ML       | Skin     | Melanoma                | -                | -0.342  | 0.358 |
| 570 | UIISO-MCC 1 | Skin     | Merkel cell carcinoma   | -                | -0.245  | 0.284 |
| 571 | COLO-849    | Skin     | Melanoma                | -                | -0.217  | 0.381 |
| 572 | COLO 853    | Skin     | Melanoma                | -                | -0.187  | 0.241 |
| 573 | IGR-37      | Skin     | Melanoma                | -                | -0.077  | 0.370 |
| 574 | Hs 939.T    | Skin     | Melanoma                | -                | 0.067   | 0.535 |
| 575 | 1205Lu      | Skin     | Melanoma                | -                | 0.175   | 0.430 |
| 576 | IGR-39      | Skin     | Melanoma                | -                | 0.230   | 0.449 |
| 577 | NAE         | Skin     | Melanoma                | -                | 0.239   | 0.413 |
| 578 | WM1552C     | Skin     | Melanoma                | -                | 0.305   | 0.430 |
| 579 | K19         | Skin     | Melanoma                | -                | 0.383   | 0.463 |
| 580 | CP50-MEL-B  | Skin     | Melanoma                | 0<cn<8           | 0.384   | 0.479 |

| #   | Cell_Line     | Organ   | Histology                   | MYCN Copy Number | LN_IC50 | EMax  |
|-----|---------------|---------|-----------------------------|------------------|---------|-------|
| 581 | UACC-62       | Skin    | Melanoma                    | 0<cn<8           | 0.506   | 0.475 |
| 582 | WM 266-4      | Skin    | Melanoma                    | -                | 0.515   | 0.476 |
| 583 | RVH-421       | Skin    | Melanoma                    | 0<cn<8           | 0.540   | 0.483 |
| 584 | LB373-MEL-D   | Skin    | Melanoma                    | 0<cn<8           | 0.578   | 0.491 |
| 585 | SK-MEL-3      | Skin    | Melanoma                    | -                | 0.579   | 0.481 |
| 586 | MEL-JUSO      | Skin    | Melanoma                    | 0<cn<8           | 0.662   | 0.502 |
| 587 | DJM-1         | Skin    | Malignant trichilemmal cyst | 0<cn<8           | 0.664   | 0.450 |
| 588 | COLO-829      | Skin    | Melanoma                    | 0<cn<8           | 0.678   | 0.530 |
| 589 | MM455         | Skin    | Melanoma                    | -                | 0.926   | 0.487 |
| 590 | MMAC-SF       | Skin    | Melanoma                    | 0<cn<8           | 0.931   | 0.509 |
| 591 | MGH-MCC-1     | Skin    | Merkel cell carcinoma       | -                | 1.029   | 0.527 |
| 592 | UACC903       | Skin    | Melanoma                    | -                | 1.080   | 0.443 |
| 593 | Hs 944.T      | Skin    | Melanoma                    | -                | 1.081   | 0.555 |
| 594 | HMVII         | Skin    | Melanoma                    | 0<cn<8           | 1.119   | 0.564 |
| 595 | SK-MEL-5      | Skin    | Melanoma                    | 0<cn<8           | 1.164   | 0.550 |
| 596 | COLO-818      | Skin    | Melanoma                    | -                | 1.224   | 0.612 |
| 597 | MCC13         | Skin    | Merkel cell carcinoma       | -                | 1.306   | 0.608 |
| 598 | SK-MEL-119    | Skin    | Melanoma                    | -                | 1.379   | 0.582 |
| 599 | UACC-257      | Skin    | Melanoma                    | 0<cn<8           | 1.502   | 0.575 |
| 600 | SK-MEL-131    | Skin    | Melanoma                    | -                | 1.540   | 0.618 |
| 601 | K2            | Skin    | Melanoma                    | -                | 1.566   | 0.580 |
| 602 | A-375         | Skin    | Melanoma                    | 0<cn<8           | 1.579   | 0.644 |
| 603 | GAK           | Skin    | Melanoma                    | 0<cn<8           | 1.805   | 0.647 |
| 604 | MZ2-MEL.      | Skin    | Melanoma                    | 0<cn<8           | 1.877   | 0.516 |
| 605 | CP66-MEL      | Skin    | Melanoma                    | 0<cn<8           | 1.878   | 0.623 |
| 606 | A2058         | Skin    | Melanoma                    | 0<cn<8           | 2.038   | 0.584 |
| 607 | WM239A        | Skin    | Melanoma                    | -                | 2.117   | 0.659 |
| 608 | WM902B        | Skin    | Melanoma                    | -                | 2.166   | 0.634 |
| 609 | MCC26         | Skin    | Merkel cell carcinoma       | -                | 2.417   | 0.691 |
| 610 | LB2518-MEL    | Skin    | Melanoma                    | 0<cn<8           | 2.598   | 0.735 |
| 611 | SK-MEL-37     | Skin    | Melanoma                    | -                | 2.852   | 0.798 |
| 612 | G-MEL         | Skin    | Melanoma                    | -                | 3.063   | 0.693 |
| 613 | K8            | Skin    | Melanoma                    | -                | 3.101   | 0.785 |
| 614 | MEWO          | Skin    | Melanoma                    | 0<cn<8           | 3.395   | 0.878 |
| 615 | SK-MEL-28     | Skin    | Melanoma                    | 0<cn<8           | 3.478   | 0.768 |
| 616 | WM-115        | Skin    | Melanoma                    | 0<cn<8           | 4.281   | 0.872 |
| 617 | COLO-800      | Skin    | Melanoma                    | -                | 4.496   | 0.948 |
| 618 | C32           | Skin    | Melanoma                    | 0<cn<8           | 5.438   | 1.139 |
| 619 | HGC-27        | Stomach | Adenocarcinoma              | 0<cn<8           | -2.178  | 0.050 |
| 620 | IM-95m        | Stomach | Adenocarcinoma              | -                | -1.777  | 0.126 |
| 621 | MKN74         | Stomach | Adenocarcinoma              | -                | -1.756  | 0.215 |
| 622 | IM-95         | Stomach | Adenocarcinoma              | -                | -1.614  | 0.210 |
| 623 | GT3TKB        | Stomach | Adenocarcinoma              | 0<cn<8           | -1.327  | 0.266 |
| 624 | AGS           | Stomach | Adenocarcinoma              | 0<cn<8           | -0.400  | 0.298 |
| 625 | MKN1          | Stomach | Squamous cell carcinoma     | 0<cn<8           | -0.250  | 0.325 |
| 626 | ECC12         | Stomach | Adenocarcinoma              | -                | -0.056  | 0.447 |
| 627 | MKN45         | Stomach | Adenocarcinoma              | -                | 0.086   | 0.401 |
| 628 | GCIY          | Stomach | Adenocarcinoma              | 0<cn<8           | 0.342   | 0.456 |
| 629 | MKN28         | Stomach | Adenocarcinoma              | 0<cn<8           | 0.463   | 0.473 |
| 630 | GTL-16        | Stomach | Carcinoma                   | -                | 0.541   | 0.451 |
| 631 | 23132/87      | Stomach | Adenocarcinoma              | 0<cn<8           | 1.021   | 0.484 |
| 632 | TMK-1         | Stomach | Adenocarcinoma              | -                | 1.067   | 0.577 |
| 633 | NUGC-3        | Stomach | Carcinoma                   | 0<cn<8           | 2.114   | 0.629 |
| 634 | AZ-521        | Stomach | Adenocarcinoma              | -                | 3.396   | 0.783 |
| 635 | NCI-N87       | Stomach | Adenocarcinoma              | 0<cn<8           | 3.638   | 0.842 |
| 636 | NUGC-4        | Stomach | Adenocarcinoma              | -                | 3.698   | 0.859 |
| 637 | NTERA-S-cl-D1 | Testes  | Germ cell tumor             | -                | -2.660  | 0.065 |
| 638 | CGTH-W-1      | Thyroid | Follicular carcinoma        | 0<cn<8           | -2.420  | 0.108 |
| 639 | KMH-2         | Thyroid | Anaplastic carcinoma        | -                | -1.796  | 0.125 |
| 640 | CAL-62        | Thyroid | Anaplastic carcinoma        | 0<cn<8           | -1.456  | 0.113 |
| 641 | TT2609-C02    | Thyroid | Follicular carcinoma        | -                | -1.380  | 0.297 |
| 642 | 8305C         | Thyroid | Anaplastic carcinoma        | 0<cn<8           | -1.334  | 0.159 |
| 643 | HTC-C3        | Thyroid | Carcinoma                   | 0<cn<8           | -0.827  | 0.396 |
| 644 | B-CPAP        | Thyroid | Anaplastic carcinoma        | 0<cn<8           | -0.729  | 0.211 |
| 645 | FTC-238       | Thyroid | Follicular carcinoma        | -                | -0.438  | 0.277 |

| #   | Cell_Line                  | Organ   | Histology               | MYCN Copy Number | LN_IC50 | EMax  |
|-----|----------------------------|---------|-------------------------|------------------|---------|-------|
| 646 | ML-1                       | Thyroid | Follicular carcinoma    | -                | -0.345  | 0.420 |
| 647 | 8505C                      | Thyroid | Anaplastic carcinoma    | -                | -0.274  | 0.314 |
| 648 | ASH-3                      | Thyroid | Anaplastic carcinoma    | -                | 0.071   | 0.364 |
| 649 | BHT-101                    | Thyroid | Anaplastic carcinoma    | 0<cn<8           | 0.471   | 0.469 |
| 650 | K5                         | Thyroid | Follicular carcinoma    | 0<cn<8           | 0.930   | 0.408 |
| 651 | S-117                      | Thyroid | Sarcoma                 | -                | 1.478   | 0.482 |
| 652 | RO82-W-1                   | Thyroid | Follicular carcinoma    | -                | 2.323   | 0.667 |
| 653 | FTC-133                    | Thyroid | Follicular carcinoma    | -                | 2.658   | 0.762 |
| 654 | TT                         | Thyroid | Medullary carcinoma     | 0<cn<8           | 4.383   | 0.919 |
| 655 | A388                       | Unknown | Carcinoma               | 0<cn<8           | -1.694  | 0.320 |
| 656 | Ishikawa                   | Uterus  | Adenocarcinoma          | -                | -1.636  | 0.090 |
| 657 | KLE                        | Uterus  | Adenocarcinoma          | 0<cn<8           | -1.093  | 0.309 |
| 658 | MFE-319                    | Uterus  | Adenocarcinoma          | -                | -0.796  | 0.284 |
| 659 | MES-SA                     | Uterus  | Sarcoma                 | 0<cn<8           | -0.754  | 0.282 |
| 660 | HEC-1                      | Uterus  | Adenocarcinoma          | -                | -0.369  | 0.277 |
| 661 | MES-SA/Dx-5                | Uterus  | Sarcoma                 | -                | -0.231  | 0.267 |
| 662 | SNG-M                      | Uterus  | Adenocarcinoma          | 0<cn<8           | 0.017   | 0.359 |
| 663 | JEG-3                      | Uterus  | Choriocarcinoma         | -                | 0.069   | 0.276 |
| 664 | ESS-1                      | Uterus  | Sarcoma                 | 0<cn<8           | 0.147   | 0.451 |
| 665 | RL95-2                     | Uterus  | Squamous cell carcinoma | 0<cn<8           | 0.484   | 0.431 |
| 666 | MFE-296                    | Uterus  | Adenocarcinoma          | 0<cn<8           | 0.614   | 0.494 |
| 667 | Ishikawa (Heraklio) 02 ER- | Uterus  | Adenocarcinoma          | -                | 0.703   | 0.497 |
| 668 | EFE-184                    | Uterus  | Carcinoma               | 0<cn<8           | 1.142   | 0.451 |
| 669 | MFE-280                    | Uterus  | Adenocarcinoma          | 0<cn<8           | 1.687   | 0.601 |
| 670 | AN3CA                      | Uterus  | Adenocarcinoma          | 0<cn<8           | 3.827   | 0.759 |
| 671 | EN                         | Uterus  | Carcinoma               | -                | 4.437   | 0.923 |
| 672 | SW954                      | Vulva   | Squamous cell carcinoma | 0<cn<8           | -0.359  | 0.452 |
| 673 | SW962                      | Vulva   | Squamous cell carcinoma | -                | 3.425   | 0.638 |

**Supplementary Table S2. GI<sub>50</sub> and E<sub>max</sub> for multiple neuroblastoma cell lines treated with active or inactive BET inhibitors.**

|                 | BE(2)-C               |                      | Kelly                 |                      | LAN-1                 |                      | NGP                   |                      | SH-SY5Y               |                      | SK-N-AS               |                      |
|-----------------|-----------------------|----------------------|-----------------------|----------------------|-----------------------|----------------------|-----------------------|----------------------|-----------------------|----------------------|-----------------------|----------------------|
|                 | GI <sub>50</sub> (μM) | E <sub>max</sub> (%) |
| <b>JQ1R</b>     | ND                    | 50                   | 15.50                 | 70                   | 14.50                 | 62                   | ND                    | 44                   | ND                    | 49                   | ND                    | 41                   |
| <b>JQ1S</b>     | 0.43                  | 87                   | 0.56                  | 96                   | 0.59                  | 93                   | ND                    | 36                   | 1.02                  | 77                   | 5.60                  | 63                   |
| <b>I-BET</b>    | 0.78                  | 82                   | 3.71                  | 68                   | 1.78                  | 75                   | ND                    | 32                   | 2.24                  | 67                   | ND                    | 41                   |
| <b>I-BET151</b> | 1.95                  | 83                   | 5.62                  | 72                   | 4.37                  | 75                   | ND                    | 45                   | 11.22                 | 51                   | ND                    | 24                   |

### Supplementary Table S3. Genes differentially expressed in JQ1 vs Vehicle treated neuroblastoma

| #  | JQ1_<br>vs_CT | GeneSymbol   | GeneTitle                                                            | SNR   | Pvalue  | FDR<br>(BH) | log2(Fold<br>Change) | CT_<br>Mean | CT_<br>Std | JQ1_<br>Mean | JQ1_<br>Std |
|----|---------------|--------------|----------------------------------------------------------------------|-------|---------|-------------|----------------------|-------------|------------|--------------|-------------|
| 1  | Down          | GTF3C6       | general transcription factor IIIC, polypeptide 6, alpha 35kDa        | -4.08 | 1.2E-07 | 6.3E-04     | -2.42                | 11.66       | 0.26       | 9.24         | 0.33        |
| 2  | Down          | HDAC9        | histone deacetylase 9                                                | -3.99 | 1.2E-07 | 6.3E-04     | -2.89                | 8.46        | 0.33       | 5.57         | 0.40        |
| 3  | Down          | UTRN         | utrophin                                                             | -3.90 | 1.1E-07 | 6.3E-04     | -1.95                | 8.16        | 0.27       | 6.21         | 0.23        |
| 4  | Down          | TBL1XR1      | transducin (beta)-like 1 X-linked receptor 1                         | -3.80 | 1.3E-07 | 6.3E-04     | -0.79                | 11.55       | 0.11       | 10.76        | 0.10        |
| 5  | Down          | ZMYND8       | zinc finger, MYND-type containing 8                                  | -3.29 | 1.2E-05 | 8.1E-03     | -1.64                | 10.46       | 0.16       | 8.83         | 0.34        |
| 6  | Down          | DLAT         | dihydropyrimidinase                                                  | -3.15 | 7.1E-07 | 2.4E-03     | -0.39                | 10.50       | 0.06       | 10.11        | 0.06        |
| 7  | Down          | BATF3        | basic leucine zipper transcription factor, ATF-like 3                | -3.07 | 3.3E-06 | 4.3E-03     | -1.17                | 7.00        | 0.15       | 5.83         | 0.23        |
| 8  | Down          | FAM101A      | family with sequence similarity 101, member A                        | -3.06 | 1.0E-06 | 2.8E-03     | -0.79                | 5.28        | 0.14       | 4.49         | 0.12        |
| 9  | Down          | C14orf1      | chromosome 14 open reading frame 1                                   | -3.03 | 1.1E-05 | 8.0E-03     | -0.89                | 9.57        | 0.19       | 8.68         | 0.10        |
| 10 | Down          | RAB7L1       | RAB7, member RAS oncogene family-like 1                              | -3.01 | 3.9E-05 | 1.3E-02     | -1.71                | 9.19        | 0.40       | 7.48         | 0.16        |
| 11 | Down          | LTV1         | LTV1 homolog (S. cerevisiae)                                         | -2.99 | 1.3E-06 | 2.8E-03     | -0.71                | 9.94        | 0.13       | 9.23         | 0.11        |
| 12 | Down          | C18orf55     | chromosome 18 open reading frame 55                                  | -2.93 | 4.0E-06 | 5.0E-03     | -0.80                | 10.26       | 0.11       | 9.46         | 0.16        |
| 13 | Down          | TH           | tyrosine hydroxylase                                                 | -2.87 | 2.5E-05 | 1.1E-02     | -1.69                | 9.31        | 0.19       | 7.61         | 0.40        |
| 14 | Down          | HOXC8        | homeobox C8                                                          | -2.84 | 3.2E-06 | 4.3E-03     | -2.81                | 8.98        | 0.43       | 6.17         | 0.56        |
| 15 | Down          | LOC100130776 | hypothetical LOC100130776                                            | -2.83 | 2.6E-05 | 1.1E-02     | -0.89                | 6.12        | 0.21       | 5.23         | 0.10        |
| 16 | Down          | SULF2        | sulfatase 2                                                          | -2.78 | 2.1E-05 | 1.1E-02     | -1.12                | 10.00       | 0.14       | 8.87         | 0.26        |
| 17 | Down          | PA2G4        | proliferation-associated 2G4, 38kDa                                  | -2.77 | 3.4E-05 | 1.2E-02     | -0.63                | 11.98       | 0.15       | 11.36        | 0.07        |
| 18 | Down          | RNF157       | ring finger protein 157                                              | -2.74 | 4.5E-05 | 1.4E-02     | -1.31                | 8.41        | 0.33       | 7.10         | 0.15        |
| 19 | Down          | ASB13        | ankyrin repeat and SOCS box-containing 13                            | -2.73 | 8.4E-06 | 7.8E-03     | -0.92                | 8.18        | 0.20       | 7.26         | 0.13        |
| 20 | Down          | RAC3         | ras-related C3 botulinum toxin substrate 3 (rho family, small GTP    | -2.71 | 1.0E-04 | 1.8E-02     | -0.80                | 8.67        | 0.08       | 7.87         | 0.22        |
| 21 | Down          | HEATR2       | HEAT repeat containing 2                                             | -2.65 | 3.6E-05 | 1.2E-02     | -0.84                | 12.03       | 0.21       | 11.19        | 0.11        |
| 22 | Down          | SLC5A6       | solute carrier family 5 (sodium-dependent vitamin transporter), m    | -2.53 | 1.3E-04 | 2.1E-02     | -0.90                | 11.02       | 0.10       | 10.12        | 0.26        |
| 23 | Down          | SORBS3       | sorbin and SH3 domain containing 3                                   | -2.48 | 8.6E-06 | 7.8E-03     | -1.25                | 6.84        | 0.23       | 5.59         | 0.28        |
| 24 | Down          | ITPRIPL2     | inositol 1,4,5-triphosphate receptor interacting protein-like 2      | -2.48 | 8.0E-06 | 7.8E-03     | -1.31                | 7.48        | 0.24       | 6.17         | 0.29        |
| 25 | Down          | PON2         | paraoxonase 2                                                        | -2.47 | 3.0E-05 | 1.1E-02     | -2.58                | 8.03        | 0.65       | 5.45         | 0.39        |
| 26 | Down          | RGS19        | regulator of G-protein signaling 19                                  | -2.47 | 2.5E-04 | 2.7E-02     | -0.84                | 9.32        | 0.08       | 8.47         | 0.26        |
| 27 | Down          | TBL2         | transducin (beta)-like 2                                             | -2.45 | 8.3E-05 | 1.8E-02     | -0.68                | 8.26        | 0.09       | 7.58         | 0.19        |
| 28 | Down          | SLC18A1      | solute carrier family 18 (vesicular monoamine), member 1             | -2.42 | 1.0E-05 | 7.8E-03     | -2.14                | 7.98        | 0.48       | 5.84         | 0.40        |
| 29 | Down          | OAF          | OAF homolog (Drosophila)                                             | -2.39 | 3.1E-04 | 3.1E-02     | -1.03                | 8.20        | 0.32       | 7.17         | 0.11        |
| 30 | Down          | C5orf43      | chromosome 5 open reading frame 43                                   | -2.39 | 2.2E-05 | 1.1E-02     | -0.55                | 10.00       | 0.09       | 9.45         | 0.14        |
| 31 | Down          | ADORA2B      | adenosine A2b receptor                                               | -2.36 | 1.7E-04 | 2.3E-02     | -2.33                | 7.17        | 0.70       | 4.84         | 0.29        |
| 32 | Down          | MAPK3        | mitogen-activated protein kinase 3                                   | -2.35 | 9.8E-05 | 1.8E-02     | -1.05                | 8.20        | 0.15       | 7.15         | 0.30        |
| 33 | Down          | TOMM40L      | translocase of outer mitochondrial membrane 40 homolog (yeast)       | -2.35 | 1.0E-05 | 7.8E-03     | -1.51                | 6.64        | 0.33       | 5.12         | 0.31        |
| 34 | Down          | LRP8         | low density lipoprotein receptor-related protein 8, apolipoprotein e | -2.32 | 2.6E-05 | 1.1E-02     | -0.71                | 8.54        | 0.18       | 7.84         | 0.12        |
| 35 | Down          | AEBP1        | AE binding protein 1                                                 | -2.31 | 5.4E-05 | 1.5E-02     | -0.77                | 8.45        | 0.21       | 7.68         | 0.12        |
| 36 | Down          | JAM2         | junctional adhesion molecule 2                                       | -2.29 | 3.0E-05 | 1.1E-02     | -0.78                | 8.10        | 0.14       | 7.32         | 0.20        |
| 37 | Down          | CC2D2A       | coiled-coil and C2 domain containing 2A                              | -2.29 | 2.1E-05 | 1.1E-02     | -1.65                | 8.37        | 0.31       | 6.72         | 0.41        |
| 38 | Down          | MTHFD1L      | methylenetetrahydrofolate dehydrogenase (NADP+ dependent) 1          | -2.29 | 3.3E-05 | 1.2E-02     | -1.56                | 10.31       | 0.27       | 8.75         | 0.41        |
| 39 | Down          | TFAP2B       | transcription factor AP-2 beta (activating enhancer binding protein  | -2.26 | 1.4E-05 | 9.0E-03     | -1.10                | 11.28       | 0.24       | 10.18        | 0.25        |
| 40 | Down          | PLIN3        | perilipin 3                                                          | -2.25 | 2.2E-05 | 1.1E-02     | -0.77                | 8.11        | 0.15       | 7.34         | 0.19        |
| 41 | Down          | ANK3         | ankyrin 3, node of Ranvier (ankyrin G)                               | -2.24 | 4.7E-05 | 1.4E-02     | -1.57                | 6.30        | 0.43       | 4.73         | 0.27        |
| 42 | Down          | RAB33A       | RAB33A, member RAS oncogene family                                   | -2.23 | 4.1E-04 | 3.6E-02     | -1.80                | 8.94        | 0.21       | 7.14         | 0.60        |
| 43 | Down          | ARHGAP23     | Rho GTPase activating protein 23                                     | -2.23 | 1.6E-05 | 9.8E-03     | -0.55                | 7.38        | 0.13       | 6.82         | 0.12        |
| 44 | Down          | MRPL15       | mitochondrial ribosomal protein L15                                  | -2.22 | 6.7E-05 | 1.7E-02     | -1.13                | 11.27       | 0.19       | 10.14        | 0.32        |
| 45 | Down          | AS3MT        | arsenic (+3 oxidation state) methyltransferase                       | -2.22 | 1.5E-04 | 2.2E-02     | -1.07                | 7.63        | 0.33       | 6.56         | 0.16        |
| 46 | Down          | UBL4A        | ubiquitin-like 4A                                                    | -2.22 | 4.3E-05 | 1.3E-02     | -0.89                | 8.54        | 0.24       | 7.65         | 0.16        |
| 47 | Down          | MRPL11       | mitochondrial ribosomal protein L11                                  | -2.19 | 2.0E-05 | 1.1E-02     | -0.78                | 10.84       | 0.19       | 10.06        | 0.17        |
| 48 | Down          | NOP16        | NOP16 nucleolar protein homolog (yeast)                              | -2.17 | 2.3E-05 | 1.1E-02     | -1.10                | 10.92       | 0.23       | 9.82         | 0.27        |
| 49 | Down          | CHRM1        | cholinergic receptor, muscarinic 1                                   | -2.17 | 9.7E-05 | 1.8E-02     | -0.64                | 6.79        | 0.11       | 6.15         | 0.19        |
| 50 | Down          | C1orf31      | chromosome 1 open reading frame 31                                   | -2.16 | 2.3E-05 | 1.1E-02     | -1.29                | 10.19       | 0.32       | 8.90         | 0.28        |
| 51 | Down          | MCHR1        | melanin-concentrating hormone receptor 1                             | -2.15 | 2.2E-04 | 2.6E-02     | -0.93                | 7.37        | 0.30       | 6.44         | 0.14        |
| 52 | Down          | C6orf192     | chromosome 6 open reading frame 192                                  | -2.14 | 1.6E-04 | 2.3E-02     | -1.93                | 8.73        | 0.60       | 6.79         | 0.30        |
| 53 | Down          | AIFM2        | apoptosis-inducing factor, mitochondrion-associated, 2               | -2.14 | 2.4E-05 | 1.1E-02     | -1.37                | 8.11        | 0.33       | 6.74         | 0.31        |
| 54 | Down          | C8orf38      | chromosome 8 open reading frame 38                                   | -2.13 | 9.4E-05 | 1.8E-02     | -0.85                | 8.96        | 0.15       | 8.11         | 0.25        |
| 55 | Down          | ZC3H7B       | zinc finger CCCH-type containing 7B                                  | -2.11 | 3.8E-05 | 1.2E-02     | -0.47                | 7.48        | 0.10       | 7.00         | 0.13        |
| 56 | Down          | CDK5RAP2     | CDK5 regulatory subunit associated protein 2                         | -2.11 | 6.4E-05 | 1.7E-02     | -0.71                | 8.31        | 0.20       | 7.61         | 0.13        |
| 57 | Down          | CDC43        | cell division cycle associated 3                                     | -2.10 | 8.3E-05 | 1.8E-02     | -0.85                | 8.42        | 0.25       | 7.57         | 0.15        |
| 58 | Down          | SEN3         | SUMO1/sentrin/SMT3 specific peptidase 3                              | -2.09 | 2.8E-05 | 1.1E-02     | -0.57                | 9.43        | 0.14       | 8.86         | 0.14        |
| 59 | Down          | BDH1         | 3-hydroxybutyrate dehydrogenase, type 1                              | -2.08 | 3.3E-05 | 1.2E-02     | -1.00                | 7.64        | 0.26       | 6.64         | 0.22        |
| 60 | Down          | ZNF573       | zinc finger protein 573                                              | -2.08 | 1.3E-04 | 2.1E-02     | -2.15                | 7.99        | 0.66       | 5.84         | 0.37        |
| 61 | Down          | L3MBTL2      | l(3)mbt-like 2 (Drosophila)                                          | -2.07 | 7.7E-05 | 1.8E-02     | -0.72                | 8.22        | 0.21       | 7.50         | 0.14        |
| 62 | Down          | LOC653566    | signal peptidase complex subunit 2 homolog pseudogen                 | -2.06 | 3.8E-04 | 3.4E-02     | -0.51                | 11.72       | 0.07       | 11.20        | 0.18        |
| 63 | Down          | BIRC5        | baculoviral IAP repeat-containing 5                                  | -2.05 | 1.6E-04 | 2.3E-02     | -0.60                | 11.11       | 0.10       | 10.51        | 0.19        |
| 64 | Down          | TXNDC15      | thioredoxin domain containing 15                                     | -2.05 | 1.0E-04 | 1.8E-02     | -1.33                | 9.23        | 0.25       | 7.90         | 0.40        |
| 65 | Down          | LRRC34       | leucine rich repeat containing 34                                    | -2.04 | 3.5E-05 | 1.2E-02     | -2.17                | 7.54        | 0.55       | 5.36         | 0.52        |

| #   | JQ1_vs_CT | GeneSymbol | GeneTitle                                                               | SNR   | Pvalue  | FDR (BH) | log2(Fold Change) | CT_Mean | CT_Std | JQ1_Mean | JQ1_Std |
|-----|-----------|------------|-------------------------------------------------------------------------|-------|---------|----------|-------------------|---------|--------|----------|---------|
| 66  | Down      | ZBTB2      | zinc finger and BTB domain containing 2                                 | -2.04 | 4.0E-05 | 1.3E-02  | -1.06             | 7.57    | 0.28   | 6.51     | 0.24    |
| 67  | Down      | FDXACB1    | ferredoxin-fold anticodon binding domain containing 1                   | -2.04 | 4.3E-05 | 1.3E-02  | -1.15             | 7.01    | 0.26   | 5.86     | 0.31    |
| 68  | Down      | TRMT1      | TRM1 tRNA methyltransferase 1 homolog (S. cerevisiae)                   | -2.02 | 1.6E-04 | 2.3E-02  | -0.98             | 7.63    | 0.17   | 6.66     | 0.31    |
| 69  | Down      | KLHDC5     | kelch domain containing 5                                               | -2.02 | 7.6E-05 | 1.8E-02  | -0.64             | 9.76    | 0.19   | 9.13     | 0.13    |
| 70  | Down      | HMP19      | HMP19 protein                                                           | -2.00 | 5.4E-04 | 4.4E-02  | -1.12             | 12.75   | 0.16   | 11.64    | 0.40    |
| 71  | Down      | IL12A      | interleukin 12A (natural killer cell stimulatory factor 1, cytotoxic ly | -2.00 | 1.2E-04 | 2.0E-02  | -0.80             | 5.50    | 0.25   | 4.70     | 0.15    |
| 72  | Down      | GRWD1      | glutamate-rich WD repeat containing 1                                   | -1.99 | 9.9E-05 | 1.8E-02  | -0.59             | 8.82    | 0.18   | 8.23     | 0.12    |
| 73  | Down      | MAGOHB     | mago-nashi homolog B (Drosophila)                                       | -1.98 | 7.3E-05 | 1.7E-02  | -1.45             | 9.96    | 0.31   | 8.51     | 0.42    |
| 74  | Down      | GINS1      | GINS complex subunit 1 (Psf1 homolog)                                   | -1.97 | 1.4E-04 | 2.2E-02  | -0.82             | 10.96   | 0.16   | 10.14    | 0.26    |
| 75  | Down      | FAM13A     | family with sequence similarity 13, member A                            | -1.97 | 6.0E-05 | 1.6E-02  | -0.99             | 7.37    | 0.28   | 6.38     | 0.23    |
| 76  | Down      | APBA2      | amyloid beta (A4) precursor protein-binding, family A, member 2         | -1.97 | 5.2E-05 | 1.5E-02  | -0.67             | 8.64    | 0.16   | 7.96     | 0.18    |
| 77  | Down      | IMPDH1     | IMP (inosine 5'-monophosphate) dehydrogenase 1                          | -1.96 | 8.1E-04 | 5.2E-02  | -0.68             | 11.63   | 0.26   | 10.95    | 0.09    |
| 78  | Down      | CAB39L     | calcium binding protein 39-like                                         | -1.94 | 6.5E-05 | 1.7E-02  | -1.91             | 8.07    | 0.54   | 6.15     | 0.45    |
| 79  | Down      | RNF112     | ring finger protein 112                                                 | -1.92 | 6.5E-04 | 4.7E-02  | -1.14             | 7.91    | 0.17   | 6.78     | 0.42    |
| 80  | Down      | BCAT1      | branched chain amino-acid transaminase 1, cytosolic                     | -1.92 | 1.5E-04 | 2.3E-02  | -1.12             | 11.99   | 0.36   | 10.87    | 0.22    |
| 81  | Down      | UROD       | uroporphyrinogen decarboxylase                                          | -1.92 | 1.4E-04 | 2.2E-02  | -1.07             | 11.20   | 0.34   | 10.12    | 0.22    |
| 82  | Down      | TMEM100    | transmembrane protein 100                                               | -1.92 | 1.0E-04 | 1.8E-02  | -0.83             | 7.72    | 0.25   | 6.90     | 0.18    |
| 83  | Down      | BRX1       | BRX1, biogenesis of ribosomes, homolog (S. cerevisiae)                  | -1.90 | 4.5E-04 | 3.8E-02  | -0.93             | 11.69   | 0.33   | 10.76    | 0.15    |
| 84  | Down      | ADAT2      | adenosine deaminase, tRNA-specific 2, TAD2 homolog (S. cerev            | -1.90 | 2.9E-04 | 2.9E-02  | -1.20             | 6.58    | 0.41   | 5.38     | 0.22    |
| 85  | Down      | ANKRD43    | ankyrin repeat domain 43                                                | -1.90 | 1.1E-04 | 1.9E-02  | -1.62             | 6.78    | 0.36   | 5.16     | 0.49    |
| 86  | Down      | FAM35A     | family with sequence similarity 35, member A                            | -1.90 | 6.4E-05 | 1.7E-02  | -0.72             | 10.82   | 0.19   | 10.10    | 0.20    |
| 87  | Down      | MRPL3      | mitochondrial ribosomal protein L3                                      | -1.87 | 7.8E-05 | 1.8E-02  | -0.75             | 12.07   | 0.22   | 11.32    | 0.19    |
| 88  | Down      | BCL2       | B-cell CLL/lymphoma 2                                                   | -1.86 | 7.6E-05 | 1.8E-02  | -0.79             | 6.74    | 0.22   | 5.95     | 0.20    |
| 89  | Down      | F12        | coagulation factor XII (Hageman factor)                                 | -1.86 | 1.9E-04 | 2.4E-02  | -1.36             | 8.91    | 0.45   | 7.55     | 0.28    |
| 90  | Down      | SLITRK5    | SLIT and NTRK-like family, member 5                                     | -1.85 | 2.9E-04 | 2.9E-02  | -2.09             | 7.89    | 0.72   | 5.80     | 0.41    |
| 91  | Down      | MAP2       | microtubule-associated protein 2                                        | -1.85 | 9.3E-05 | 1.8E-02  | -0.72             | 11.14   | 0.18   | 10.42    | 0.21    |
| 92  | Down      | HEBP2      | heme binding protein 2                                                  | -1.84 | 3.6E-04 | 3.4E-02  | -0.97             | 9.76    | 0.18   | 8.79     | 0.34    |
| 93  | Down      | SEMA6D     | sema domain, transmembrane domain (TM), and cytoplasmic do              | -1.84 | 8.6E-05 | 1.8E-02  | -1.25             | 6.20    | 0.36   | 4.95     | 0.32    |
| 94  | Down      | SERF1A     | small EDRK-rich factor 1A (telomeric)                                   | -1.84 | 8.6E-05 | 1.8E-02  | -0.46             | 10.39   | 0.12   | 9.93     | 0.13    |
| 95  | Down      | MCPH1      | microcephalin 1                                                         | -1.83 | 8.6E-05 | 1.8E-02  | -1.35             | 6.10    | 0.37   | 4.75     | 0.37    |
| 96  | Down      | CNRIP1     | cannabinoid receptor interacting protein 1                              | -1.82 | 3.4E-04 | 3.2E-02  | -1.10             | 10.99   | 0.22   | 9.90     | 0.39    |
| 97  | Down      | NME1       | non-metastatic cells 1                                                  | -1.81 | 1.7E-04 | 2.3E-02  | -0.67             | 13.06   | 0.22   | 12.39    | 0.15    |
| 98  | Down      | DPP7       | dipeptidyl-peptidase 7                                                  | -1.81 | 9.9E-05 | 1.8E-02  | -1.14             | 9.63    | 0.33   | 8.48     | 0.30    |
| 99  | Down      | RASL10B    | RAS-like, family 10, member B                                           | -1.80 | 6.7E-04 | 4.7E-02  | -1.09             | 8.99    | 0.42   | 7.90     | 0.19    |
| 100 | Down      | NOL12      | nucleolar protein 12                                                    | -1.79 | 1.6E-04 | 2.3E-02  | -0.56             | 9.55    | 0.18   | 8.99     | 0.13    |
| 101 | Down      | NUP205     | nucleoporin 205kDa                                                      | -1.79 | 1.0E-04 | 1.8E-02  | -0.68             | 11.51   | 0.20   | 10.84    | 0.18    |
| 102 | Down      | TRAF5      | TNF receptor-associated factor 5                                        | -1.79 | 1.0E-04 | 1.8E-02  | -1.26             | 7.80    | 0.35   | 6.54     | 0.36    |
| 103 | Down      | EML3       | echinoderm microtubule associated protein like 3                        | -1.79 | 1.0E-04 | 1.8E-02  | -0.90             | 8.34    | 0.25   | 7.44     | 0.26    |
| 104 | Down      | PEMT       | phosphatidylethanolamine N-methyltransferase                            | -1.78 | 2.3E-04 | 2.6E-02  | -1.21             | 9.16    | 0.27   | 7.95     | 0.41    |
| 105 | Down      | HAX1       | HCLS1 associated protein X-1                                            | -1.78 | 2.4E-04 | 2.7E-02  | -0.82             | 11.30   | 0.28   | 10.49    | 0.18    |
| 106 | Down      | BEND3      | BEN domain containing 3                                                 | -1.78 | 2.5E-04 | 2.7E-02  | -1.03             | 9.10    | 0.35   | 8.07     | 0.23    |
| 107 | Down      | EMILIN1    | elastin microfibril interfacier 1                                       | -1.77 | 4.1E-04 | 3.6E-02  | -1.85             | 9.58    | 0.67   | 7.74     | 0.37    |
| 108 | Down      | OBFC2B     | oligonucleotide/oligosaccharide-binding fold containing 2B              | -1.76 | 1.2E-04 | 2.1E-02  | -1.23             | 9.45    | 0.33   | 8.22     | 0.37    |
| 109 | Down      | TUB        | tubby homolog (mouse)                                                   | -1.76 | 1.6E-04 | 2.3E-02  | -1.07             | 10.19   | 0.27   | 9.12     | 0.34    |
| 110 | Down      | TCF7       | transcription factor 7 (T-cell specific, HMG-box)                       | -1.76 | 1.4E-04 | 2.2E-02  | -1.22             | 8.46    | 0.38   | 7.24     | 0.31    |
| 111 | Down      | ZFP36L2    | zinc finger protein 36, C3H type-like 2                                 | -1.75 | 1.4E-04 | 2.2E-02  | -0.80             | 9.83    | 0.21   | 9.03     | 0.25    |
| 112 | Down      | LSM3       | LSM3 homolog, U6 small nuclear RNA associated (S. cerevisiae)           | -1.74 | 3.8E-04 | 3.5E-02  | -0.48             | 11.47   | 0.17   | 10.99    | 0.10    |
| 113 | Down      | ALKBH8     | alkB, alkylation repair homolog 8 (E. coli)                             | -1.73 | 3.6E-04 | 3.4E-02  | -1.09             | 8.07    | 0.24   | 6.98     | 0.39    |
| 114 | Down      | E2F8       | E2F transcription factor 8                                              | -1.73 | 1.8E-04 | 2.4E-02  | -1.22             | 7.23    | 0.40   | 6.01     | 0.31    |
| 115 | Down      | PDGFRB     | platelet-derived growth factor receptor, beta polypeptide               | -1.72 | 1.7E-04 | 2.3E-02  | -0.67             | 7.36    | 0.22   | 6.69     | 0.17    |
| 116 | Down      | DEDD       | death effector domain containing                                        | -1.71 | 2.7E-04 | 2.8E-02  | -0.58             | 8.67    | 0.14   | 8.09     | 0.20    |
| 117 | Down      | PDE4B      | phosphodiesterase 4B, cAMP-specific                                     | -1.71 | 5.6E-04 | 4.4E-02  | -2.46             | 7.64    | 0.94   | 5.18     | 0.50    |
| 118 | Down      | ARMC6      | armadillo repeat containing 6                                           | -1.71 | 2.8E-04 | 2.8E-02  | -0.71             | 9.34    | 0.17   | 8.63     | 0.25    |
| 119 | Down      | SLC35F2    | solute carrier family 35, member F2                                     | -1.70 | 5.6E-04 | 4.4E-02  | -1.13             | 7.57    | 0.43   | 6.44     | 0.23    |
| 120 | Down      | AURKA      | aurora kinase A                                                         | -1.70 | 3.7E-04 | 3.4E-02  | -0.77             | 10.73   | 0.28   | 9.96     | 0.17    |
| 121 | Down      | BAI3       | brain-specific angiogenesis inhibitor 3                                 | -1.70 | 2.1E-04 | 2.6E-02  | -1.73             | 8.79    | 0.44   | 7.07     | 0.57    |
| 122 | Down      | DCLRE1A    | DNA cross-link repair 1A                                                | -1.69 | 1.7E-04 | 2.3E-02  | -1.62             | 8.00    | 0.45   | 6.38     | 0.50    |
| 123 | Down      | WDR35      | WD repeat domain 35                                                     | -1.69 | 2.0E-04 | 2.5E-02  | -0.79             | 8.73    | 0.21   | 7.94     | 0.26    |
| 124 | Down      | DKK1       | dickkopf homolog 1 (Xenopus laevis)                                     | -1.68 | 2.2E-04 | 2.6E-02  | -1.82             | 7.17    | 0.47   | 5.35     | 0.61    |
| 125 | Down      | PTPRU      | protein tyrosine phosphatase, receptor type, U                          | -1.68 | 2.0E-04 | 2.4E-02  | -0.60             | 7.67    | 0.16   | 7.07     | 0.19    |
| 126 | Down      | SLC3A2     | solute carrier family 3 (activators of dibasic and neutral amino aci    | -1.68 | 1.9E-04 | 2.4E-02  | -0.62             | 9.60    | 0.20   | 8.98     | 0.17    |
| 127 | Down      | KCNMA1     | potassium large conductance calcium-activated channel, subfam           | -1.68 | 2.3E-04 | 2.6E-02  | -1.58             | 8.54    | 0.41   | 6.95     | 0.53    |
| 128 | Down      | PP1L1      | peptidylprolyl isomerase (cyclophilin)-like 1                           | -1.67 | 1.8E-04 | 2.4E-02  | -0.91             | 10.62   | 0.28   | 9.72     | 0.26    |
| 129 | Down      | NPM3       | nucleophosmin/nucleoplamin 3                                            | -1.67 | 7.2E-04 | 4.8E-02  | -0.85             | 10.12   | 0.17   | 9.27     | 0.34    |
| 130 | Down      | KEAP1      | kelch-like ECH-associated protein 1                                     | -1.67 | 2.2E-04 | 2.6E-02  | -0.61             | 9.85    | 0.16   | 9.25     | 0.20    |
| 131 | Down      | RNASEH2B   | ribonuclease H2, subunit B                                              | -1.66 | 1.9E-04 | 2.4E-02  | -1.24             | 9.58    | 0.36   | 8.34     | 0.39    |
| 132 | Down      | APOBEC3C   | apolipoprotein B mRNA editing enzyme, catalytic polypeptide-like        | -1.65 | 5.4E-04 | 4.4E-02  | -0.84             | 7.85    | 0.32   | 7.00     | 0.19    |
| 133 | Down      | SYN2       | synapsin II                                                             | -1.65 | 2.5E-04 | 2.7E-02  | -0.38             | 7.48    | 0.13   | 7.10     | 0.10    |
| 134 | Down      | SENPA1     | SUMO1/sentrin specific peptidase 1                                      | -1.64 | 4.1E-04 | 3.6E-02  | -1.52             | 8.00    | 0.56   | 6.48     | 0.37    |
| 135 | Down      | SPAG5      | sperm associated antigen 5                                              | -1.64 | 2.4E-04 | 2.7E-02  | -0.52             | 9.89    | 0.14   | 9.37     | 0.17    |

| #   | JQ1_vs_CT | GeneSymbol | GeneTitle                                                           | SNR   | Pvalue  | FDR (BH) | log2(Fold Change) | CT_Mean | CT_Std | JQ1_Mean | JQ1_Std |
|-----|-----------|------------|---------------------------------------------------------------------|-------|---------|----------|-------------------|---------|--------|----------|---------|
| 136 | Down      | DCTPP1     | dCTP pyrophosphatase 1                                              | -1.64 | 2.2E-04 | 2.6E-02  | -0.82             | 11.35   | 0.26   | 10.53    | 0.24    |
| 137 | Down      | ATP5G1     | ATP synthase, H+ transporting, mitochondrial Fo complex, subun      | -1.63 | 6.0E-04 | 4.5E-02  | -0.80             | 11.44   | 0.31   | 10.64    | 0.18    |
| 138 | Down      | INO80E     | INO80 complex subunit E                                             | -1.62 | 2.5E-04 | 2.7E-02  | -0.40             | 8.13    | 0.11   | 7.73     | 0.13    |
| 139 | Down      | C1orf216   | chromosome 1 open reading frame 216                                 | -1.62 | 2.3E-04 | 2.6E-02  | -1.39             | 8.30    | 0.44   | 6.91     | 0.42    |
| 140 | Down      | TTC27      | tetratricopeptide repeat domain 27                                  | -1.62 | 2.3E-04 | 2.6E-02  | -1.23             | 9.61    | 0.39   | 8.39     | 0.37    |
| 141 | Down      | PRRT4      | proline-rich transmembrane protein 4                                | -1.61 | 3.6E-04 | 3.4E-02  | -1.66             | 9.62    | 0.60   | 7.96     | 0.43    |
| 142 | Down      | ADAM12     | ADAM metalloproteinase domain 12                                    | -1.61 | 2.9E-04 | 2.9E-02  | -1.71             | 7.16    | 0.59   | 5.46     | 0.47    |
| 143 | Down      | KCNG3      | potassium voltage-gated channel, subfamily G, member 3              | -1.61 | 3.2E-04 | 3.1E-02  | -0.63             | 5.27    | 0.17   | 4.65     | 0.22    |
| 144 | Down      | CCDC59     | coiled-coil domain containing 59                                    | -1.61 | 2.7E-04 | 2.8E-02  | -0.75             | 9.24    | 0.21   | 8.50     | 0.25    |
| 145 | Down      | PCDH1      | protocadherin 1                                                     | -1.61 | 2.4E-04 | 2.7E-02  | -1.18             | 8.96    | 0.37   | 7.78     | 0.36    |
| 146 | Down      | ANP32A     | acidic (leucine-rich) nuclear phosphoprotein 32 family, member A    | -1.60 | 2.7E-04 | 2.8E-02  | -0.67             | 11.70   | 0.19   | 11.03    | 0.22    |
| 147 | Down      | LZTS2      | leucine zipper, putative tumor suppressor 2                         | -1.60 | 2.7E-04 | 2.8E-02  | -0.50             | 9.03    | 0.16   | 8.54     | 0.15    |
| 148 | Down      | NUDC       | nuclear distribution gene C homolog (A. nidulans)                   | -1.59 | 4.2E-04 | 3.7E-02  | -0.60             | 10.65   | 0.16   | 10.05    | 0.22    |
| 149 | Down      | DENND1B    | DENN/MADD domain containing 1B                                      | -1.58 | 5.6E-04 | 4.4E-02  | -0.74             | 7.06    | 0.18   | 6.32     | 0.29    |
| 150 | Down      | DCAF4      | DDB1 and CUL4 associated factor 4                                   | -1.58 | 3.7E-04 | 3.4E-02  | -1.00             | 8.84    | 0.36   | 7.85     | 0.27    |
| 151 | Down      | ABHD14A    | abhydrolase domain containing 14A                                   | -1.58 | 6.1E-04 | 4.6E-02  | -0.77             | 7.45    | 0.19   | 6.68     | 0.30    |
| 152 | Down      | CAMK1D     | calcium/calmodulin-dependent protein kinase ID                      | -1.57 | 4.3E-04 | 3.7E-02  | -1.43             | 9.19    | 0.53   | 7.76     | 0.39    |
| 153 | Down      | TIMM13     | translocase of inner mitochondrial membrane 13 homolog (yeast)      | -1.56 | 4.5E-04 | 3.8E-02  | -0.58             | 11.54   | 0.22   | 10.95    | 0.16    |
| 154 | Down      | EXOSC8     | exosome component 8                                                 | -1.55 | 6.2E-04 | 4.6E-02  | -0.66             | 10.95   | 0.26   | 10.29    | 0.17    |
| 155 | Down      | PLD6       | phospholipase D family, member 6                                    | -1.55 | 6.9E-04 | 4.7E-02  | -1.70             | 9.01    | 0.42   | 7.31     | 0.68    |
| 156 | Down      | HSPC159    | galectin-related protein                                            | -1.55 | 5.2E-04 | 4.3E-02  | -1.15             | 7.58    | 0.44   | 6.43     | 0.30    |
| 157 | Down      | DAZAP1     | DAZ associated protein 1                                            | -1.54 | 3.3E-04 | 3.2E-02  | -0.79             | 11.31   | 0.25   | 10.52    | 0.26    |
| 158 | Down      | ZNF629     | zinc finger protein 629                                             | -1.54 | 5.0E-04 | 4.2E-02  | -0.46             | 8.52    | 0.17   | 8.07     | 0.12    |
| 159 | Down      | SERTAD4    | SERTA domain containing 4                                           | -1.54 | 3.4E-04 | 3.2E-02  | -1.42             | 7.59    | 0.45   | 6.17     | 0.47    |
| 160 | Down      | PSMD11     | proteasome (prosome, macropain) 26S subunit, non-ATPase, 11         | -1.54 | 3.5E-04 | 3.4E-02  | -0.41             | 11.58   | 0.13   | 11.17    | 0.14    |
| 161 | Down      | CUTA       | cutA divalent cation tolerance homolog (E. coli)                    | -1.53 | 6.7E-04 | 4.7E-02  | -0.86             | 11.55   | 0.22   | 10.69    | 0.34    |
| 162 | Down      | CAND2      | cullin-associated and neddylation-dissociated 2 (putative)          | -1.53 | 4.7E-04 | 4.0E-02  | -0.77             | 7.21    | 0.29   | 6.44     | 0.22    |
| 163 | Down      | FAR2       | fatty acyl CoA reductase 2                                          | -1.53 | 4.0E-04 | 3.6E-02  | -1.50             | 9.12    | 0.53   | 7.62     | 0.45    |
| 164 | Down      | ATF1       | activating transcription factor 1                                   | -1.52 | 3.7E-04 | 3.4E-02  | -0.83             | 8.69    | 0.28   | 7.86     | 0.26    |
| 165 | Down      | APH1A      | anterior pharynx defective 1 homolog A (C. elegans)                 | -1.52 | 3.7E-04 | 3.4E-02  | -0.36             | 9.97    | 0.12   | 9.62     | 0.12    |
| 166 | Down      | AMMECR1    | Alport syndrome, mental retardation, midface hypoplasia and ellip   | -1.51 | 5.2E-04 | 4.3E-02  | -0.47             | 9.55    | 0.18   | 9.08     | 0.13    |
| 167 | Down      | GPR19      | G protein-coupled receptor 19                                       | -1.51 | 4.0E-04 | 3.6E-02  | -1.79             | 8.71    | 0.62   | 6.92     | 0.56    |
| 168 | Down      | SEMA3E     | sema domain, immunoglobulin domain (Ig), short basic domain, s      | -1.50 | 5.9E-04 | 4.5E-02  | -1.06             | 5.70    | 0.41   | 4.64     | 0.30    |
| 169 | Down      | PTRH2      | peptidyl-tRNA hydrolase 2                                           | -1.48 | 4.5E-04 | 3.8E-02  | -0.44             | 10.06   | 0.15   | 9.62     | 0.15    |
| 170 | Down      | LDLR       | low density lipoprotein receptor                                    | -1.47 | 6.5E-04 | 4.7E-02  | -0.55             | 10.44   | 0.21   | 9.89     | 0.16    |
| 171 | Down      | ELOVL6     | ELOVL family member 6, elongation of long chain fatty acids (FE     | -1.47 | 6.5E-04 | 4.7E-02  | -0.81             | 9.27    | 0.23   | 8.46     | 0.32    |
| 172 | Down      | ITGB1BP1   | integrin beta 1 binding protein 1                                   | -1.47 | 6.2E-04 | 4.6E-02  | -0.48             | 11.21   | 0.19   | 10.72    | 0.14    |
| 173 | Down      | TMEM33     | transmembrane protein 33                                            | -1.47 | 6.4E-04 | 4.6E-02  | -0.59             | 9.90    | 0.23   | 9.31     | 0.17    |
| 174 | Down      | ABLIM1     | actin binding LIM protein 1                                         | -1.45 | 6.1E-04 | 4.6E-02  | -1.39             | 10.54   | 0.53   | 9.15     | 0.43    |
| 175 | Down      | SLC7A5     | solute carrier family 7 (cationic amino acid transporter, y+ system | -1.45 | 5.7E-04 | 4.4E-02  | -0.70             | 9.00    | 0.22   | 8.30     | 0.26    |
| 176 | Down      | CARM1      | coactivator-associated arginine methyltransferase 1                 | -1.45 | 6.1E-04 | 4.6E-02  | -0.72             | 9.96    | 0.22   | 9.23     | 0.27    |
| 177 | Down      | ATPIF1     | ATPase inhibitory factor 1                                          | -1.44 | 6.9E-04 | 4.7E-02  | -0.42             | 11.92   | 0.13   | 11.50    | 0.17    |
| 178 | Down      | RBMXL1     | RNA binding motif protein, X-linked-like 1                          | -1.44 | 5.5E-04 | 4.4E-02  | -0.95             | 7.95    | 0.31   | 7.00     | 0.34    |
| 179 | Down      | KCTD15     | potassium channel tetramerisation domain containing 15              | -1.44 | 5.6E-04 | 4.4E-02  | -2.23             | 8.29    | 0.73   | 6.06     | 0.81    |
| 180 | Down      | CCDC58     | coiled-coil domain containing 58                                    | -1.44 | 5.4E-04 | 4.4E-02  | -1.10             | 8.35    | 0.38   | 7.25     | 0.38    |
| 181 | Down      | CHD3       | chromodomain helicase DNA binding protein 3                         | -1.44 | 5.6E-04 | 4.4E-02  | -0.68             | 9.86    | 0.24   | 9.18     | 0.24    |
| 182 | Down      | FAM189B    | family with sequence similarity 189, member B                       | -1.43 | 5.9E-04 | 4.5E-02  | -0.70             | 9.60    | 0.25   | 8.91     | 0.24    |
| 183 | Down      | C1orf174   | chromosome 1 open reading frame 174                                 | -1.43 | 7.1E-04 | 4.8E-02  | -0.80             | 9.13    | 0.25   | 8.33     | 0.31    |
| 184 | Down      | IGF2AS     | insulin-like growth factor 2 antisense                              | -1.42 | 7.1E-04 | 4.8E-02  | -0.71             | 6.69    | 0.22   | 5.98     | 0.28    |
| 185 | Down      | IPO8       | importin 8                                                          | -1.42 | 8.1E-04 | 5.2E-02  | -0.68             | 7.76    | 0.20   | 7.08     | 0.27    |
| 186 | Down      | MGST2      | microsomal glutathione S-transferase 2                              | -1.42 | 7.6E-04 | 5.0E-02  | -1.22             | 9.24    | 0.48   | 8.02     | 0.37    |
| 187 | Down      | CUL4A      | cullin 4A                                                           | -1.41 | 6.5E-04 | 4.7E-02  | -0.94             | 9.46    | 0.35   | 8.52     | 0.32    |
| 188 | Down      | TSEN2      | tRNA splicing endonuclease 2 homolog (S. cerevisiae)                | -1.41 | 8.0E-04 | 5.2E-02  | -0.60             | 7.51    | 0.24   | 6.91     | 0.19    |
| 189 | Down      | CENPK      | centromere protein K                                                | -1.40 | 6.6E-04 | 4.7E-02  | -0.41             | 9.85    | 0.14   | 9.45     | 0.15    |
| 190 | Down      | ERF        | Ets2 repressor factor                                               | -1.40 | 6.8E-04 | 4.7E-02  | -0.61             | 7.27    | 0.22   | 6.66     | 0.21    |
| 191 | Down      | CNGB1      | cyclic nucleotide gated channel beta 1                              | -1.40 | 6.9E-04 | 4.7E-02  | -1.18             | 6.46    | 0.43   | 5.28     | 0.41    |
| 192 | Down      | PMP22      | peripheral myelin protein 22                                        | -1.37 | 7.9E-04 | 5.2E-02  | -1.51             | 9.32    | 0.55   | 7.81     | 0.55    |
| 193 | Down      | MRPS18C    | mitochondrial ribosomal protein S18C                                | -1.36 | 8.5E-04 | 5.4E-02  | -0.57             | 10.33   | 0.22   | 9.76     | 0.20    |
| 194 | Up        | ADI1       | acireductone dioxygenase 1                                          | 1.37  | 8.0E-04 | 5.2E-02  | 1.18              | 10.23   | 0.43   | 11.41    | 0.44    |
| 195 | Up        | OSTM1      | osteopetrosis associated transmembrane protein 1                    | 1.37  | 8.3E-04 | 5.3E-02  | 0.57              | 8.57    | 0.22   | 9.14     | 0.20    |
| 196 | Up        | PAPD5      | PAP associated domain containing 5                                  | 1.38  | 7.4E-04 | 5.0E-02  | 0.62              | 10.02   | 0.23   | 10.63    | 0.22    |
| 197 | Up        | IFNAR2     | interferon (alpha, beta and omega) receptor 2                       | 1.40  | 7.6E-04 | 5.0E-02  | 0.63              | 6.91    | 0.25   | 7.54     | 0.20    |
| 198 | Up        | HEXDC      | hexosaminidase (glycosyl hydrolase family 20, catalytic domain)     | 1.40  | 6.6E-04 | 4.7E-02  | 1.06              | 7.68    | 0.38   | 8.75     | 0.37    |
| 199 | Up        | FAM173A    | family with sequence similarity 173, member A                       | 1.41  | 6.8E-04 | 4.7E-02  | 0.85              | 8.89    | 0.32   | 9.74     | 0.28    |
| 200 | Up        | TUBB3      | tubulin, beta 3                                                     | 1.42  | 7.7E-04 | 5.0E-02  | 0.84              | 11.97   | 0.33   | 12.81    | 0.26    |
| 201 | Up        | RPGR       | retinitis pigmentosa GTPase regulator                               | 1.42  | 6.5E-04 | 4.7E-02  | 0.72              | 6.23    | 0.27   | 6.95     | 0.24    |
| 202 | Up        | EEF2       | eukaryotic translation elongation factor 2                          | 1.42  | 6.6E-04 | 4.7E-02  | 0.18              | 14.00   | 0.07   | 14.19    | 0.06    |
| 203 | Up        | DUSP14     | dual specificity phosphatase 14                                     | 1.43  | 6.3E-04 | 4.6E-02  | 0.76              | 8.26    | 0.25   | 9.02     | 0.29    |
| 204 | Up        | SLC30A9    | solute carrier family 30 (zinc transporter), member 9               | 1.43  | 6.5E-04 | 4.7E-02  | 0.41              | 10.09   | 0.16   | 10.50    | 0.13    |
| 205 | Up        | CCDC126    | coiled-coil domain containing 126                                   | 1.43  | 5.8E-04 | 4.5E-02  | 0.86              | 7.91    | 0.29   | 8.77     | 0.31    |

| #   | JQ1_vs_CT | GeneSymbol | GeneTitle                                                             | SNR  | Pvalue  | FDR (BH) | log2(Fold Change) | CT_Mean | CT_Std | JQ1_Mean | JQ1_Std |
|-----|-----------|------------|-----------------------------------------------------------------------|------|---------|----------|-------------------|---------|--------|----------|---------|
| 206 | Up        | CCNG2      | cyclin G2                                                             | 1.44 | 5.5E-04 | 4.4E-02  | 0.99              | 6.55    | 0.35   | 7.54     | 0.34    |
| 207 | Up        | ACTN4      | actinin, alpha 4                                                      | 1.44 | 6.1E-04 | 4.6E-02  | 0.28              | 9.36    | 0.10   | 9.64     | 0.09    |
| 208 | Up        | ZNF780B    | zinc finger protein 780B                                              | 1.46 | 5.5E-04 | 4.4E-02  | 0.14              | 4.45    | 0.04   | 4.59     | 0.05    |
| 209 | Up        | B3GNTL1    | UDP-GlcNAc:betaGal beta-1,3-N-acetylglucosaminyltransferase-          | 1.46 | 5.2E-04 | 4.3E-02  | 0.81              | 5.63    | 0.26   | 6.44     | 0.30    |
| 210 | Up        | SPTAN1     | spectrin, alpha, non-erythrocytic 1 (alpha-fodrin)                    | 1.47 | 5.8E-04 | 4.4E-02  | 1.22              | 7.80    | 0.37   | 9.03     | 0.46    |
| 211 | Up        | KIAA0247   | KIAA0247                                                              | 1.47 | 7.2E-04 | 4.8E-02  | 0.76              | 7.61    | 0.21   | 8.37     | 0.30    |
| 212 | Up        | MAPKBP1    | mitogen-activated protein kinase binding protein 1                    | 1.47 | 4.9E-04 | 4.1E-02  | 0.72              | 7.47    | 0.26   | 8.18     | 0.23    |
| 213 | Up        | ERRF1      | ERBB receptor feedback inhibitor 1                                    | 1.49 | 6.1E-04 | 4.6E-02  | 0.93              | 6.56    | 0.26   | 7.49     | 0.36    |
| 214 | Up        | JAK1       | Janus kinase 1                                                        | 1.51 | 6.2E-04 | 4.6E-02  | 1.10              | 8.82    | 0.43   | 9.92     | 0.30    |
| 215 | Up        | TPST1      | tyrosylprotein sulfotransferase 1                                     | 1.52 | 7.0E-04 | 4.8E-02  | 0.81              | 8.77    | 0.32   | 9.58     | 0.21    |
| 216 | Up        | C14orf129  | chromosome 14 open reading frame 129                                  | 1.55 | 6.3E-04 | 4.6E-02  | 0.60              | 9.27    | 0.15   | 9.88     | 0.24    |
| 217 | Up        | RABL2A     | RAB, member of RAS oncogene family-like 2A                            | 1.55 | 5.2E-04 | 4.3E-02  | 0.57              | 6.60    | 0.22   | 7.17     | 0.15    |
| 218 | Up        | BECN1      | beclin 1, autophagy related                                           | 1.55 | 5.7E-04 | 4.4E-02  | 0.33              | 11.48   | 0.08   | 11.81    | 0.13    |
| 219 | Up        | PTMS       | parathymosin                                                          | 1.56 | 4.1E-04 | 3.6E-02  | 0.50              | 8.64    | 0.14   | 9.14     | 0.18    |
| 220 | Up        | RFESD      | Rieske (Fe-S) domain containing                                       | 1.57 | 3.7E-04 | 3.4E-02  | 1.39              | 6.35    | 0.50   | 7.75     | 0.39    |
| 221 | Up        | CCNYL1     | cyclin Y-like 1                                                       | 1.57 | 3.1E-04 | 3.1E-02  | 1.36              | 7.20    | 0.46   | 8.56     | 0.41    |
| 222 | Up        | KLHL26     | kelch-like 26 (Drosophila)                                            | 1.57 | 3.4E-04 | 3.2E-02  | 0.29              | 5.77    | 0.08   | 6.05     | 0.10    |
| 223 | Up        | C1orf123   | chromosome 1 open reading frame 123                                   | 1.58 | 4.1E-04 | 3.6E-02  | 0.53              | 8.88    | 0.19   | 9.41     | 0.14    |
| 224 | Up        | VAMP8      | vesicle-associated membrane protein 8 (endobrevin)                    | 1.59 | 4.1E-04 | 3.6E-02  | 0.58              | 4.19    | 0.15   | 4.78     | 0.21    |
| 225 | Up        | BNIP3L     | BCL2/adenovirus E1B 19kDa interacting protein 3-like                  | 1.60 | 2.7E-04 | 2.8E-02  | 1.12              | 9.64    | 0.33   | 10.76    | 0.37    |
| 226 | Up        | CCS        | copper chaperone for superoxide dismutase                             | 1.60 | 3.1E-04 | 3.1E-02  | 0.80              | 8.16    | 0.28   | 8.96     | 0.22    |
| 227 | Up        | RPAIN      | RPA interacting protein                                               | 1.60 | 6.8E-04 | 4.7E-02  | 0.33              | 11.24   | 0.13   | 11.57    | 0.07    |
| 228 | Up        | PCBP2      | poly(rC) binding protein 2                                            | 1.61 | 2.4E-04 | 2.7E-02  | 0.27              | 13.14   | 0.09   | 13.40    | 0.08    |
| 229 | Up        | CTSS       | cathepsin S                                                           | 1.62 | 3.3E-04 | 3.2E-02  | 0.22              | 4.42    | 0.06   | 4.64     | 0.08    |
| 230 | Up        | ARSA       | arylsulfatase A                                                       | 1.63 | 2.3E-04 | 2.6E-02  | 0.70              | 6.13    | 0.23   | 6.83     | 0.20    |
| 231 | Up        | TM7SF2     | transmembrane 7 superfamily member 2                                  | 1.63 | 7.6E-04 | 5.0E-02  | 1.19              | 7.32    | 0.48   | 8.50     | 0.25    |
| 232 | Up        | HIST1H2BC  | histone cluster 1, H2bc                                               | 1.63 | 3.8E-04 | 3.4E-02  | 0.54              | 3.89    | 0.13   | 4.42     | 0.20    |
| 233 | Up        | GOLGA2     | golgin A2                                                             | 1.63 | 2.2E-04 | 2.6E-02  | 0.43              | 8.35    | 0.14   | 8.78     | 0.13    |
| 234 | Up        | ELL2       | elongation factor, RNA polymerase II, 2                               | 1.63 | 3.3E-04 | 3.2E-02  | 0.55              | 4.85    | 0.14   | 5.41     | 0.20    |
| 235 | Up        | ERLEC1     | endoplasmic reticulum lectin 1                                        | 1.64 | 6.8E-04 | 4.7E-02  | 0.44              | 8.98    | 0.17   | 9.41     | 0.09    |
| 236 | Up        | RPS6KA2    | ribosomal protein S6 kinase, 90kDa, polypeptide 2                     | 1.65 | 4.5E-04 | 3.8E-02  | 0.43              | 6.90    | 0.10   | 7.32     | 0.16    |
| 237 | Up        | DNAL4      | dynein, axonemal, light chain 4                                       | 1.66 | 4.9E-04 | 4.1E-02  | 0.35              | 7.64    | 0.08   | 7.99     | 0.13    |
| 238 | Up        | C17orf103  | chromosome 17 open reading frame 103                                  | 1.66 | 1.9E-04 | 2.4E-02  | 1.61              | 4.80    | 0.47   | 6.42     | 0.50    |
| 239 | Up        | PYGB       | phosphorylase, glycogen; brain                                        | 1.67 | 2.2E-04 | 2.6E-02  | 0.75              | 8.55    | 0.20   | 9.30     | 0.25    |
| 240 | Up        | HIST1H2BD  | histone cluster 1, H2bd                                               | 1.67 | 1.9E-04 | 2.4E-02  | 2.54              | 9.08    | 0.70   | 11.63    | 0.82    |
| 241 | Up        | HIST1H2BG  | histone cluster 1, H2bg                                               | 1.69 | 4.5E-04 | 3.8E-02  | 2.62              | 6.07    | 0.58   | 8.70     | 0.98    |
| 242 | Up        | C17orf91   | chromosome 17 open reading frame 91                                   | 1.70 | 1.6E-04 | 2.3E-02  | 0.84              | 6.51    | 0.26   | 7.36     | 0.24    |
| 243 | Up        | CLGN       | calmegin                                                              | 1.70 | 2.7E-04 | 2.8E-02  | 1.63              | 7.25    | 0.57   | 8.88     | 0.39    |
| 244 | Up        | LRP5L      | low density lipoprotein receptor-related protein 5-like               | 1.70 | 3.1E-04 | 3.1E-02  | 0.45              | 6.61    | 0.11   | 7.07     | 0.16    |
| 245 | Up        | CDK10      | cyclin-dependent kinase 10                                            | 1.72 | 1.5E-03 | 5.3E-02  | 0.57              | 8.59    | 0.25   | 9.16     | 0.09    |
| 246 | Up        | PPDPF      | pancreatic progenitor cell differentiation and proliferation factor h | 1.72 | 1.1E-03 | 5.1E-02  | 0.54              | 8.72    | 0.22   | 9.27     | 0.09    |
| 247 | Up        | STX1A      | syntaxin 1A (brain)                                                   | 1.72 | 2.4E-04 | 2.6E-02  | 0.60              | 7.19    | 0.14   | 7.79     | 0.20    |
| 248 | Up        | VASN       | vasorin                                                               | 1.73 | 1.8E-04 | 2.4E-02  | 0.88              | 6.55    | 0.28   | 7.42     | 0.22    |
| 249 | Up        | ATOX1      | ATX1 antioxidant protein 1 homolog (yeast)                            | 1.74 | 1.9E-04 | 2.4E-02  | 0.38              | 10.22   | 0.10   | 10.61    | 0.13    |
| 250 | Up        | HNRPLL     | heterogeneous nuclear ribonucleoprotein L-like                        | 1.74 | 1.4E-04 | 2.2E-02  | 0.40              | 10.78   | 0.11   | 11.18    | 0.12    |
| 251 | Up        | APAF1      | apoptotic peptidase activating factor 1                               | 1.74 | 1.8E-04 | 2.4E-02  | 0.32              | 5.10    | 0.10   | 5.41     | 0.08    |
| 252 | Up        | TBC1D2     | TBC1 domain family, member 2                                          | 1.74 | 1.4E-04 | 2.2E-02  | 0.42              | 5.83    | 0.13   | 6.25     | 0.11    |
| 253 | Up        | BAHCC1     | BAH domain and coiled-coil containing 1                               | 1.75 | 1.3E-04 | 2.1E-02  | 0.58              | 7.50    | 0.17   | 8.08     | 0.16    |
| 254 | Up        | UBL3       | ubiquitin-like 3                                                      | 1.75 | 8.3E-04 | 5.3E-02  | 0.66              | 7.99    | 0.11   | 8.65     | 0.26    |
| 255 | Up        | CPT2       | carnitine palmitoyltransferase 2                                      | 1.77 | 1.4E-04 | 2.2E-02  | 0.53              | 6.92    | 0.17   | 7.45     | 0.13    |
| 256 | Up        | ITPR1      | inositol 1,4,5-triphosphate receptor, type 1                          | 1.78 | 1.2E-04 | 2.0E-02  | 0.93              | 9.17    | 0.28   | 10.10    | 0.24    |
| 257 | Up        | CDKN2D     | cyclin-dependent kinase inhibitor 2D (p19, inhibits CDK4)             | 1.78 | 1.1E-04 | 1.9E-02  | 1.33              | 7.28    | 0.40   | 8.62     | 0.35    |
| 258 | Up        | SESN3      | sestrin 3                                                             | 1.80 | 7.7E-04 | 5.1E-02  | 1.10              | 5.55    | 0.43   | 6.65     | 0.18    |
| 259 | Up        | HIST3H2A   | histone cluster 3, H2a                                                | 1.80 | 1.8E-04 | 2.4E-02  | 1.16              | 8.11    | 0.26   | 9.27     | 0.38    |
| 260 | Up        | EFHA1      | EF-hand domain family, member A1                                      | 1.81 | 1.1E-04 | 1.8E-02  | 1.00              | 9.94    | 0.30   | 10.94    | 0.25    |
| 261 | Up        | CYB5R3     | cytochrome b5 reductase 3                                             | 1.82 | 8.9E-05 | 1.8E-02  | 0.41              | 10.41   | 0.11   | 10.82    | 0.12    |
| 262 | Up        | BRD2       | bromodomain containing 2                                              | 1.83 | 2.2E-04 | 2.6E-02  | 0.83              | 9.81    | 0.28   | 10.65    | 0.18    |
| 263 | Up        | HIST1H3D   | histone cluster 1, H3d                                                | 1.84 | 1.8E-04 | 2.4E-02  | 1.62              | 6.84    | 0.35   | 8.45     | 0.53    |
| 264 | Up        | DNM1L      | dynamin 1-like                                                        | 1.85 | 1.2E-04 | 2.1E-02  | 0.50              | 11.55   | 0.15   | 12.04    | 0.11    |
| 265 | Up        | HIST1H2BF  | histone cluster 1, H2bf                                               | 1.90 | 7.3E-05 | 1.7E-02  | 0.91              | 5.43    | 0.22   | 6.34     | 0.26    |
| 266 | Up        | PIM1       | pim-1 oncogene                                                        | 1.90 | 1.1E-04 | 1.9E-02  | 0.69              | 8.79    | 0.21   | 9.48     | 0.15    |
| 267 | Up        | RAB7B      | RAB7B, member RAS oncogene family                                     | 1.91 | 8.2E-05 | 1.8E-02  | 0.18              | 4.75    | 0.05   | 4.94     | 0.04    |
| 268 | Up        | HIST1H2BC  | histone cluster 1, H2bc                                               | 1.93 | 4.3E-04 | 3.7E-02  | 1.28              | 4.15    | 0.21   | 5.43     | 0.46    |
| 269 | Up        | PJA2       | praja ring finger 2                                                   | 1.94 | 7.0E-05 | 1.7E-02  | 0.60              | 9.88    | 0.14   | 10.48    | 0.17    |
| 270 | Up        | HEXIM1     | hexamethylene bis-acetamide inducible 1                               | 1.94 | 7.3E-04 | 4.9E-02  | 1.82              | 9.25    | 0.69   | 11.07    | 0.25    |
| 271 | Up        | SERTAD1    | SERTA domain containing 1                                             | 1.94 | 1.2E-03 | 5.5E-02  | 1.14              | 6.71    | 0.13   | 7.85     | 0.46    |
| 272 | Up        | BBS4       | Bardet-Biedl syndrome 4                                               | 1.95 | 1.7E-04 | 2.3E-02  | 0.72              | 8.28    | 0.14   | 9.00     | 0.23    |
| 273 | Up        | C5orf55    | chromosome 5 open reading frame 55                                    | 1.96 | 7.2E-05 | 1.7E-02  | 0.46              | 7.44    | 0.10   | 7.90     | 0.13    |
| 274 | Up        | MYH9       | myosin, heavy chain 9, non-muscle                                     | 1.97 | 9.3E-05 | 1.8E-02  | 0.42              | 9.89    | 0.09   | 10.31    | 0.12    |
| 275 | Up        | D2HGDH     | D-2-hydroxyglutarate dehydrogenase                                    | 1.98 | 6.7E-05 | 1.7E-02  | 0.46              | 7.39    | 0.10   | 7.86     | 0.13    |

| #   | JQ1_vs_CT | GeneSymbol | GeneTitle                                                            | SNR  | Pvalue  | FDR (BH) | log2(Fold Change) | CT_Mean | CT_Std | JQ1_Mean | JQ1_Std |
|-----|-----------|------------|----------------------------------------------------------------------|------|---------|----------|-------------------|---------|--------|----------|---------|
| 276 | Up        | PPP3CB     | protein phosphatase 3, catalytic subunit, beta isozyme               | 1.98 | 9.4E-05 | 1.8E-02  | 0.78              | 9.78    | 0.24   | 10.56    | 0.16    |
| 277 | Up        | KCTD21     | potassium channel tetramerisation domain containing 21               | 2.00 | 7.3E-05 | 1.7E-02  | 0.73              | 6.36    | 0.15   | 7.09     | 0.21    |
| 278 | Up        | LOC729991  | hypothetical protein LOC729991                                       | 2.00 | 6.1E-05 | 1.6E-02  | 0.96              | 7.16    | 0.21   | 8.12     | 0.27    |
| 279 | Up        | FAM164A    | family with sequence similarity 164, member A                        | 2.02 | 5.9E-05 | 1.6E-02  | 0.62              | 9.17    | 0.17   | 9.78     | 0.13    |
| 280 | Up        | ARL3       | ADP-ribosylation factor-like 3                                       | 2.02 | 2.9E-04 | 2.9E-02  | 0.46              | 10.58   | 0.16   | 11.05    | 0.07    |
| 281 | Up        | LOC728392  | hypothetical protein LOC728392                                       | 2.03 | 1.6E-03 | 5.4E-02  | 0.97              | 8.84    | 0.40   | 9.81     | 0.08    |
| 282 | Up        | DNAJC1     | DnaJ (Hsp40) homolog, subfamily C, member 1                          | 2.07 | 9.7E-05 | 1.8E-02  | 1.19              | 9.89    | 0.36   | 11.08    | 0.22    |
| 283 | Up        | SCARNA20   | small Cajal body-specific RNA 20                                     | 2.07 | 9.2E-05 | 1.8E-02  | 2.44              | 7.44    | 0.73   | 9.89     | 0.45    |
| 284 | Up        | PCDH17     | protocadherin 17                                                     | 2.07 | 5.6E-05 | 1.6E-02  | 1.11              | 8.26    | 0.22   | 9.37     | 0.31    |
| 285 | Up        | C17orf108  | chromosome 17 open reading frame 108                                 | 2.08 | 3.7E-05 | 1.2E-02  | 1.22              | 5.96    | 0.27   | 7.18     | 0.32    |
| 286 | Up        | C19orf63   | chromosome 19 open reading frame 63                                  | 2.09 | 1.6E-04 | 2.3E-02  | 0.55              | 11.68   | 0.09   | 12.23    | 0.17    |
| 287 | Up        | AP1G2      | adaptor-related protein complex 1, gamma 2 subunit                   | 2.10 | 1.6E-04 | 2.3E-02  | 1.01              | 6.43    | 0.17   | 7.44     | 0.32    |
| 288 | Up        | RPL12      | ribosomal protein L12                                                | 2.14 | 5.9E-05 | 1.6E-02  | 0.16              | 13.98   | 0.04   | 14.13    | 0.03    |
| 289 | Up        | FILIP1L    | filamin A interacting protein 1-like                                 | 2.18 | 3.1E-05 | 1.2E-02  | 1.68              | 5.00    | 0.33   | 6.68     | 0.44    |
| 290 | Up        | POLG       | polymerase (DNA directed), gamma                                     | 2.20 | 3.0E-04 | 3.0E-02  | 0.68              | 8.70    | 0.22   | 9.38     | 0.09    |
| 291 | Up        | HIST1H2AE  | histone cluster 1, H2ae                                              | 2.21 | 1.7E-04 | 2.3E-02  | 2.43              | 7.05    | 0.35   | 9.48     | 0.75    |
| 292 | Up        | ZNF480     | zinc finger protein 480                                              | 2.23 | 1.8E-05 | 1.1E-02  | 1.16              | 7.20    | 0.28   | 8.35     | 0.24    |
| 293 | Up        | RALGAPA1   | Ral GTPase activating protein, alpha subunit 1 (catalytic)           | 2.24 | 2.1E-05 | 1.1E-02  | 0.88              | 9.11    | 0.18   | 10.00    | 0.22    |
| 294 | Up        | DCXR       | dicarbonyl/L-xylulose reductase                                      | 2.25 | 3.0E-05 | 1.1E-02  | 1.69              | 10.50   | 0.44   | 12.19    | 0.31    |
| 295 | Up        | THAP8      | THAP domain containing 8                                             | 2.26 | 1.5E-05 | 9.3E-03  | 1.39              | 8.02    | 0.29   | 9.40     | 0.32    |
| 296 | Up        | HIST1H2AC  | histone cluster 1, H2ac                                              | 2.27 | 1.4E-05 | 9.0E-03  | 2.31              | 7.56    | 0.50   | 9.87     | 0.51    |
| 297 | Up        | TMEM8A     | transmembrane protein 8A                                             | 2.29 | 8.0E-04 | 5.2E-02  | 1.27              | 6.75    | 0.10   | 8.02     | 0.46    |
| 298 | Up        | GCH1       | GTP cyclohydrolase 1                                                 | 2.32 | 2.0E-04 | 2.5E-02  | 1.21              | 7.70    | 0.37   | 8.91     | 0.15    |
| 299 | Up        | PCMTD1     | protein-L-isoaspartate (D-aspartate) O-methyltransferase domain      | 2.35 | 2.9E-05 | 1.1E-02  | 0.46              | 7.64    | 0.12   | 8.11     | 0.08    |
| 300 | Up        | HIST2H2AA3 | histone cluster 2, H2aa3                                             | 2.43 | 2.1E-04 | 2.6E-02  | 2.37              | 10.01   | 0.26   | 12.37    | 0.71    |
| 301 | Up        | C1orf63    | chromosome 1 open reading frame 63                                   | 2.46 | 1.5E-04 | 2.2E-02  | 1.00              | 8.26    | 0.29   | 9.27     | 0.12    |
| 302 | Up        | SERPINI1   | serpin peptidase inhibitor, clade I (neuroserpin), member 1          | 2.50 | 2.5E-05 | 1.1E-02  | 1.49              | 5.01    | 0.22   | 6.50     | 0.37    |
| 303 | Up        | PAG1       | phosphoprotein associated with glycosphingolipid microdomains        | 2.52 | 9.1E-05 | 1.8E-02  | 1.66              | 8.18    | 0.46   | 9.84     | 0.20    |
| 304 | Up        | INPP4A     | inositol polyphosphate-4-phosphatase, type I, 107kDa                 | 2.64 | 5.6E-06 | 5.8E-03  | 0.71              | 9.08    | 0.15   | 9.79     | 0.12    |
| 305 | Up        | TMEFF2     | transmembrane protein with EGF-like and two follistatin-like domains | 2.65 | 1.9E-05 | 1.1E-02  | 1.38              | 7.68    | 0.33   | 9.06     | 0.19    |
| 306 | Up        | TUFT1      | tuftelin 1                                                           | 2.68 | 9.4E-06 | 7.8E-03  | 1.37              | 7.60    | 0.21   | 8.98     | 0.31    |
| 307 | Up        | OS9        | osteosarcoma amplified 9, endoplasmic reticulum lectin               | 2.75 | 1.1E-05 | 8.1E-03  | 0.54              | 8.31    | 0.07   | 8.85     | 0.12    |
| 308 | Up        | GCLC       | glutamate-cysteine ligase, catalytic subunit                         | 2.78 | 5.2E-06 | 5.8E-03  | 0.81              | 8.74    | 0.17   | 9.55     | 0.12    |
| 309 | Up        | HIST1H2BK  | histone cluster 1, H2bk                                              | 2.84 | 2.7E-06 | 4.1E-03  | 1.37              | 10.29   | 0.27   | 11.67    | 0.22    |
| 310 | Up        | HIST1H2AG  | histone cluster 1, H2ag                                              | 2.95 | 9.7E-06 | 7.8E-03  | 2.48              | 6.61    | 0.31   | 9.09     | 0.53    |
| 311 | Up        | C19orf30   | chromosome 19 open reading frame 30                                  | 2.97 | 4.8E-06 | 5.7E-03  | 2.55              | 4.81    | 0.34   | 7.36     | 0.52    |
| 312 | Up        | SDCBP      | syndecan binding protein (syntenin)                                  | 3.01 | 1.1E-06 | 2.8E-03  | 1.04              | 9.81    | 0.18   | 10.85    | 0.17    |
| 313 | Up        | TAX1BP3    | Tax1 (human T-cell leukemia virus type I) binding protein 3          | 3.85 | 2.1E-06 | 3.5E-03  | 1.54              | 9.32    | 0.14   | 10.85    | 0.26    |
| 314 | Up        | GDF11      | growth differentiation factor 11                                     | 4.00 | 1.7E-06 | 3.1E-03  | 1.13              | 8.34    | 0.10   | 9.47     | 0.18    |
| 315 | Up        | HIST2H2BC  | histone cluster 2, H2bc                                              | 4.20 | 2.0E-07 | 8.1E-04  | 1.69              | 5.33    | 0.16   | 7.02     | 0.24    |
| 316 | Up        | NEU1       | sialidase 1 (lysosomal sialidase)                                    | 4.32 | 1.5E-06 | 3.1E-03  | 0.88              | 8.93    | 0.07   | 9.80     | 0.14    |

Supplementary Table S4. MYCN Amplification Upregulation Signature in Primary Neuroblastoma Tumors

| #  | ProbeID      | GeneSymbol | SNR Score | P-Value | FDR(BH) | Q-Value | log2 (Fold Change) | MYCN NonAmpl Mean | MYCN NonAmpl Stdev | MYCN Ampl Mean | MYCN Ampl Stdev |
|----|--------------|------------|-----------|---------|---------|---------|--------------------|-------------------|--------------------|----------------|-----------------|
| 1  | 213943_at    | TWIST1     | 0.614     | 0.001   | 0.019   | 0.008   | 3.255              | 6.761             | 2.369              | 10.016         | 2.930           |
| 2  | 213418_at    | HSPA6      | 0.924     | 0.000   | 0.011   | 0.006   | 3.250              | 3.980             | 1.555              | 7.229          | 1.962           |
| 3  | 209757_s_at  | MYCN       | 1.031     | 0.000   | 0.011   | 0.006   | 3.052              | 9.270             | 1.372              | 12.322         | 1.587           |
| 4  | 205143_at    | NCAN       | 0.534     | 0.003   | 0.023   | 0.010   | 2.928              | 3.645             | 2.535              | 6.572          | 2.946           |
| 5  | 233562_at    | LOC84856   | 0.705     | 0.000   | 0.011   | 0.006   | 2.927              | 3.532             | 1.842              | 6.458          | 2.308           |
| 6  | 207028_at    | MYCNOS     | 1.041     | 0.000   | 0.011   | 0.006   | 2.830              | 2.762             | 0.869              | 5.592          | 1.851           |
| 7  | 226884_at    | LRRN1      | 0.773     | 0.000   | 0.011   | 0.006   | 2.685              | 3.560             | 1.301              | 6.245          | 2.174           |
| 8  | 201397_at    | PHGDH      | 0.922     | 0.000   | 0.011   | 0.006   | 2.532              | 5.066             | 1.228              | 7.598          | 1.519           |
| 9  | 209988_s_at  | ASCL1      | 0.445     | 0.014   | 0.049   | 0.020   | 2.504              | 5.450             | 2.709              | 7.955          | 2.923           |
| 10 | 229139_at    | JPH1       | 0.815     | 0.000   | 0.011   | 0.006   | 2.449              | 3.172             | 1.164              | 5.622          | 1.842           |
| 11 | 229400_at    | HOXD10     | 0.501     | 0.003   | 0.023   | 0.010   | 2.343              | 3.344             | 1.434              | 5.687          | 3.240           |
| 12 | 202934_at    | HK2        | 0.753     | 0.000   | 0.011   | 0.006   | 2.315              | 5.244             | 1.476              | 7.559          | 1.596           |
| 13 | 204014_at    | DUSP4      | 0.535     | 0.004   | 0.025   | 0.010   | 2.277              | 5.458             | 2.164              | 7.735          | 2.093           |
| 14 | 205394_at    | CHEK1      | 0.649     | 0.000   | 0.014   | 0.006   | 2.231              | 3.851             | 1.466              | 6.082          | 1.971           |
| 15 | 204603_at    | EXO1       | 0.643     | 0.001   | 0.016   | 0.007   | 2.179              | 4.454             | 1.569              | 6.632          | 1.818           |
| 16 | 203196_at    | ABCC4      | 1.068     | 0.000   | 0.011   | 0.006   | 2.153              | 4.771             | 0.953              | 6.925          | 1.062           |
| 17 | 218984_at    | PUS7       | 0.900     | 0.000   | 0.011   | 0.006   | 2.101              | 6.793             | 0.835              | 8.894          | 1.500           |
| 18 | 231882_at    | FLJ39632   | 0.574     | 0.001   | 0.019   | 0.008   | 2.091              | 4.363             | 1.494              | 6.454          | 2.145           |
| 19 | 239413_at    | CEP152     | 0.556     | 0.003   | 0.022   | 0.009   | 2.080              | 4.371             | 1.878              | 6.451          | 1.860           |
| 20 | 224428_s_at  | CDC47      | 0.475     | 0.011   | 0.044   | 0.018   | 2.057              | 5.978             | 2.241              | 8.035          | 2.093           |
| 21 | 207828_s_at  | CENPF      | 0.496     | 0.010   | 0.040   | 0.016   | 1.996              | 7.104             | 2.195              | 9.099          | 1.828           |
| 22 | 225834_at    | FAM72A     | 0.471     | 0.011   | 0.043   | 0.017   | 1.971              | 5.770             | 2.078              | 7.741          | 2.102           |
| 23 | 219867_at    | CHODL      | 0.521     | 0.003   | 0.023   | 0.010   | 1.936              | 3.619             | 1.666              | 5.555          | 2.051           |
| 24 | 241224_x_at  | DSCR8      | 0.524     | 0.003   | 0.023   | 0.010   | 1.925              | 2.524             | 0.946              | 4.448          | 2.725           |
| 25 | 204126_s_at  | CDC45      | 0.515     | 0.004   | 0.025   | 0.011   | 1.895              | 5.040             | 1.926              | 6.935          | 1.752           |
| 26 | 223700_at    | MND1       | 0.550     | 0.002   | 0.021   | 0.009   | 1.870              | 4.346             | 1.496              | 6.216          | 1.904           |
| 27 | 225687_at    | FAM83D     | 0.494     | 0.008   | 0.036   | 0.015   | 1.861              | 5.296             | 1.962              | 7.157          | 1.802           |
| 28 | 213920_at    | CUX2       | 0.451     | 0.011   | 0.043   | 0.018   | 1.844              | 6.555             | 2.029              | 8.399          | 2.057           |
| 29 | 205046_at    | CENPE      | 0.510     | 0.006   | 0.030   | 0.013   | 1.834              | 4.042             | 1.778              | 5.876          | 1.821           |
| 30 | 202236_s_at  | SLC16A1    | 0.793     | 0.000   | 0.014   | 0.006   | 1.816              | 5.529             | 1.016              | 7.345          | 1.274           |
| 31 | 204836_at    | GLDC       | 0.791     | 0.000   | 0.011   | 0.006   | 1.814              | 2.559             | 0.343              | 4.373          | 1.949           |
| 32 | 228821_at    | ST6GAL2    | 0.556     | 0.001   | 0.016   | 0.007   | 1.814              | 3.066             | 1.069              | 4.879          | 2.192           |
| 33 | 210448_s_at  | P2RX5      | 0.671     | 0.000   | 0.014   | 0.006   | 1.811              | 5.081             | 1.357              | 6.892          | 1.342           |
| 34 | 218662_s_at  | NCAPG      | 0.519     | 0.007   | 0.033   | 0.014   | 1.807              | 7.394             | 1.900              | 9.202          | 1.580           |
| 35 | 227243_s_at  | EBF3       | 0.441     | 0.011   | 0.043   | 0.018   | 1.807              | 3.781             | 1.625              | 5.588          | 2.475           |
| 36 | 209642_at    | BUB1       | 0.481     | 0.009   | 0.039   | 0.016   | 1.800              | 4.651             | 1.921              | 6.451          | 1.823           |
| 37 | 211696_x_at  | HBB        | 0.488     | 0.009   | 0.039   | 0.016   | 1.800              | 12.053            | 2.400              | 13.853         | 1.292           |
| 38 | 209295_at    | TNFRSF10B  | 0.473     | 0.006   | 0.031   | 0.013   | 1.782              | 6.033             | 1.559              | 7.815          | 2.209           |
| 39 | 223500_at    | CPLX1      | 0.576     | 0.002   | 0.020   | 0.008   | 1.736              | 6.246             | 1.916              | 7.982          | 1.099           |
| 40 | 232034_at    | LOC203274  | 0.591     | 0.002   | 0.020   | 0.009   | 1.728              | 6.995             | 1.413              | 8.723          | 1.510           |
| 41 | 218726_at    | HJURP      | 0.448     | 0.013   | 0.048   | 0.020   | 1.721              | 4.791             | 1.974              | 6.512          | 1.871           |
| 42 | 210347_s_at  | BCL11A     | 0.486     | 0.008   | 0.035   | 0.014   | 1.718              | 6.591             | 1.992              | 8.308          | 1.543           |
| 43 | 225081_s_at  | CDC47L     | 0.452     | 0.011   | 0.042   | 0.017   | 1.716              | 5.148             | 1.675              | 6.864          | 2.123           |
| 44 | 213707_s_at  | DLX5       | 0.432     | 0.013   | 0.047   | 0.019   | 1.713              | 2.551             | 1.106              | 4.265          | 2.863           |
| 45 | 214710_s_at  | CCNB1      | 0.515     | 0.006   | 0.030   | 0.013   | 1.712              | 6.925             | 1.949              | 8.637          | 1.378           |
| 46 | 200790_at    | ODC1       | 0.660     | 0.001   | 0.016   | 0.007   | 1.699              | 10.671            | 0.783              | 12.369         | 1.792           |
| 47 | 223062_s_at  | PSAT1      | 0.621     | 0.001   | 0.019   | 0.008   | 1.698              | 7.833             | 1.292              | 9.531          | 1.441           |
| 48 | 212282_at    | TMEM97     | 1.036     | 0.000   | 0.011   | 0.006   | 1.680              | 9.155             | 0.962              | 10.835         | 0.659           |
| 49 | 206376_at    | SLC6A15    | 0.692     | 0.000   | 0.011   | 0.006   | 1.663              | 6.781             | 1.717              | 8.444          | 0.688           |
| 50 | 225612_s_at  | B3GNT5     | 0.491     | 0.005   | 0.028   | 0.011   | 1.654              | 4.918             | 1.511              | 6.572          | 1.856           |
| 51 | 227037_at    | PLD6       | 0.948     | 0.000   | 0.011   | 0.006   | 1.648              | 6.932             | 0.924              | 8.580          | 0.815           |
| 52 | 231930_at    | ELMOD1     | 0.804     | 0.000   | 0.011   | 0.006   | 1.647              | 2.313             | 0.267              | 3.959          | 1.781           |
| 53 | 235205_at    | LOC346887  | 0.431     | 0.011   | 0.043   | 0.017   | 1.636              | 6.096             | 1.599              | 7.732          | 2.195           |
| 54 | 1562309_s_at | PHF21B     | 0.455     | 0.013   | 0.047   | 0.019   | 1.629              | 6.750             | 1.645              | 8.379          | 1.932           |
| 55 | 242560_at    | FANCD2     | 0.450     | 0.014   | 0.050   | 0.020   | 1.628              | 5.438             | 1.933              | 7.065          | 1.682           |
| 56 | 202973_x_at  | FAM13A     | 0.488     | 0.007   | 0.032   | 0.013   | 1.601              | 6.752             | 1.922              | 8.353          | 1.356           |
| 57 | 221580_s_at  | TAF1D      | 1.025     | 0.000   | 0.011   | 0.006   | 1.589              | 9.058             | 0.650              | 10.647         | 0.901           |
| 58 | 220443_s_at  | VAX2       | 0.951     | 0.000   | 0.011   | 0.006   | 1.586              | 2.347             | 0.282              | 3.932          | 1.385           |
| 59 | 216262_s_at  | TGIF2      | 0.861     | 0.000   | 0.011   | 0.006   | 1.568              | 4.151             | 0.787              | 5.719          | 1.034           |
| 60 | 204798_at    | MYB        | 0.499     | 0.004   | 0.026   | 0.011   | 1.565              | 3.338             | 1.268              | 4.903          | 1.870           |
| 61 | 231772_x_at  | CENPH      | 0.542     | 0.003   | 0.023   | 0.010   | 1.561              | 4.843             | 1.353              | 6.405          | 1.526           |
| 62 | 224724_at    | SULF2      | 0.661     | 0.000   | 0.011   | 0.006   | 1.557              | 7.024             | 1.522              | 8.581          | 0.832           |
| 63 | 224468_s_at  | C19orf48   | 0.797     | 0.000   | 0.011   | 0.006   | 1.533              | 6.526             | 0.811              | 8.059          | 1.113           |
| 64 | 206510_at    | SIX2       | 0.560     | 0.001   | 0.019   | 0.008   | 1.525              | 2.854             | 0.583              | 4.378          | 2.140           |
| 65 | 206023_at    | NMU        | 0.405     | 0.014   | 0.049   | 0.020   | 1.503              | 2.997             | 1.368              | 4.500          | 2.344           |
| 66 | 217986_s_at  | BAZ1A      | 0.550     | 0.002   | 0.020   | 0.009   | 1.497              | 5.995             | 1.321              | 7.492          | 1.400           |
| 67 | 210473_s_at  | GPR125     | 0.662     | 0.000   | 0.014   | 0.006   | 1.493              | 7.665             | 0.992              | 9.158          | 1.263           |
| 68 | 201761_at    | MTHFD2     | 0.978     | 0.000   | 0.011   | 0.006   | 1.489              | 9.931             | 0.749              | 11.419         | 0.773           |
| 69 | 202534_x_at  | DHFR       | 0.586     | 0.002   | 0.021   | 0.009   | 1.486              | 8.778             | 1.288              | 10.264         | 1.249           |
| 70 | 213793_s_at  | HOMER1     | 0.746     | 0.000   | 0.011   | 0.006   | 1.467              | 7.775             | 1.338              | 9.242          | 0.630           |
| 71 | 207035_at    | SLC30A3    | 0.588     | 0.002   | 0.020   | 0.009   | 1.467              | 3.715             | 1.088              | 5.182          | 1.405           |
| 72 | 207404_s_at  | HTR1E      | 0.416     | 0.011   | 0.043   | 0.018   | 1.458              | 2.641             | 1.174              | 4.099          | 2.333           |
| 73 | 242957_at    | VWCE       | 0.689     | 0.000   | 0.014   | 0.006   | 1.444              | 3.518             | 0.976              | 4.962          | 1.120           |
| 74 | 224610_at    | SNHG1      | 0.500     | 0.005   | 0.028   | 0.011   | 1.434              | 9.540             | 1.158              | 10.975         | 1.712           |
| 75 | 201774_s_at  | NCAPD2     | 0.513     | 0.005   | 0.027   | 0.011   | 1.428              | 5.074             | 1.276              | 6.502          | 1.509           |
| 76 | 229276_at    | IGSF9      | 0.554     | 0.003   | 0.022   | 0.009   | 1.426              | 3.907             | 1.181              | 5.334          | 1.396           |
| 77 | 1558139_at   | FLJ39632   | 0.492     | 0.004   | 0.025   | 0.011   | 1.421              | 5.348             | 1.111              | 6.768          | 1.774           |
| 78 | 212414_s_at  | GLYR1      | 0.607     | 0.001   | 0.016   | 0.007   | 1.416              | 7.194             | 1.303              | 8.610          | 1.031           |
| 79 | 202465_at    | PCOLCE     | 0.578     | 0.001   | 0.019   | 0.008   | 1.413              | 9.030             | 0.951              | 10.443         | 1.493           |

| #   | ProbeID      | GeneSymbol   | SNR Score | P-Value | FDR(BH) | Q-Value | log2 (Fold Change) | MYCN NonAmpl Mean | MYCN NonAmpl Stdev | MYCN Ampl Mean | MYCN Ampl Stdev |
|-----|--------------|--------------|-----------|---------|---------|---------|--------------------|-------------------|--------------------|----------------|-----------------|
| 80  | 223570_at    | MCM10        | 0.495     | 0.006   | 0.031   | 0.013   | 1.412              | 5.072             | 1.451              | 6.485          | 1.403           |
| 81  | 207144_s_at  | CITED1       | 0.557     | 0.002   | 0.020   | 0.008   | 1.399              | 4.464             | 1.079              | 5.863          | 1.432           |
| 82  | 224870_at    | KIAA0114     | 0.696     | 0.001   | 0.018   | 0.008   | 1.398              | 8.171             | 0.969              | 9.569          | 1.041           |
| 83  | 223506_at    | ZC3H8        | 0.733     | 0.000   | 0.011   | 0.006   | 1.396              | 5.738             | 0.860              | 7.135          | 1.046           |
| 84  | 212018_s_at  | RSL1D1       | 0.755     | 0.000   | 0.011   | 0.006   | 1.396              | 8.668             | 1.077              | 10.064         | 0.773           |
| 85  | 201195_s_at  | SLC7A5       | 0.763     | 0.000   | 0.011   | 0.006   | 1.378              | 7.139             | 0.749              | 8.517          | 1.057           |
| 86  | 237005_at    | LOC442075    | 0.501     | 0.004   | 0.026   | 0.011   | 1.376              | 5.801             | 1.235              | 7.176          | 1.509           |
| 87  | 209975_at    | CYP2E1       | 0.457     | 0.008   | 0.037   | 0.015   | 1.369              | 2.838             | 1.220              | 4.207          | 1.774           |
| 88  | 239106_at    | CA5BP        | 0.457     | 0.010   | 0.040   | 0.017   | 1.367              | 5.936             | 1.419              | 7.302          | 1.570           |
| 89  | 225541_at    | RPL22L1      | 0.618     | 0.001   | 0.018   | 0.008   | 1.366              | 9.140             | 0.958              | 10.506         | 1.252           |
| 90  | 223361_at    | C6orf115     | 0.615     | 0.001   | 0.018   | 0.008   | 1.356              | 6.831             | 1.408              | 8.187          | 0.797           |
| 91  | 227228_s_at  | CCDC88C      | 0.536     | 0.003   | 0.023   | 0.010   | 1.354              | 2.595             | 0.915              | 3.948          | 1.612           |
| 92  | 226465_at    | CREB3L4      | 0.585     | 0.002   | 0.020   | 0.008   | 1.353              | 5.632             | 0.930              | 6.985          | 1.385           |
| 93  | 226661_at    | CDC42        | 0.438     | 0.013   | 0.048   | 0.020   | 1.352              | 4.884             | 1.535              | 6.236          | 1.556           |
| 94  | 217809_at    | BZW2         | 0.732     | 0.000   | 0.011   | 0.006   | 1.352              | 10.405            | 0.879              | 11.757         | 0.969           |
| 95  | 200903_s_at  | AHCY         | 0.790     | 0.000   | 0.011   | 0.006   | 1.351              | 8.632             | 0.710              | 9.982          | 1.000           |
| 96  | 219105_x_at  | ORC6L        | 0.523     | 0.004   | 0.025   | 0.010   | 1.350              | 7.342             | 1.308              | 8.692          | 1.273           |
| 97  | 217988_at    | CCNB1P1      | 0.667     | 0.000   | 0.014   | 0.006   | 1.344              | 8.954             | 0.947              | 10.298         | 1.069           |
| 98  | 213713_s_at  | GLB1L2       | 0.523     | 0.003   | 0.023   | 0.010   | 1.339              | 4.836             | 1.190              | 6.175          | 1.369           |
| 99  | 235572_at    | SPC24        | 0.452     | 0.013   | 0.047   | 0.019   | 1.322              | 4.908             | 1.411              | 6.230          | 1.517           |
| 100 | 209760_at    | KIAA0922     | 0.776     | 0.000   | 0.011   | 0.006   | 1.310              | 6.015             | 0.877              | 7.325          | 0.812           |
| 101 | 201797_s_at  | VARS         | 0.967     | 0.000   | 0.014   | 0.006   | 1.307              | 6.963             | 0.680              | 8.270          | 0.672           |
| 102 | 203625_x_at  | SKP2         | 0.502     | 0.006   | 0.030   | 0.013   | 1.292              | 7.936             | 1.157              | 9.228          | 1.415           |
| 103 | 242828_at    | FIGN         | 0.443     | 0.010   | 0.040   | 0.016   | 1.289              | 6.965             | 1.357              | 8.255          | 1.555           |
| 104 | 219511_s_at  | SNCAIP       | 0.476     | 0.006   | 0.031   | 0.013   | 1.287              | 4.544             | 1.104              | 5.831          | 1.598           |
| 105 | 228956_at    | UGT8         | 0.483     | 0.006   | 0.030   | 0.012   | 1.285              | 2.569             | 0.735              | 3.853          | 1.922           |
| 106 | 201013_s_at  | PAICS        | 0.854     | 0.000   | 0.011   | 0.006   | 1.278              | 9.562             | 0.738              | 10.841         | 0.758           |
| 107 | 1565786_x_at | FLJ45482     | 0.551     | 0.003   | 0.023   | 0.009   | 1.272              | 4.536             | 1.078              | 5.808          | 1.231           |
| 108 | 208117_s_at  | LAS1L        | 0.775     | 0.000   | 0.011   | 0.006   | 1.266              | 6.531             | 0.823              | 7.796          | 0.809           |
| 109 | 205604_at    | HOXD9        | 0.438     | 0.012   | 0.046   | 0.019   | 1.265              | 5.016             | 1.332              | 6.282          | 1.588           |
| 110 | 213338_at    | TMEM158      | 0.410     | 0.011   | 0.043   | 0.018   | 1.261              | 3.026             | 1.054              | 4.287          | 2.024           |
| 111 | 233499_at    | LRRC7        | 0.500     | 0.004   | 0.026   | 0.011   | 1.259              | 2.633             | 0.661              | 3.892          | 1.857           |
| 112 | 214096_s_at  | SHMT2        | 0.734     | 0.000   | 0.011   | 0.006   | 1.256              | 9.492             | 0.828              | 10.748         | 0.883           |
| 113 | 1553972_a_at | CBS          | 0.578     | 0.001   | 0.019   | 0.008   | 1.249              | 7.171             | 1.106              | 8.420          | 1.055           |
| 114 | 219365_s_at  | CAMKV        | 0.472     | 0.007   | 0.034   | 0.014   | 1.249              | 5.484             | 1.330              | 6.733          | 1.318           |
| 115 | 237737_at    | LOC100289026 | 0.460     | 0.007   | 0.033   | 0.014   | 1.246              | 2.822             | 0.873              | 4.068          | 1.837           |
| 116 | 209434_s_at  | PPAT         | 0.820     | 0.000   | 0.011   | 0.006   | 1.243              | 6.389             | 0.666              | 7.632          | 0.851           |
| 117 | 205768_s_at  | SLC27A2      | 0.452     | 0.008   | 0.035   | 0.014   | 1.242              | 3.643             | 1.252              | 4.885          | 1.496           |
| 118 | 225520_at    | MTHFD1L      | 1.035     | 0.000   | 0.011   | 0.006   | 1.235              | 7.532             | 0.579              | 8.767          | 0.615           |
| 119 | 235580_at    | ZNF141       | 0.508     | 0.005   | 0.029   | 0.012   | 1.232              | 5.258             | 1.100              | 6.490          | 1.325           |
| 120 | 208758_at    | ATIC         | 0.957     | 0.000   | 0.011   | 0.006   | 1.229              | 8.592             | 0.584              | 9.822          | 0.701           |
| 121 | 225398_at    | RPUSD4       | 0.865     | 0.000   | 0.011   | 0.006   | 1.225              | 8.094             | 0.630              | 9.319          | 0.786           |
| 122 | 201746_at    | TP53         | 0.598     | 0.001   | 0.019   | 0.008   | 1.219              | 3.553             | 0.915              | 4.772          | 1.124           |
| 123 | 204977_at    | DDX10        | 0.821     | 0.000   | 0.011   | 0.006   | 1.209              | 7.119             | 0.705              | 8.328          | 0.769           |
| 124 | 210227_at    | DLGAP2       | 0.499     | 0.005   | 0.028   | 0.012   | 1.204              | 5.942             | 1.402              | 7.146          | 1.012           |
| 125 | 209644_x_at  | CDKN2A       | 0.426     | 0.013   | 0.047   | 0.020   | 1.197              | 5.275             | 1.106              | 6.472          | 1.705           |
| 126 | 208361_s_at  | POLR3D       | 0.827     | 0.000   | 0.011   | 0.006   | 1.193              | 5.458             | 0.705              | 6.652          | 0.739           |
| 127 | 228503_at    | RPS8KA6      | 0.615     | 0.001   | 0.018   | 0.008   | 1.183              | 6.190             | 0.805              | 7.373          | 1.118           |
| 128 | 229332_at    | HPDL         | 0.564     | 0.001   | 0.019   | 0.008   | 1.179              | 2.449             | 0.770              | 3.628          | 1.322           |
| 129 | 203022_at    | RNASEH2A     | 0.477     | 0.010   | 0.041   | 0.017   | 1.179              | 8.000             | 1.276              | 9.178          | 1.196           |
| 130 | 204170_s_at  | CKS2         | 0.448     | 0.013   | 0.047   | 0.019   | 1.179              | 8.841             | 1.472              | 10.020         | 1.158           |
| 131 | 204947_at    | E2F1         | 0.544     | 0.002   | 0.020   | 0.009   | 1.178              | 6.297             | 1.197              | 7.475          | 0.968           |
| 132 | 201391_at    | TRAP1        | 1.003     | 0.000   | 0.011   | 0.006   | 1.168              | 8.961             | 0.511              | 10.129         | 0.653           |
| 133 | 213913_s_at  | TBC1D30      | 0.472     | 0.013   | 0.048   | 0.020   | 1.166              | 6.979             | 1.353              | 8.145          | 1.118           |
| 134 | 214045_at    | LIAS         | 0.595     | 0.001   | 0.016   | 0.007   | 1.163              | 2.873             | 0.652              | 4.035          | 1.303           |
| 135 | 203422_at    | POLD1        | 0.497     | 0.009   | 0.039   | 0.016   | 1.162              | 6.089             | 1.242              | 7.251          | 1.097           |
| 136 | 229655_at    | FAM19A5      | 0.573     | 0.001   | 0.018   | 0.008   | 1.162              | 6.486             | 1.028              | 7.648          | 1.000           |
| 137 | 204319_s_at  | RGS10        | 0.482     | 0.006   | 0.030   | 0.012   | 1.161              | 8.172             | 1.467              | 9.333          | 0.941           |
| 138 | 205522_at    | HOXD4        | 0.434     | 0.010   | 0.040   | 0.016   | 1.161              | 6.874             | 1.371              | 8.035          | 1.306           |
| 139 | 203693_s_at  | E2F3         | 0.553     | 0.003   | 0.023   | 0.010   | 1.159              | 7.039             | 1.131              | 8.198          | 0.963           |
| 140 | 219122_s_at  | THG1L        | 0.667     | 0.000   | 0.014   | 0.006   | 1.156              | 4.977             | 0.651              | 6.132          | 1.080           |
| 141 | 223157_at    | C4orf14      | 0.890     | 0.000   | 0.011   | 0.006   | 1.153              | 7.987             | 0.569              | 9.140          | 0.727           |
| 142 | 206074_s_at  | HMG1A1       | 0.821     | 0.000   | 0.011   | 0.006   | 1.150              | 8.954             | 0.667              | 10.104         | 0.733           |
| 143 | 1558290_a_at | PVT1         | 0.589     | 0.002   | 0.020   | 0.008   | 1.146              | 6.241             | 1.077              | 7.387          | 0.868           |

**Supplementary Table S5. Differential Expression of the MYCN Probes in JQ1 vs Vehicle Treated Neuroblastoma Cell Lines**

| # | ProbeID       | GeneSymbol | SNR Score | P-Value | FDR(BH) | Q-Value | log2 (Fold Change) | Veh Mean | Veh Stdev | JQ1 Mean | JQ1 Stdev |
|---|---------------|------------|-----------|---------|---------|---------|--------------------|----------|-----------|----------|-----------|
| 1 | 11719868_a_at | MYCN       | -1.9200   | 0.0022  | 0.0981  | 0.0761  | 0.7690             | 7.8005   | 0.1817    | 7.0315   | 0.2188    |
| 2 | 11750948_a_at | MYCN       | -1.3858   | 0.0022  | 0.0981  | 0.0761  | 0.8998             | 12.6017  | 0.3386    | 11.7018  | 0.3107    |
| 3 | 11719870_s_at | MYCN       | -0.9684   | 0.0118  | 0.2380  | 0.1814  | 0.3355             | 13.7185  | 0.1752    | 13.3830  | 0.1713    |
| 4 | 11719869_a_at | MYCN       | -0.3207   | 0.3041  | 0.7907  | 0.6008  | 0.1855             | 13.5448  | 0.2614    | 13.3593  | 0.3171    |

**Supplementary Table S6. GSEA Results for the Consensus JQ1 Downregulation Signature**

| #  | GeneSet Name                                                     | Source        | Size | NES    | P-Value | FDR   | Functional Cluster           |
|----|------------------------------------------------------------------|---------------|------|--------|---------|-------|------------------------------|
| 1  | WEI_MYCN_TARGETS_WITH_E_BOX                                      | MSigDB v03    | 741  | -1.567 | 0.000   | 0.001 | A: MYC                       |
| 2  | JANOUEIX_LEROSEY_MYCN_AMPL_UP                                    | GEO: GSE12460 | 152  | -1.495 | 0.002   | 0.010 | A: MYC                       |
| 3  | V\$MYCMAX_01                                                     | MSigDB v03    | 185  | -1.411 | 0.003   | 0.152 | A: MYC                       |
| 4  | SCHUHMACHER_MYC_TARGETS_UP                                       | MSigDB v03    | 67   | -1.392 | 0.055   | 0.189 | A: MYC                       |
| 5  | BILD_MYC_ONCOGENIC_SIGNATURE                                     | MSigDB v03    | 182  | -1.360 | 0.008   | 0.249 | A: MYC                       |
| 6  | CACGTG_V\$MYC_Q2                                                 | MSigDB v03    | 716  | -1.271 | 0.000   | 0.036 | A: MYC                       |
| 7  | V\$NMYC_01                                                       | MSigDB v03    | 196  | -1.271 | 0.045   | 0.249 | A: MYC                       |
| 8  | BENPORATH_MYC_MAX_TARGETS                                        | MSigDB v03    | 755  | -1.155 | 0.043   | 0.249 | A: MYC                       |
| 9  | DANG_BOUND_BY_MYC                                                | MSigDB v03    | 1025 | -1.153 | 0.023   | 0.237 | A: MYC                       |
| 10 | WONG_MITOCHONDRIA_GENE_MODULE                                    | MSigDB v03    | 207  | -1.456 | 0.000   | 0.083 | B: Metabolism                |
| 11 | MOOTHA_MITOCHONDRIA                                              | MSigDB v03    | 431  | -1.398 | 0.000   | 0.181 | B: Metabolism                |
| 12 | REACTOME_METABOLISM_OF_RNA                                       | MSigDB v03    | 93   | -1.396 | 0.015   | 0.184 | B: Metabolism                |
| 13 | REACTOME_METABOLISM_OF_PROTEINS                                  | MSigDB v03    | 213  | -1.369 | 0.006   | 0.235 | B: Metabolism                |
| 14 | REACTOME_METABOLISM_OF_AMINO_ACIDS                               | MSigDB v03    | 161  | -1.359 | 0.014   | 0.250 | B: Metabolism                |
| 15 | KEGG_PYRIMIDINE_METABOLISM                                       | MSigDB v03    | 95   | -1.341 | 0.026   | 0.246 | B: Metabolism                |
| 16 | KEGG_PURINE_METABOLISM                                           | MSigDB v03    | 154  | -1.328 | 0.023   | 0.233 | B: Metabolism                |
| 17 | REACTOME_PEPTIDE_CHAIN_ELONGATION                                | MSigDB v03    | 84   | -1.501 | 0.001   | 0.045 | C: Transcription/Translation |
| 18 | REACTOME_GTP_HYDROLYSIS_AND_JOINING_OF_THE_60S_RIBOSOMAL_SUBUNIT | MSigDB v03    | 105  | -1.479 | 0.015   | 0.058 | C: Transcription/Translation |
| 19 | REACTOME_VIRAL_MRNA_TRANSLATION                                  | MSigDB v03    | 84   | -1.477 | 0.001   | 0.057 | C: Transcription/Translation |
| 20 | REACTOME_TRANSLATION                                             | MSigDB v03    | 119  | -1.475 | 0.012   | 0.060 | C: Transcription/Translation |
| 21 | REACTOME_REGULATION_OF_BETA_CELL_DEVELOPMENT                     | MSigDB v03    | 110  | -1.466 | 0.008   | 0.073 | C: Transcription/Translation |
| 22 | REACTOME_REGULATION_OF_GENE_EXPRESSION_IN_BETA_CELLS             | MSigDB v03    | 98   | -1.454 | 0.016   | 0.081 | C: Transcription/Translation |
| 23 | REACTOME_FORMATION_OF_A_POOL_OF_FREE_40S_SUBUNITS                | MSigDB v03    | 94   | -1.450 | 0.025   | 0.086 | C: Transcription/Translation |
| 24 | REACTOME_GENE_EXPRESSION                                         | MSigDB v03    | 413  | -1.438 | 0.000   | 0.104 | C: Transcription/Translation |
| 25 | REACTOME_SYNTHESIS_OF_DNA                                        | MSigDB v03    | 83   | -1.402 | 0.033   | 0.174 | C: Transcription/Translation |
| 26 | REACTOME_HOST_INTERACTIONS_OF_HIV_FACTORS                        | MSigDB v03    | 117  | -1.341 | 0.038   | 0.228 | C: Transcription/Translation |
| 27 | PUJANA_CHEK2_PCC_NETWORK                                         | MSigDB v03    | 737  | -1.555 | 0.000   | 0.002 | D: Cell Cycle                |
| 28 | REACTOME_MITOTIC_M_M_G1_PHASES                                   | MSigDB v03    | 150  | -1.446 | 0.001   | 0.093 | D: Cell Cycle                |
| 29 | REACTOME_CELL_CYCLE_CHECKPOINTS                                  | MSigDB v03    | 104  | -1.417 | 0.018   | 0.143 | D: Cell Cycle                |
| 30 | REACTOME_G1_S_TRANSITION                                         | MSigDB v03    | 96   | -1.413 | 0.026   | 0.148 | D: Cell Cycle                |
| 31 | REACTOME_CELL_CYCLE_MITOTIC                                      | MSigDB v03    | 298  | -1.410 | 0.000   | 0.153 | D: Cell Cycle                |
| 32 | REACTOME_S_PHASE                                                 | MSigDB v03    | 97   | -1.393 | 0.022   | 0.191 | D: Cell Cycle                |
| 33 | REACTOME_MITOTIC_PROMETAPHASE                                    | MSigDB v03    | 91   | -1.373 | 0.019   | 0.230 | D: Cell Cycle                |
| 34 | REACTOME_ELONGATION_AND_PROCESSING_OF_CAPPED_TRANSCRIPTS         | MSigDB v03    | 124  | -1.351 | 0.026   | 0.247 | D: Cell Cycle                |
| 35 | PUJANA_BRCA2_PCC_NETWORK                                         | MSigDB v03    | 407  | -1.536 | 0.000   | 0.010 | E: DNA Repair                |
| 36 | PUJANA_XPRSS_INT_NETWORK                                         | MSigDB v03    | 163  | -1.501 | 0.000   | 0.042 | E: DNA Repair                |
| 37 | PUJANA_BRCA_CENTERED_NETWORK                                     | MSigDB v03    | 92   | -1.454 | 0.012   | 0.082 | E: DNA Repair                |
| 38 | V\$E2F_Q6_01                                                     | MSigDB v03    | 161  | -1.518 | 0.001   | 0.024 | F: E2F                       |
| 39 | V\$E2F_Q3                                                        | MSigDB v03    | 167  | -1.486 | 0.001   | 0.057 | F: E2F                       |
| 40 | V\$E2F1_Q4_01                                                    | MSigDB v03    | 162  | -1.482 | 0.001   | 0.062 | F: E2F                       |
| 41 | V\$E2F_Q4_01                                                     | MSigDB v03    | 165  | -1.481 | 0.004   | 0.062 | F: E2F                       |
| 42 | V\$E2F_Q3_01                                                     | MSigDB v03    | 166  | -1.470 | 0.001   | 0.065 | F: E2F                       |
| 43 | V\$E2F_Q2                                                        | MSigDB v03    | 164  | -1.445 | 0.000   | 0.093 | F: E2F                       |
| 44 | V\$E2F1_Q6_01                                                    | MSigDB v03    | 172  | -1.442 | 0.001   | 0.100 | F: E2F                       |
| 45 | V\$E2F_Q4                                                        | MSigDB v03    | 162  | -1.438 | 0.001   | 0.103 | F: E2F                       |
| 46 | V\$E2F_Q6                                                        | MSigDB v03    | 161  | -1.431 | 0.003   | 0.118 | F: E2F                       |
| 47 | V\$E2F_Q3                                                        | MSigDB v03    | 157  | -1.422 | 0.011   | 0.135 | F: E2F                       |
| 48 | V\$E2F1_Q6                                                       | MSigDB v03    | 162  | -1.420 | 0.003   | 0.138 | F: E2F                       |
| 49 | V\$E2F1_Q4                                                       | MSigDB v03    | 172  | -1.400 | 0.008   | 0.177 | F: E2F                       |

**Supplementary Table S7. Functional Enrichment Analysis for the neuroblastoma specific JQ1 downregulation signature.**

| Gene Set Name                                    | # Genes in Gene Set (K) | # Genes in Overlap (k) | k/K   | p value |
|--------------------------------------------------|-------------------------|------------------------|-------|---------|
| LEE_NEURAL_CREST_STEM_CELL_UP                    | 147                     | 11                     | 0.075 | 0.000   |
| REACTOME_DOPAMINE_NEUROTRANSMITTER_RELEASE_CYCLE | 14                      | 3                      | 0.214 | 0.001   |
| V\$LHX3_01                                       | 186                     | 12                     | 0.065 | 0.013   |
| V\$ZIC3_01                                       | 206                     | 12                     | 0.058 | 0.026   |
| BIOCARTA_DEATH_PATHWAY                           | 33                      | 4                      | 0.121 | 0.001   |
| CONCANNON_APOPTOSIS_BY_EPOXOMICIN_DN             | 171                     | 12                     | 0.070 | 0.000   |
| HOLLMAN_APOPTOSIS_VIA_CD40_DN                    | 271                     | 14                     | 0.052 | 0.000   |
| HAMAL_APOPTOSIS_VIA_TRAIL_DN                     | 126                     | 8                      | 0.064 | 0.000   |
| RORIE_TARGETS_OF_EWSR1_FLI1_FUSION_DN            | 22                      | 4                      | 0.182 | 0.000   |
| V\$SRF_01                                        | 47                      | 5                      | 0.106 | 0.014   |
| V\$SRF_Q5_01                                     | 191                     | 11                     | 0.058 | 0.034   |
| V\$E47_01                                        | 205                     | 14                     | 0.068 | 0.004   |
| RTAAACA_V\$FREAC2_01                             | 714                     | 32                     | 0.045 | 0.020   |
| V\$AR_Q2                                         | 99                      | 7                      | 0.071 | 0.033   |
| V\$EGR2_01                                       | 147                     | 9                      | 0.061 | 0.038   |
| DOUGLAS_BMI1_TARGETS_UP                          | 512                     | 24                     | 0.047 | 0.000   |
| BENPORATH_SUZ12_TARGETS                          | 1037                    | 30                     | 0.029 | 0.000   |
| BENPORATH_EED_TARGETS                            | 1062                    | 29                     | 0.027 | 0.000   |
| BENPORATH_ES_WITH_H3K27ME3                       | 1117                    | 30                     | 0.027 | 0.000   |
| BENPORATH_PRC2_TARGETS                           | 652                     | 20                     | 0.031 | 0.000   |
| BENPORATH_OCT4_TARGETS                           | 290                     | 12                     | 0.041 | 0.000   |
| BENPORATH_NANOG_TARGETS                          | 988                     | 26                     | 0.026 | 0.000   |
| BENPORATH_SOX2_TARGETS                           | 734                     | 20                     | 0.027 | 0.001   |

**Supplementary Table S8. Statistical analysis of genotypes conferring sensitivity and resistance to JQ1**

| <b>Gene</b>   | <b>Sensitive<br/>(25%)</b> | <b>Resistant<br/>(75%)</b> |
|---------------|----------------------------|----------------------------|
| <i>MYCN</i>   | p = 0.015                  | NS                         |
| <i>NOTCH1</i> | p = 0.015                  | NS                         |
| <i>GNAS</i>   | NS                         | p = 0.015                  |
| <i>MDM2</i>   | NS                         | p = 0.026                  |
| <i>NF2</i>    | NS                         | p = 0.02                   |

**Supplementary Table S9. shRNA Clone Information and Target Sequences**

| <b>Designation</b> | <b>Clone ID</b> | <b>Clone Name</b>    | <b>Target Sequence</b> |
|--------------------|-----------------|----------------------|------------------------|
| shBRD4_2           | TRCN0000195245  | NM_058243.1-532s1c1  | CCTATGGATATGGGAACAATA  |
| shBRD4_3           | TRCN0000021427  | NM_058243.1-646s1c1  | CCTGGAGATGACATAGTCTTA  |
| shBRD4_4           | TRCN0000021426  | NM_058243.1-1485s1c1 | CGTCCGATTGATGTTCTCCAA  |
| shBRD4_10          | TRCN0000199972  | NM_058243.1-5005s1c1 | CCAACCAAAGTCAGTTCCTTC  |
| shMYCN_1           | TRCN0000020694  | NM_005378.3-2000s1c1 | GCCAGTATTAGACTGGAAGTT  |
| shMYCN_3           | TRCN0000020696  | NM_005378.3-230s1c1  | CGGACGAAGATGACTTCTACT  |
| shMYCN_5           | TRCN0000020698  | NM_005378.3-919s1c1  | CTGAGCGATTGATGATGAA    |
| shControl          |                 |                      | CCTAAGGTTAAGTCGCCCTCGC |
